# Supplementary material for: A redox-economical synthesis of trifluoromethylated enamides with the Langlois reagent
Source: Royal Society of Chemistry journal article supplement (doi:10.1039/c7ob00203c), 2017-01-01
Supplement: c7ob00203c1.pdf [file c7ob00203c1.pdf]

## Supporting Information

### A Redox-Economical Synthesis of Trifluoromethylated Enamides with the Langlois Reagent

Hai-Bin Yang and Nicklas Selander\*

*Department of Organic Chemistry Stockholm University, Arrhenius Laboratory SE-106 91 Stockholm, Sweden. E-mail: nicklas.selander@su.se*

#### Table of Contents

|                                                                                                                                        |           |
|----------------------------------------------------------------------------------------------------------------------------------------|-----------|
| <b>1. General Information .....</b>                                                                                                    | <b>2</b>  |
| <b>2. Experimental Procedures and Spectral Data .....</b>                                                                              | <b>3</b>  |
| 2.1. Preparation of starting materials                                                                                                 | 3         |
| 2.2. General procedure for the screening of reaction conditions                                                                        | 3         |
| 2.3. General procedure for the copper-catalyzed trifluoromethylation of oxime acetates <b>1</b>                                        | 5         |
| 2.4. General procedure for the trifluoromethylation of oxime acetates <b>1</b> and isolation of enamides <b>2</b>                      | 6         |
| 2.5. General procedure for the trifluoromethylation of oxime acetates <b>1</b> and subsequent hydrolysis                               | 8         |
| 2.6. Procedure for the domino acetylation/trifluoromethylation of acetophenone oxime <b>1a</b>                                         | 11        |
| 2.7. Procedure for the reduction of enamide <b>2a</b> to compound <b>5a</b>                                                            | 11        |
| 2.8. Procedure for polysubstituted oxazole <b>6a</b>                                                                                   | 12        |
| 2.9. The effect of added TEMPO to the trifluoromethylation reaction                                                                    | 13        |
| 2.10. Trifluoromethylation of enamide <b>7a</b>                                                                                        | 13        |
| 2.11. The effect of CF <sub>3</sub> SO <sub>2</sub> Na for the formation of <b>7a</b>                                                  | 13        |
| 2.12. Procedure for the trifluoromethylation and subsequent hydrolysis of enamide <b>7a</b> in the presence of oxime acetate <b>1c</b> | 14        |
| 2.13. Monitoring the trifluoromethylation of oxime acetate <b>1a</b> by <sup>1</sup> H NMR and <sup>19</sup> F NMR                     | 16        |
| <b>3. <sup>1</sup>H, <sup>13</sup>C and <sup>19</sup>F NMR Spectra.....</b>                                                            | <b>18</b> |
| <b>4. References.....</b>                                                                                                              | <b>54</b> |

## 1. General Information

All reactions were carried out under argon unless otherwise stated. Oxime acetates **1** were prepared according to literature procedures using commercial reagents (Section 2).<sup>1</sup> All other starting materials and solvents were purchased from commercial suppliers and used as received.

<sup>1</sup>H NMR and <sup>13</sup>C NMR spectra were recorded at room temperature in CDCl<sub>3</sub> or CD<sub>3</sub>CN on a Bruker 400 or a 500 MHz spectrometer. Chemical shifts ( $\delta$ ) are reported in ppm with the following abbreviations used for the observed multiplicities: s (singlet), d (doublet), t (triplet), q (quartet), br (broad), m (multiplet for unresolved lines). <sup>1</sup>H NMR chemical shifts were referenced to the residual solvent signal for CHCl<sub>3</sub> (7.26 ppm) or MeCN (1.94 ppm), and <sup>13</sup>C NMR chemical shifts were referenced to the solvent signal of CDCl<sub>3</sub> (77.0 ppm) or CD<sub>3</sub>CN (1.32 ppm). Analytical TLC was performed on pre-coated silica gel plates. After elution, the plates were visualized by UV illumination at 254–360 nm and by staining with ethanolic KMnO<sub>4</sub> or ethanolic phosphomolybdic acid. Column chromatography was performed using Davisil 60Å silica gel (35–70  $\mu$ m). HRMS data were recorded on a microTOF instrument using ESI techniques.

## 2. Experimental Procedures and Spectral Data

### 2.1. Preparation of starting materials

Oxime acetates **1** were synthesized from the corresponding ketones according to literature procedures.<sup>1-2</sup> All other compounds were used as received from commercial sources.

### 2.2. General procedure for the screening of reaction conditions

To a screw-cap vial equipped with a magnetic stirring bar were added oxime acetate **1a** (0.20 mmol), CF<sub>3</sub>SO<sub>2</sub>Na (0.30 mmol), CuCl<sub>2</sub> (0.04 mmol), acylating reagent (0.20 mmol), ligand or additive (0.04 mmol) and CH<sub>3</sub>CN (1.0 mL) under argon (glove-box). The reaction mixture was stirred at 80 °C for 24 h. The mixture was then allowed to cool down to room temperature and the reaction yield was determined by <sup>19</sup>F NMR analysis using α,α,α-trifluorotoluene as an internal standard. The results are summarized in Table S-1, Table S-2, Table S-3 and Table S-4.

**Table S-1: Screening of catalysts<sup>a</sup>**

| catalyst                                            | <b>2a</b> yield (%) | E/Z           |
|-----------------------------------------------------|---------------------|---------------|
| CuBr                                                | 16                  | 1.25:1        |
| CuI                                                 | 15                  | 1.43:1        |
| CuTc                                                | 24                  | 1.40:1        |
| CuOAc                                               | 16                  | 1.29:1        |
| Cu(CH <sub>3</sub> CN) <sub>4</sub> PF <sub>6</sub> | 30                  | 2.00:1        |
| CuCl <sub>2</sub>                                   | 30                  | 1.30:1        |
| <b>CuF<sub>2</sub></b>                              | <b>41</b>           | <b>1.00:1</b> |
| Cu(OAc) <sub>2</sub>                                | 32                  | 1.13:1        |
| MnCl <sub>2</sub> ·4H <sub>2</sub> O                | 0                   | n.d.          |
| FeCl <sub>2</sub>                                   | 0                   | n.d.          |

<sup>a</sup>Yields and E/Z ratios were determined by <sup>19</sup>F NMR. n.d. = not determined.

**Table S-2: Screening of ligands<sup>a</sup>**

| ligand              | <b>2a</b> yield (%) | E/Z    |
|---------------------|---------------------|--------|
| none                | 38                  | 1.82:1 |
| P(Cy) <sub>3</sub>  | 38                  | 1.97:1 |
| 1,10-phenanthroline | 3                   | n.d.   |
| 2,2'-biquinoline    | 27                  | 2.00:1 |

<sup>a</sup>Yields and E/Z ratios were determined by <sup>19</sup>F NMR. n.d. = not determined.

**Table S-3: Screening of acylation reagents<sup>a</sup>**

| acylation reagent              | <b>2</b> yield (%) | R   | E/Z           |
|--------------------------------|--------------------|-----|---------------|
| CBzCl                          | trace              | CBz | 1.82:1        |
| Boc <sub>2</sub> O             | trace              | Boc | 1.97:1        |
| Piv <sub>2</sub> O             | <b>4</b>           | Piv | n.d.          |
| BzCl                           | <b>5</b>           | Bz  | n.d.          |
| AcCl                           | <b>12</b>          | Ac  | <b>5.00:1</b> |
| Ac <sub>2</sub> O              | <b>38</b>          | Ac  | <b>1.82:1</b> |
| Ac <sub>2</sub> O <sup>b</sup> | <b>0</b>           | Ac  | n.d.          |
|                                | trace              | Ac  | n.d.          |
|                                | <b>13</b>          | Ac  | <b>3.25:1</b> |

<sup>a</sup>Yields and E/Z ratios were determined by <sup>19</sup>F NMR. n.d. = not determined.<sup>b</sup>CF<sub>3</sub>SO<sub>2</sub>Zn (1.5 equiv) was used as CF<sub>3</sub> source.**Table S-4: Screening of additives<sup>a</sup>**

| additive                               | <b>2a</b> yield (%) | E/Z           |
|----------------------------------------|---------------------|---------------|
| none                                   | <b>38</b>           | <b>1.82:1</b> |
| Cs <sub>2</sub> CO <sub>3</sub>        | <b>38</b>           | <b>1.95:1</b> |
| NaHSO <sub>3</sub>                     | <b>38</b>           | <b>1.92:1</b> |
| Li <sub>2</sub> CO <sub>3</sub>        | <b>44</b>           | <b>1.78:1</b> |
| proton sponge                          | <b>22</b>           | <b>2.17:1</b> |
| LiCl (1 equiv)                         | <b>44</b>           | <b>1.92:1</b> |
| Bu <sub>4</sub> NBr                    | <b>29</b>           | <b>2.24:1</b> |
| Yb(OTf) <sub>3</sub> ·H <sub>2</sub> O | <b>19</b>           | <b>2.8:1</b>  |
| Sc(OTf) <sub>3</sub>                   | <b>40</b>           | <b>1.86:1</b> |
| In(OTf) <sub>3</sub>                   | <b>44</b>           | <b>1.93:1</b> |
| BEt <sub>3</sub>                       | <b>0</b>            | n.d.          |

<sup>a</sup>Yields and E/Z ratios were determined by <sup>19</sup>F NMR. n.d. = not determined.

### 2.3. General procedure for the copper-catalyzed trifluoromethylation of oxime acetates **1**

To a screw-cap vial equipped with a magnetic stirring bar were added oxime acetates **1** (0.20 mmol),  $\text{CF}_3\text{SO}_2\text{Na}$  (0.30 mmol),  $\text{CuF}_2$  (0.04 mmol), acetic anhydride (0.30 mmol) and  $\text{CH}_3\text{CN}$  (4.0 mL) under argon (glove-box). The reaction mixture was stirred at 80 °C for 48 h or 100 °C for 24 h. After the mixture was allowed to cool down to room temperature, the reaction yields and the *E/Z* selectivity were determined by  $^{19}\text{F}$  NMR analysis using  $\alpha,\alpha,\alpha$ -trifluorotoluene as an internal standard. The results are summarized in Table S-5.

**Table S-5: Substrate scope for the copper-catalyzed oxidative trifluoromethylation of oxime acetates **1** with the Langlois reagent<sup>a</sup>**

| 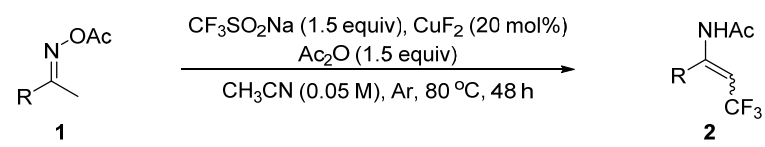                                        |                                                                                                                            |
|---------------------------------------------------------------------------------------------------------------------------|----------------------------------------------------------------------------------------------------------------------------|
| <br><b>2a</b> 65%, 1.41:1               | <br><b>2b</b> 55%, 2.70:1                |
| <br><b>2c</b> 65%, 1.66:1              | <br><b>2d<sup>b</sup></b> 58%, 1.50:1  |
| <br><b>2e<sup>b</sup></b> 53%, 1.40:1  | <br><b>2f<sup>b</sup></b> 30%, 1.00:1   |
| <br><b>2g</b> 68%, 2.10:1             | <br><b>2h<sup>b</sup></b> 38%, 1.38:1 |
| <br><b>2i<sup>b</sup></b> 58%, 2.87:1  | <br><b>2j</b> 64%, 3.70:1               |
| <br><b>2k<sup>b</sup></b> 33%, 1.00:1 | <br><b>2l</b> 18%, only E             |
| <br><b>2m</b> 5%, only E               |                                                                                                                            |

<sup>a</sup> Unless otherwise noted, the reactions were carried out at 80 °C using **1** (0.20 mmol), Langlois reagent (0.30 mmol),  $\text{CuF}_2$  (0.04 mmol) and  $\text{Ac}_2\text{O}$  (0.30 mmol) in acetonitrile (4.0 mL) for 48 h. NMR yields and *E/Z* ratios were determined using  $\alpha,\alpha,\alpha$ -trifluorotoluene as an internal standard).

<sup>b</sup> The reactions were carried out at 100 °C for 24 h.

## 2.4. General procedure for the trifluoromethylation of oxime acetates **1** and isolation of enamides **2**

To a screw-cap vial equipped with a magnetic stirring bar were added oxime acetate **1** (1.0 equiv),  $\text{CF}_3\text{SO}_2\text{Na}$  (1.5 equiv),  $\text{CuF}_2$  (0.2 equiv), acetic anhydride (1.5 equiv) and  $\text{CH}_3\text{CN}$  (20 mL/mmol) under argon (glove-box). The resulting mixture was stirred at 80 °C for 72 hours. The solvent was removed *in vacuo* and the residue was purified by column chromatography using petroleum ether:ethyl acetate 3:1 or 5:1 as the eluent system to obtain compound **2a** (Scheme S-1), **2c**, **2g** and **2j**.

### Scheme S-1 Scale-up reaction

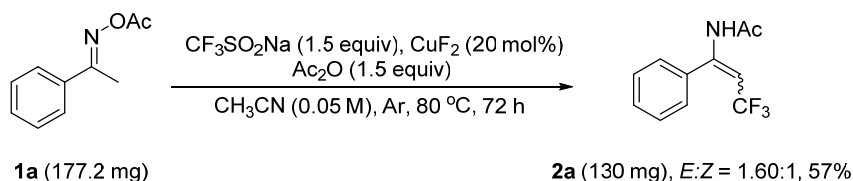

### *N*-(3,3,3-Trifluoro-1-phenylprop-1-en-1-yl)acetamide (**2a**)

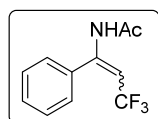

**2a**: (scale: 1.00 mmol, white solid, 57% yield, 130.0 mg, *E:Z* (isolated) = 1.60:1);  $^1\text{H NMR}$  data are in accordance with literature<sup>6</sup> values:  $^1\text{H NMR}$  (500 MHz,  $\text{CDCl}_3$ ):  $\delta$  ppm 7.82-7.23 (m, 6H), 7.13 (br s, 1H), 7.00 (q,  $J = 8.4$  Hz, 1H), 5.50 (q,  $J = 8.1$  Hz, 1H), 1.96 (s, 3H);  $^{13}\text{C NMR}$  (125 MHz,  $\text{CDCl}_3$ ):  $\delta$  ppm 169.43, 168.74 (minor isomer), 144.97 (q,  $J = 5.5$  Hz, minor isomer), 143.93 (q,  $J = 6.0$  Hz), 135.37 (minor isomer), 134.82, 130.08 (minor isomer), 129.61, 128.57 (minor isomer), 128.45, 128.13, 126.53 (minor isomer), 124.27 (q,  $J = 268.3$  Hz), 122.85 (q,  $J = 269.7$  Hz, minor isomer), 107.08 (q,  $J = 23.9$  Hz, minor isomer), 102.75 (q,  $J = 34.9$  Hz), 24.54, 23.23 (minor isomer);  $^{19}\text{F NMR}$  (376 MHz,  $\text{CDCl}_3$ ):  $\delta$  ppm -52.85 (d,  $J = 8.4$  Hz), -57.68 (d,  $J = 8.1$  Hz, minor isomer); **HRMS** (ESI):  $m/z$  calcd for  $\text{C}_{11}\text{H}_{10}\text{F}_3\text{NNaO}$   $[\text{M}+\text{Na}]^+$  252.0607, found 252.0605.

### *N*-(3,3,3-Trifluoro-1-(4-methoxyphenyl)prop-1-en-1-yl)acetamide (**2c**)

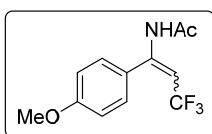

**2c**: (scale: 0.50 mmol, white solid, 55% yield, 71.0 mg, *E:Z* (isolated) = 1.62:1);  $^1\text{H NMR}$  data are in accordance with literature<sup>6</sup> values:  $^1\text{H NMR}$  (400 MHz,  $(\text{CD}_3)_2\text{CO}$ ):  $\delta$  ppm 8.81 (brs, 1H, minor isomer), 8.69 (brs, 1H), 7.49 (d,  $J = 8.8$  Hz, 2H, minor isomer), 7.31 (d,  $J = 8.7$  Hz, 2H), 7.06 (q,  $J = 8.9$  Hz, 1H), 6.97-6.93 (m, 2H (minor isomer) + 2H (major isomer)), 5.80 (q,  $J = 8.3$  Hz, 1H), 3.83 (s, 3H), 3.58 (s, 3H, minor isomer), 2.09 (s, 3H), 2.07 (s, 3H, minor isomer);  $^{13}\text{C NMR}$  (100 MHz,  $(\text{CD}_3)_2\text{CO}$ ):  $\delta$  ppm 170.70, 169.44 (minor isomer), 162.16 (minor isomer), 161.48, 146.78 (q,  $J = 6.2$  Hz), 145.72 (q,  $J = 5.7$  Hz, minor isomer), 130.73 (q,  $J = 1.8$  Hz), 129.34, 129.11, 127.95, 126.07 (q,  $J = 267.0$  Hz), 124.34 (q,  $J = 268.6$  Hz, minor isomer), 114.68, 114.35, 107.17 (q,  $J = 33.4$  Hz, minor isomer), 100.97 (q,  $J = 34.4$  Hz), 71.14 (minor isomer), 55.66, 24.51, 23.14 (minor isomer);  $^{19}\text{F NMR}$  (376 MHz,  $\text{CDCl}_3$ ):  $\delta$  ppm -53.00 (d,  $J = 8.6$  Hz), -57.48 (d,  $J = 8.1$  Hz, minor isomer); **HRMS** (ESI):  $m/z$  calcd for  $\text{C}_{12}\text{H}_{12}\text{F}_3\text{NNaO}_2$   $[\text{M}+\text{Na}]^+$  282.0712, found 282.0719.

***N*-(3,3,3-Trifluoro-1-(*m*-tolyl)prop-1-en-1-yl)acetamide (2g)**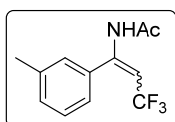

**2g**: (scale: 0.50 mmol, white solid, 61% yield, 74.2 mg, *E:Z* (isolated) = 1.94:1);  $^1\text{H}$  NMR data are in accordance with literature<sup>6</sup> values:  $^1\text{H}$  NMR (400 MHz,  $\text{CDCl}_3$ ):  $\delta$  ppm 7.45-6.97 (m, 6H (major isomer) +5H (minor isomer)), 5.52 (q,  $J$  = 8.2 Hz, 1H), 2.40 (s, 3H), 2.39 (s, 3H), 2.04 (s, 3H), 2.03 (s, 3H);  $^{13}\text{C}$  NMR (126 MHz,  $\text{CDCl}_3$ ):  $\delta$  ppm 169.25, 145.15 (q,  $J$  = 5.6 Hz, minor isomer), 144.01 (q,  $J$  = 6.1 Hz), 138.34, 135.39, 134.84, 130.95, 130.37, 128.59, 128.47, 128.38, 127.16, 125.23, 124.30 (q,  $J$  = 268.4 Hz), 123.74, 122.90 (q,  $J$  = 269.4 Hz, minor isomer), 106.87 (q,  $J$  = 31.9 Hz, minor isomer), 102.57 (q,  $J$  = 34.5 Hz), 24.64, 23.28 (minor isomer), 21.30 (minor isomer), 21.24;  $^{19}\text{F}$  NMR (376 MHz,  $\text{CDCl}_3$ ):  $\delta$  ppm -53.15 (d,  $J$  = 8.2 Hz), -57.72 (d,  $J$  = 7.8 Hz, minor isomer); HRMS (ESI):  $m/z$  calcd for  $\text{C}_{12}\text{H}_{12}\text{F}_3\text{NNaO}$  [ $\text{M}+\text{Na}$ ] $^+$  266.0763, found 266.0763.

***N*-(3,3,3-Trifluoro-1-(naphthalen-1-yl)prop-1-en-1-yl)acetamide (2j)**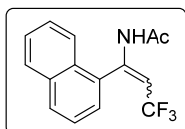

**2j**: (scale: 0.50 mmol, white solid, 54% yield, 75.4 mg, *E:Z* (isolated) = 17.5:1);  $^1\text{H}$  NMR (400 MHz,  $(\text{CD}_3)_2\text{CO}$ ):  $\delta$  ppm 8.92 (brs, 1H), 7.99 (t,  $J$  = 9.0 Hz, 2H), 7.91 (d,  $J$  = 7.8 Hz, 1H), 7.65-7.48 (m, 4H), 7.44 (q,  $J$  = 8.9 Hz, 1H), 2.09 (s, 3H);  $^{13}\text{C}$  NMR (100 MHz,  $(\text{CD}_3)_2\text{CO}$ ):  $\delta$  ppm 170.76, 145.34 (q,  $J$  = 6.1 Hz), 134.37, 132.92, 131.85, 130.44, 129.13, 127.91 (q,  $J$  = 1.9 Hz), 127.77, 127.16, 125.94, 125.87 (q,  $J$  = 267.5 Hz), 125.72, 102.97 (q,  $J$  = 34.5 Hz), 24.47;  $^{19}\text{F}$  NMR (376 MHz,  $\text{CDCl}_3$ ):  $\delta$  ppm -54.89 (d,  $J$  = 8.0 Hz), -57.24 (d,  $J$  = 9.3 Hz, minor isomer); HRMS (ESI):  $m/z$  calcd for  $\text{C}_{15}\text{H}_{12}\text{F}_3\text{NNaO}$  [ $\text{M}+\text{Na}$ ] $^+$  302.0763, found 302.0764.

## 2.5. General procedure for the trifluoromethylation of oxime acetates **1** and subsequent hydrolysis

To a screw-cap vial equipped with a magnetic stirring bar were added oxime acetates **1** (0.20 mmol), CF<sub>3</sub>SO<sub>2</sub>Na (0.30 mmol), CuF<sub>2</sub> (0.04 mmol), acetic anhydride (0.30 mmol) and CH<sub>3</sub>CN (4.0 mL) under argon (glove-box). The resulting mixture was stirred at 80 °C for 48 h or 100 °C for 24 h. The solvent was removed *in vacuo* and the residue was purified by a short column of silica gel. The resulting material was dissolved in 1,4-dioxane (1.0 mL) and treated with aqueous HCl (2 M, 1.0 mL) at 80 °C for 2 h. The mixture was then diluted with water and extracted with CH<sub>2</sub>Cl<sub>2</sub>. The resulting phases were separated and the organic phase was concentrated *in vacuo*. The crude products were purified by column chromatography with the indicated eluent system to obtain  $\alpha$ -trifluoromethyl substituted ketones **3a-3l**.

### 3,3,3-Trifluoro-1-phenylpropan-1-one (**3a**)

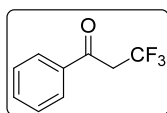

**3a**: (eluent: petroleum ether:ethyl acetate 30:1, white solid, 55% yield, 21.0 mg); NMR data are in accordance with literature<sup>3</sup> values: <sup>1</sup>H NMR (500 MHz, CDCl<sub>3</sub>):  $\delta$  ppm 7.95-7.93 (m, 2H), 7.65-7.62 (m, 1H), 7.53-7.50 (m, 2H), 3.80 (q,  $J$  = 10.0 Hz, 2H); <sup>13</sup>C NMR (100 MHz, CDCl<sub>3</sub>):  $\delta$  ppm 189.67 (q,  $J$  = 2.3 Hz), 135.80 (q,  $J$  = 1.7 Hz), 134.18, 128.92, 128.34, 123.98 (q,  $J$  = 276.9 Hz), 42.09 (q,  $J$  = 28.2 Hz); <sup>19</sup>F NMR (376 MHz, CDCl<sub>3</sub>):  $\delta$  ppm -62.03 (t,  $J$  = 9.9 Hz).

### 3,3,3-Trifluoro-1-(*p*-tolyl)propan-1-one (**3b**)

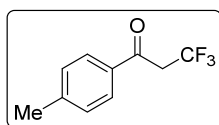

**3b**: (eluent: petroleum ether:ethyl acetate 30:1, white solid, 50% yield, 20.0 mg); NMR data are in accordance with literature<sup>3</sup> values: <sup>1</sup>H NMR (400 MHz, CDCl<sub>3</sub>):  $\delta$  ppm 7.83 (d,  $J$  = 8.3 Hz, 2H), 7.30 (d,  $J$  = 7.9 Hz, 2H), 3.79 (q,  $J$  = 10.0 Hz, 2H), 2.43 (s, 3H); <sup>13</sup>C NMR (100 MHz, CDCl<sub>3</sub>):  $\delta$  ppm 189.27 (q,  $J$  = 2.5 Hz), 145.28, 133.40 (q,  $J$  = 2.1 Hz), 129.59, 128.48, 124.05 (q,  $J$  = 276.9 Hz), 41.97 (q,  $J$  = 28.1 Hz), 21.69; <sup>19</sup>F NMR (376 MHz, CDCl<sub>3</sub>):  $\delta$  ppm -62.03 (t,  $J$  = 9.9 Hz).

### 3,3,3-Trifluoro-1-(4-methoxyphenyl)propan-1-one (**3c**)

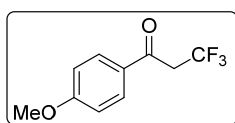

**3c**: (eluent: petroleum ether:ethyl acetate 30:1, white solid, 52% yield, 22.7 mg); NMR data are in accordance with literature<sup>3</sup> values: <sup>1</sup>H NMR (500 MHz, CDCl<sub>3</sub>):  $\delta$  ppm 7.91 (d,  $J$  = 8.9 Hz, 2H), 6.97 (d,  $J$  = 8.9 Hz, 2H), 3.89 (s, 3H), 3.73 (q,  $J$  = 10.1 Hz, 2H); <sup>13</sup>C NMR (125 MHz, CDCl<sub>3</sub>):  $\delta$  ppm 188.09 (q,  $J$  = 2.5 Hz), 164.33, 130.81, 128.94, 124.09 (q,  $J$  = 277.1 Hz), 114.08, 55.58, 41.82 (q,  $J$  = 28.1 Hz); <sup>19</sup>F NMR (376 MHz, CDCl<sub>3</sub>):  $\delta$  ppm -61.95 (t,  $J$  = 10.1 Hz).

### 1-(4-Bromophenyl)-3,3,3-trifluoropropan-1-one (**3d**)

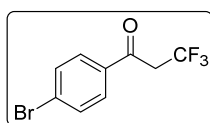

**3d**: (reaction conditions for the trifluoromethylation step: 24 h at 100 °C, eluent: petroleum ether:ethyl acetate 30:1, white solid, 50% yield, 26.7 mg); NMR data are in accordance with literature<sup>4</sup> values: <sup>1</sup>H NMR (400 MHz, CDCl<sub>3</sub>):  $\delta$  ppm 7.85-7.74 (m, 2H), 7.65 (dd,  $J$  = 8.6, 1.4 Hz, 2H), 3.76 (q,  $J$  = 9.9 Hz, 1H); <sup>13</sup>C NMR (100 MHz, CDCl<sub>3</sub>):  $\delta$  ppm 188.72 (q,  $J$  = 2.7 Hz), 134.48 (q,  $J$  = 1.8 Hz),



132.30, 129.79, 129.65, 123.78 (q,  $J = 277.0$  Hz), 42.12 (q,  $J = 28.5$  Hz);  $^{19}\text{F}$  NMR (376 MHz,  $\text{CDCl}_3$ ):  $\delta$  ppm -62.00 (t,  $J = 9.9$  Hz).

#### 4-(3,3,3-Trifluoropropanoyl)benzoic acid (3e)

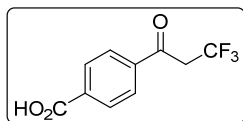

**3e:** (reaction conditions for the trifluoromethylation step: 24 h at 100 °C, hydrolysis was performed at 80 °C for 24 h, eluent: dichloromethane:ethanol 20:1, white solid, 52% yield, 24.0 mg);  $^1\text{H}$  NMR (400 MHz,  $\text{CD}_3\text{CN}$ ):  $\delta$  ppm 8.13 (d,  $J = 8.6$  Hz, 2H), 8.03 (d,  $J = 8.5$  Hz, 2H), 4.08 (q,  $J = 10.4$  Hz, 3H);  $^{13}\text{C}$  NMR (100 MHz,  $\text{CD}_3\text{CN}$ ):  $\delta$  ppm 191.41 (q,  $J = 2.5$  Hz), 166.89, 140.12 (q,  $J = 2.02$  Hz), 135.69, 130.95, 129.29, 125.71 (q,  $J = 275.7$  Hz), 43.06 (q,  $J = 27.6$  Hz);  $^{19}\text{F}$  NMR (376 MHz,  $\text{CD}_3\text{CN}$ ):  $\delta$  ppm -63.18 (t,  $J = 10.2$  Hz); HRMS (ESI):  $m/z$  calcd for  $\text{C}_{10}\text{H}_6\text{F}_3\text{O}_3$   $[\text{M}-\text{H}]^-$  231.0275, found 231.0273.

#### 3,3,3-Trifluoro-1-(4-nitrophenyl)propan-1-one (3f)

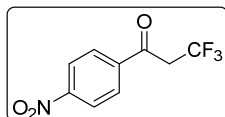

**3f:** (reaction conditions for the trifluoromethylation step: 24 h at 100 °C, eluent: petroleum ether:ethyl acetate 20:1, white solid, 30% yield, 14.0 mg); NMR data are in accordance with literature<sup>3</sup> values:  $^1\text{H}$  NMR (400 MHz,  $\text{CDCl}_3$ ):  $\delta$  ppm 8.38 (d,  $J = 8.8$  Hz, 2H), 8.12 (d,  $J = 8.8$  Hz, 2H), 3.89 (q,  $J = 9.7$  Hz, 2H);  $^{13}\text{C}$  NMR (125 MHz,  $\text{CDCl}_3$ ):  $\delta$  ppm 188.30 (q,  $J = 2.5$  Hz), 150.91, 139.91, 129.46, 124.16, 123.50 (q,  $J = 277.4$  Hz), 42.70 (q,  $J = 28.8$  Hz);  $^{19}\text{F}$  NMR (376 MHz,  $\text{CDCl}_3$ ):  $\delta$  ppm -62.00 (t,  $J = 9.6$  Hz).

#### 3,3,3-Trifluoro-1-(*m*-tolyl)propan-1-one (3g)

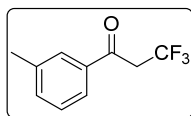

**3g:** (eluent: petroleum ether:ethyl acetate 30:1, white solid, 60% yield, 24 mg); NMR data are in accordance with literature<sup>5</sup> values:  $^1\text{H}$  NMR (400 MHz,  $\text{CDCl}_3$ ):  $\delta$  ppm 7.86-7.63 (m, 2H), 7.52-7.31 (m, 2H), 3.78 (q,  $J = 10.0$  Hz, 2H), 2.43 (s, 3H);  $^{13}\text{C}$  NMR (125 MHz,  $\text{CDCl}_3$ ):  $\delta$  ppm 189.85 (q,  $J = 2.4$  Hz), 138.86, 135.85, 134.95, 128.80, 128.76, 125.58, 124.02 (q,  $J = 276.9$  Hz), 42.09 (q,  $J = 28.2$  Hz), 21.29;  $^{19}\text{F}$  NMR (376 MHz,  $\text{CDCl}_3$ ):  $\delta$  ppm -62.06 (t,  $J = 10.1$  Hz).

#### 1-(3-Bromophenyl)-3,3,3-trifluoropropan-1-one (3h)

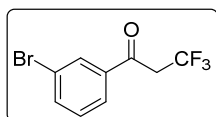

**3h:** (reaction conditions for the trifluoromethylation step: 24 h at 100 °C, eluent: petroleum ether:ethyl acetate 30:1, white solid, 38% yield, 20.3 mg); NMR data are in accordance with literature<sup>3</sup> values:  $^1\text{H}$  NMR (400 MHz,  $\text{CDCl}_3$ ):  $\delta$  ppm 8.06 (t,  $J = 1.8$  Hz, 1H), 7.85 (ddd,  $J = 7.9, 1.7, 1.0$  Hz, 1H), 7.76 (ddd,  $J = 8.0, 2.0, 1.0$  Hz, 1H), 7.41 (t,  $J = 7.9$  Hz, 1H), 3.80 (q,  $J = 9.8$  Hz, 2H);  $^{13}\text{C}$  NMR (100 MHz,  $\text{CDCl}_3$ ):  $\delta$  ppm 188.48 (q,  $J = 2.5$  Hz), 137.08, 131.23, 130.50, 126.81, 123.68 (q,  $J = 276.9$  Hz), 123.22, 42.06 (q,  $J = 28.5$  Hz);  $^{19}\text{F}$  NMR (376 MHz,  $\text{CDCl}_3$ ):  $\delta$  ppm -62.06 (t,  $J = 9.9$  Hz).

**1-(2-Bromophenyl)-3,3,3-trifluoropropan-1-one (3i)**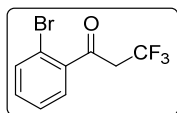

**3i:** (reaction conditions for the trifluoromethylation step: 24 h at 100 °C, eluent: petroleum ether:ethyl acetate 30:1, white solid, 53% yield, 28.0 mg); NMR data are in accordance with literature<sup>5</sup> values: **<sup>1</sup>H NMR** (500 MHz, CDCl<sub>3</sub>):  $\delta$  ppm 7.65 (dd,  $J$  = 7.8, 1.2 Hz, 1H), 7.48-7.33 (m, 3H), 3.84 (q,  $J$  = 10.0 Hz, 2H); **<sup>13</sup>C NMR** (125 MHz, CDCl<sub>3</sub>):  $\delta$  ppm 193.26 (q,  $J$  = 2.52 Hz), 139.98, 133.92, 132.69, 129.17, 127.77, 126.75, 123.44 (q,  $J$  = 277.6 Hz), 118.82, 45.83 (q,  $J$  = 28.4 Hz); **<sup>19</sup>F NMR** (376 MHz, CDCl<sub>3</sub>):  $\delta$  ppm -62.13 (t,  $J$  = 10.2 Hz).

**3,3,3-Trifluoro-1-(naphthalen-1-yl)propan-1-one (3j)**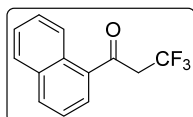

**3j:** (eluent: petroleum ether:ethyl acetate 30:1, white solid, 50% yield, 23.8 mg); NMR data are in accordance with literature<sup>5</sup> values: **<sup>1</sup>H NMR** (400 MHz, CDCl<sub>3</sub>):  $\delta$  ppm 8.72 (d,  $J$  = 8.6 Hz, 1H), 8.06 (d,  $J$  = 8.2 Hz, 1H), 7.90 (d,  $J$  = 8.0 Hz, 1H), 7.87 (d,  $J$  = 8.0 Hz, 1H), 7.68-7.61 (m, 1H), 7.61-7.55 (m, 1H), 7.55-7.49 (m, 1H), 3.91 (q,  $J$  = 10.0 Hz, 2H); **<sup>13</sup>C NMR** (100 MHz, CDCl<sub>3</sub>):  $\delta$  ppm 192.81 (q,  $J$  = 2.5 Hz), 134.24, 133.99, 133.77 (q,  $J$  = 1.9 Hz), 130.15, 128.78, 128.71, 128.56, 126.89, 125.56, 124.14, 123.98 (q,  $J$  = 277.3 Hz), 44.91 (q,  $J$  = 27.9 Hz); **<sup>19</sup>F NMR** (376 MHz, CDCl<sub>3</sub>):  $\delta$  ppm -61.93 (t,  $J$  = 10.0 Hz).

**3,3,3-Trifluoro-1-(furan-2-yl)propan-1-one (3k)**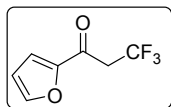

**3k:** (reaction conditions for the trifluoromethylation step: 24 h at 100 °C, eluent: petroleum ether:ethyl acetate 30:1, colorless liquid, 28% yield, 10.1 mg); **<sup>1</sup>H NMR** (400 MHz, CDCl<sub>3</sub>):  $\delta$  ppm 7.66 (dd,  $J$  = 1.7, 0.8 Hz, 1H), 7.32 (dd,  $J$  = 3.6, 0.8 Hz, 1H), 6.62 (dd,  $J$  = 3.6, 1.7 Hz, 1H), 3.67 (t,  $J$  = 10.2 Hz, 1H); **<sup>13</sup>C NMR** (125 MHz, CDCl<sub>3</sub>):  $\delta$  ppm 178.19, 151.93, 147.41, 123.69 (q,  $J$  = 277.4 Hz), 118.76, 113.02, 42.19 (q,  $J$  = 28.8 Hz); **<sup>19</sup>F NMR** (376 MHz, CDCl<sub>3</sub>):  $\delta$  ppm -61.89 (t,  $J$  = 10.2 Hz); **HRMS** (ESI):  $m/z$  calcd for C<sub>7</sub>H<sub>5</sub>F<sub>3</sub>NaO<sub>2</sub> [M+Na]<sup>+</sup> 201.0134, found 201.0137.

**1,1,1-Trifluoro-5-phenylpentan-3-one (3l)**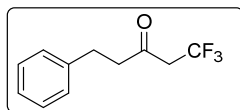

**3l:** (eluent: petroleum ether:ethyl acetate 30:1, white solid, 14% yield, 6.0 mg); NMR data are in accordance with literature<sup>4</sup> values: **<sup>1</sup>H NMR** (400 MHz, CDCl<sub>3</sub>):  $\delta$  ppm 7.33-7.27 (m, 2H), 7.25-7.16 (m, 3H), 3.21 (q,  $J$  = 10.4 Hz, 2H), 2.96-2.90 (m, 2H), 2.89-2.83 (m, 2H); **<sup>13</sup>C NMR** (100 MHz, CDCl<sub>3</sub>):  $\delta$  ppm 199.14 (q,  $J$  = 2.2 Hz), 140.10, 128.62, 128.28, 126.39, 123.53 (q,  $J$  = 277.1 Hz), 46.53 (q,  $J$  = 28.4 Hz), 44.96 (q,  $J$  = 2.0 Hz), 29.20; **<sup>19</sup>F NMR** (376 MHz, CDCl<sub>3</sub>):  $\delta$  ppm -62.33 (t,  $J$  = 10.3 Hz).

## 2.6. Procedure for the domino acetylation/trifluoromethylation of acetophenone oxime 1a

To a screw-cap vial equipped with a magnetic stirring bar were added acetophenone oxime **4a** (0.20 mmol),  $\text{CF}_3\text{SO}_2\text{Na}$  (0.30 mmol),  $\text{CuF}_2$  (0.04 mmol), acetic anhydride (0.60 mmol) and  $\text{CH}_3\text{CN}$  (4.0 mL) under argon (glove-box). The resulting mixture was stirred at 100 °C for 48 hours. The solvent was removed *in vacuo* and the residue purified by column chromatography using petroleum ether:ethyl acetate 5:1 as an eluent system to obtain compound **2a** (Scheme S-2).

### Scheme S-2.

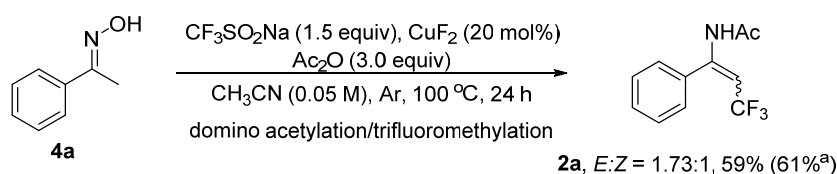

<sup>a</sup>NMR yield ( $\alpha,\alpha,\alpha$ -trifluorotoluene was used as an internal standard).

## 2.7. Procedure for the reduction of enamide 2a to compound 5a

Compound **2a** (0.10 mmol) and  $\text{NiCl}_2 \cdot 6\text{H}_2\text{O}$  (0.10 mmol) were stirred in EtOH (1.0 mL) at 0 °C.  $\text{NaBH}_4$  (0.50 mmol) was added and the suspension was allowed to reach room temperature and subsequently stirred for 2 hours. Another portion of  $\text{NaBH}_4$  (0.50 mmol) was added and the reaction mixture was stirred for additional 2 hours. The mixture was then concentrated *in vacuo* and the residue was purified by column chromatography using petroleum ether:ethyl acetate 3:1 as eluent to obtain compound **5a**.

### *N*-(3,3,3-Trifluoro-1-phenylpropyl)acetamide (**5a**)

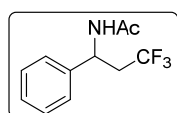

**5a**: (white solid, 61% yield, 14.0 mg); NMR data are in accordance with literature<sup>4</sup> values: <sup>1</sup>H NMR (400 MHz,  $\text{CDCl}_3$ ):  $\delta$  ppm 7.44-7.26 (m, 5H), 6.26-6.07 (m, 1H), 5.34 (td,  $J$  = 8.1, 5.9 Hz, 1H), 2.73 (m, 1H), 2.65-2.49 (m, 1H), 1.97 (s, 3H); <sup>13</sup>C NMR (100 MHz,  $\text{CDCl}_3$ ):  $\delta$  ppm 169.30, 139.97, 128.97, 128.14, 126.35, 125.49 (q,  $J$  = 277.7 Hz), 48.31 (q,  $J$  = 3.1 Hz), 39.45 (q,  $J$  = 27.4 Hz), 23.20; <sup>19</sup>F NMR (376 MHz,  $\text{CDCl}_3$ ):  $\delta$  ppm -63.47 (t,  $J$  = 10.2 Hz).

**2.8. Procedure for polysubstituted oxazole 6a**

Compound **2a** (0.10 mmol) and [bis(trifluoroacetoxy)iodo]benzene (2.50 mmol) were stirred in 1,2-dichloroethane (1.0 mL) at 60 °C for 12 hours. Another portion of [bis(trifluoroacetoxy)iodo]benzene (2.50 mmol) was added and the mixture was stirred at 60 °C for an additional 12 hours. The mixture was concentrated *in vacuo* and the residue was purified by column chromatography using pentane:ethyl acetate 30:1 as eluent to obtain polysubstituted oxazole **6a**.

**2-Methyl-4-phenyl-5-(trifluoromethyl)oxazole (6a)**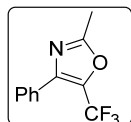

**6a**: (colorless oil, 53% yield, 12.0 mg); NMR data are in accordance with literature<sup>7</sup> values: <sup>1</sup>H NMR (400 MHz, CDCl<sub>3</sub>): δ ppm 7.67 (dd, *J* = 7.6, 2.0 Hz, 2H), 7.54-7.36 (m, 3H), 2.57 (s, 3H); <sup>13</sup>C NMR (125 MHz, CDCl<sub>3</sub>): δ ppm 162.04, 141.33, 133.58 (q, *J* = 42.8 Hz), 129.42, 129.23, 128.53, 128.30, 119.67 (q, *J* = 267.8 Hz), 13.85; <sup>19</sup>F NMR (376 MHz, CDCl<sub>3</sub>): δ ppm -60.37.

## 2.9. The effect of added TEMPO to the trifluoromethylation reaction

To a screw-cap vial equipped with a magnetic stirring bar were added oxime acetate **1a** (0.10 mmol),  $\text{CF}_3\text{SO}_2\text{Na}$  (0.15 mmol),  $\text{CuF}_2$  (0.02 mmol), acetic anhydride (0.15 mmol), TEMPO (0.20 mmol) and  $\text{CH}_3\text{CN}$  (2.0 mL) under argon (glove-box). The resulting mixture was stirred at 80 °C for 48 hours. The solvent was removed *in vacuo* and the reaction yield was determined by  $^1\text{H}$  NMR analysis using 1,3,5-trimethoxybenzene as an internal standard (Scheme S-3).

Scheme S-3.

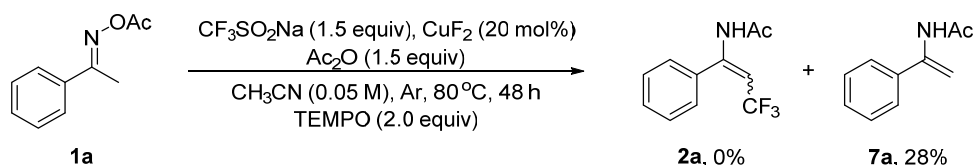

## 2.10. Trifluoromethylation of enamide 7a

To a screw-cap vial equipped with a magnetic stirring bar were added enamide **7a** (0.20 mmol),  $\text{CF}_3\text{SO}_2\text{Na}$  (0.30 mmol),  $\text{CuF}_2$  (0.04 mmol) and  $\text{CH}_3\text{CN}$  (4.0 mL) under argon (glove-box). The reaction mixture was stirred at 100 °C for 24 h. The solvent was removed *in vacuo* and the residue was purified by column chromatography using petroleum ether:ethyl acetate 30:1 to 5:1 as eluent. The low yield of **2a** explains the need of an oxidant for a catalytic turn-over. In the absence of an N-O bond as an oxidant,  $\text{CuF}_2$  or trace amounts of  $\text{O}_2$  may produce a  $\text{CF}_3$  radical reacting with **7a** (Scheme S-4).

Scheme S-4.

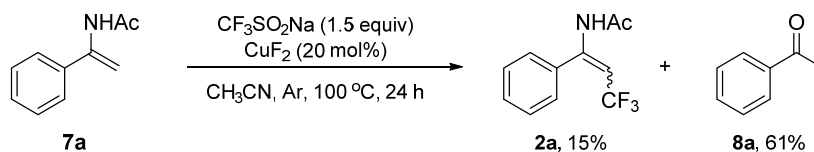

## 2.11. The effect of $\text{CF}_3\text{SO}_2\text{Na}$ for the formation of 7a

To a screw-cap vial equipped with a magnetic stirring bar were added oxime acetate **1a** (0.10 mmol),  $\text{CuF}_2$  (0.10 mmol), acetic anhydride (0.15 mmol) and  $\text{CH}_3\text{CN}$  (2.0 mL) under argon (glove-box). The resulting mixture was stirred at 80 °C for 16 hours. The solvent was removed *in vacuo* and the reaction yield was determined by  $^1\text{H}$  NMR analysis using 1,3,5-trimethoxybenzene as an internal standard. Only unreacted starting material was observed (Scheme S-5).

Scheme S-5.

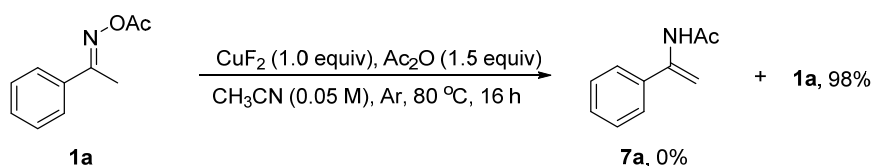

## 2.12. Procedure for the trifluoromethylation and subsequent hydrolysis of enamide **7a** in the presence of oxime acetate **1c**

To a screw-cap vial equipped with a magnetic stirring bar were added oxime acetate **1c** (0.20 mmol), enamide **7a** (0.20 mmol),  $\text{CF}_3\text{SO}_2\text{Na}$  (0.20 mmol),  $\text{CuF}_2$  (0.04 mmol), acetic anhydride (0.30 mmol) and  $\text{CH}_3\text{CN}$  (4.0 mL) under argon (glove-box). The resulting mixture was stirred at 80 °C for 48 hours. After the solvent was removed *in vacuo*, the residue was dissolved in 1,4-dioxane (1.0 mL) and treated with aqueous HCl (2 M, 1.0 mL) at 80 °C for 2 h. The mixture was then diluted with  $\text{CH}_2\text{Cl}_2$  and washed extracted with water. The resulting phases were separated and the organic phase was concentrated *in vacuo*. To the crude sample were added 24.5  $\mu\text{L}$  of  $\alpha,\alpha,\alpha$ -trifluorotoluene and a solution of 1,3,5-trimethoxybenzene in  $\text{CDCl}_3$  (200  $\mu\text{L}$ , 0.33 M) as internal standards. The sample was subsequently analyzed by  $^1\text{H}$  NMR and  $^{19}\text{F}$  NMR.

The results are summarized in Scheme S-6, Figure S-1 and Figure S-2. Compound **7a** was transformed into the trifluoromethylated product **3a** in 26% yield, and the trifluoromethylated product **3c** was obtained in 20% yield. This indicates that an enamide is a key intermediate in the trifluoromethylation reaction, and also that the N-O bond is important for the reaction to take place efficiently.

**Scheme S-6 Trifluoromethylation of oxime acetate **1c** and enamide **7a****

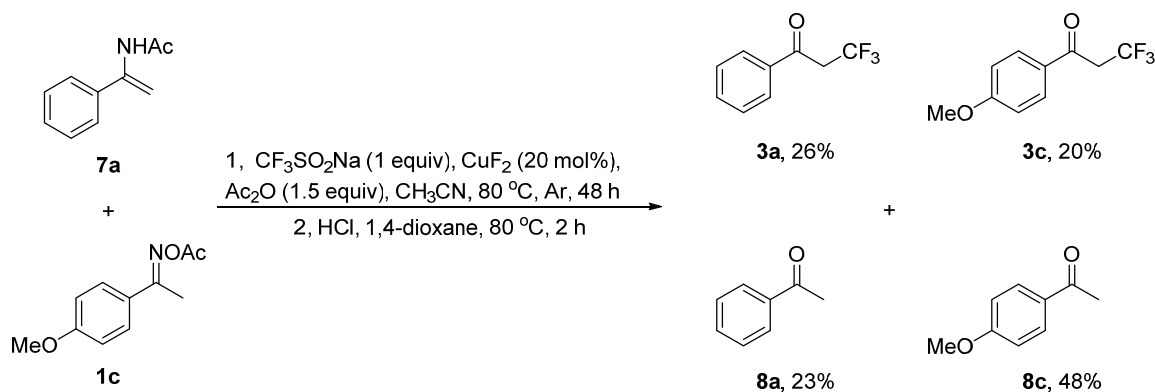

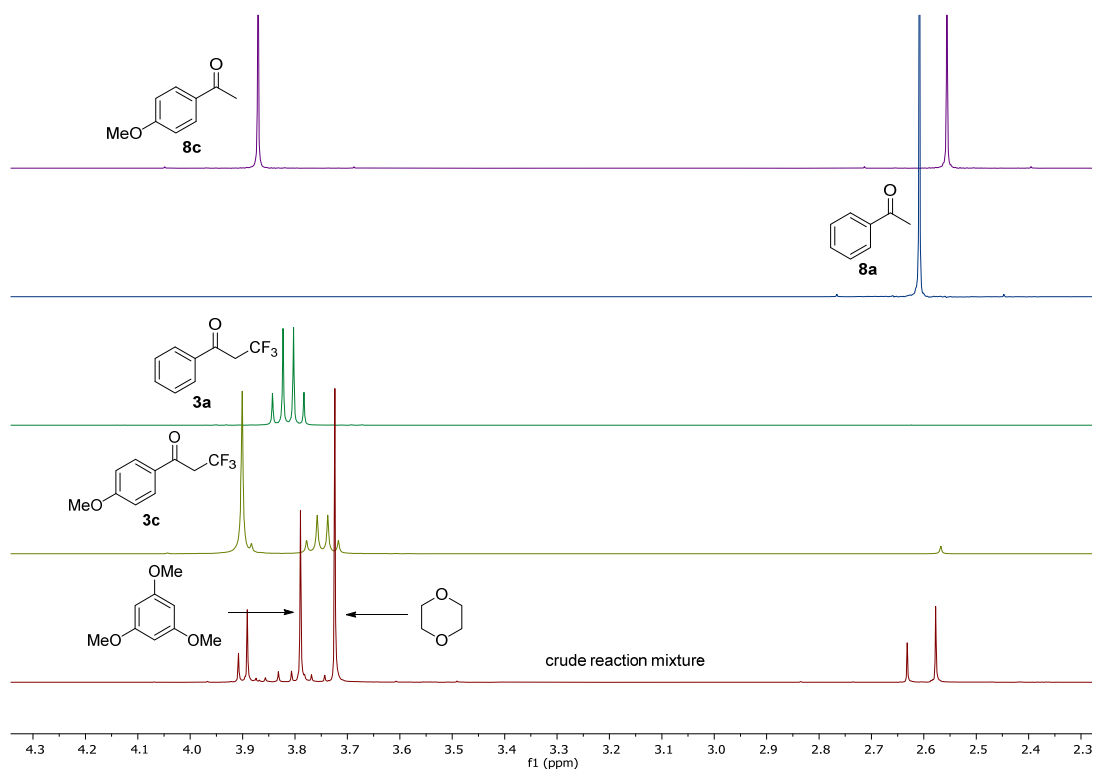

**Figure S-1:**  $^1\text{H}$  NMR spectra of the crude reaction mixture for the trifluoromethylation and subsequent hydrolysis of oxime acetate **1c** and enamide **7a**

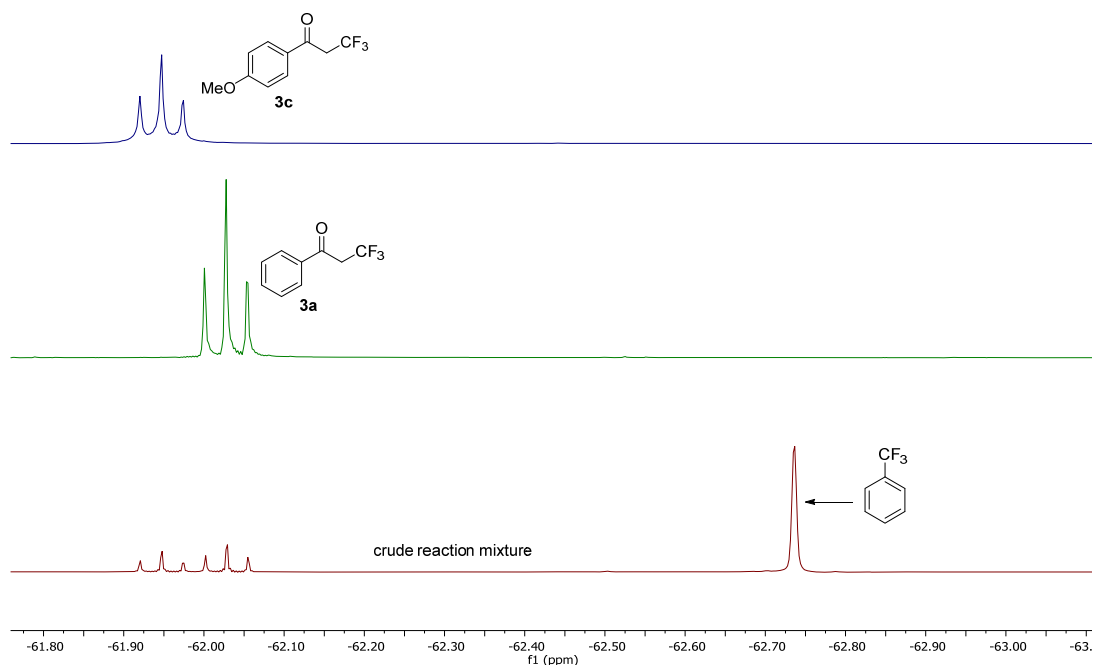

**Figure S-2:**  $^{19}\text{F}$  NMR spectra of the crude reaction mixture for the trifluoromethylation and subsequent hydrolysis of oxime acetate **1c** and enamide **7a**

### 2.13. Monitoring the trifluoromethylation of oxime acetate **1a** by $^1\text{H}$ NMR and $^{19}\text{F}$ NMR

To a screw-cap vial equipped with a magnetic stirring bar were added oxime acetate **1a** (0.40 mmol),  $\text{CF}_3\text{SO}_2\text{Na}$  (0.60 mmol),  $\text{CuF}_2$  (0.08 mmol), acetic anhydride (0.60 mmol), methyl 4-chlorobenzoate (0.13 mmol, internal standard) and  $\text{CH}_3\text{CN}$  (8.0 mL) under argon (glove-box). The resulting mixture was stirred at 80 °C. At the time intervals shown below, 0.5 mL of the suspension was taken out via syringe. The samples were subsequently analyzed by  $^1\text{H}$  NMR and  $^{19}\text{F}$  NMR. The results are summarized in Figure S-3 and Figure S-4.

These data show that enamine **7a** was detectable after 2 hours. The concentration of **7a** remained in a stable concentration (approx. 0.0025 M) until completely consumed. The *E/Z* ratio of product **2a** decreased gradually over time, indicating a thermodynamic preference for the *Z*-isomer, possibly due to a hydrogen bond between the NH and F atom.

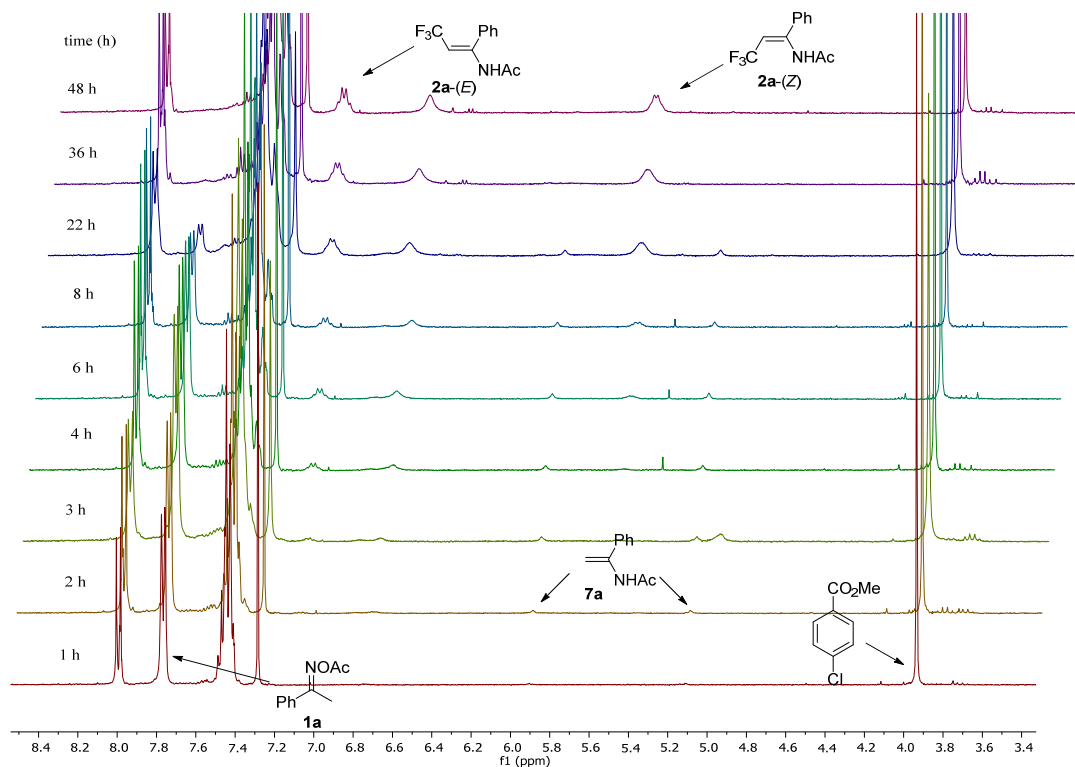

**Figure S-3:**  $^1\text{H}$  NMR spectra of the trifluoromethylation of oxime acetate **1a** acquired at different times



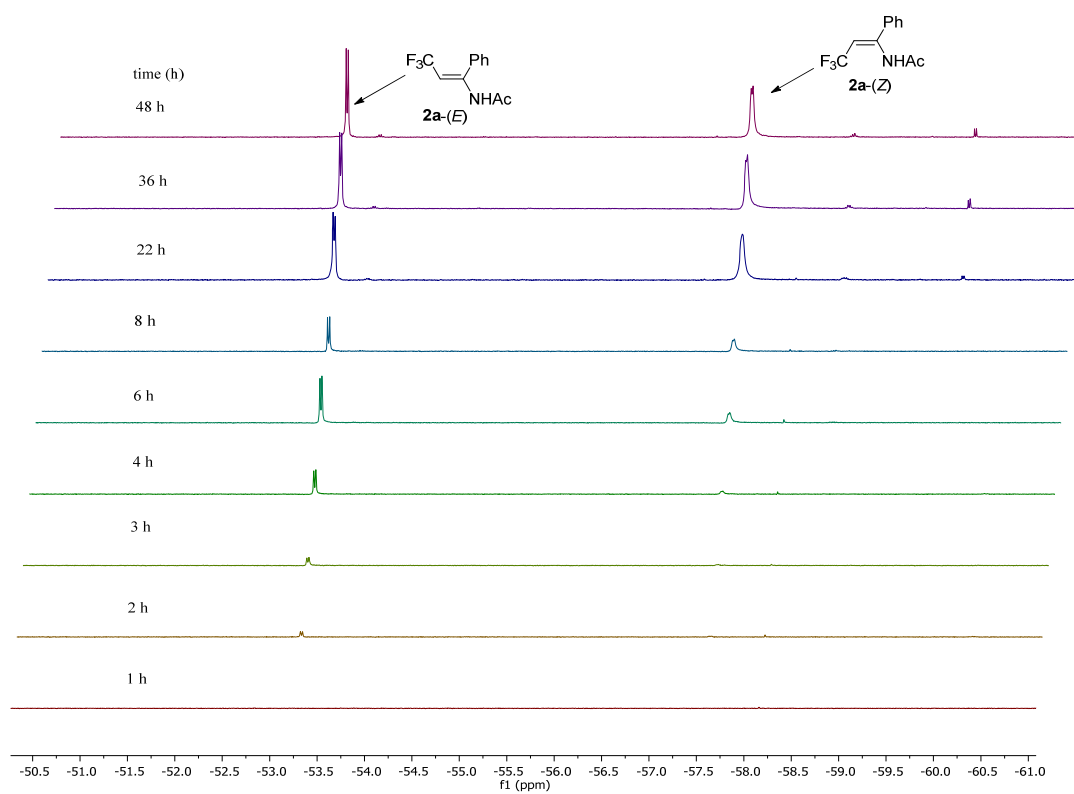

**Figure S-4:**  $^{19}\text{F}$  NMR spectra of the trifluoromethylation of oxime acetate **1a** acquired at different times

### 3. $^1\text{H}$ , $^{13}\text{C}$ and $^{19}\text{F}$ NMR Spectra

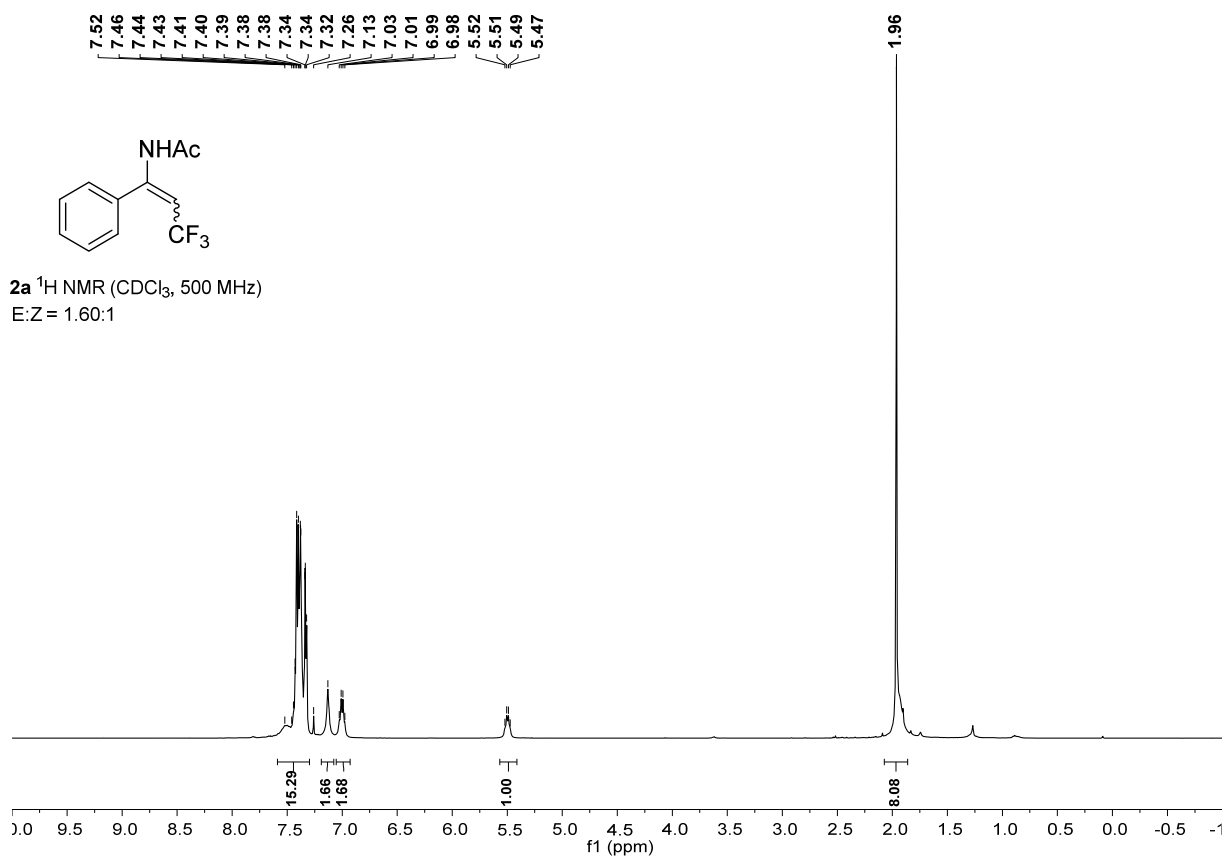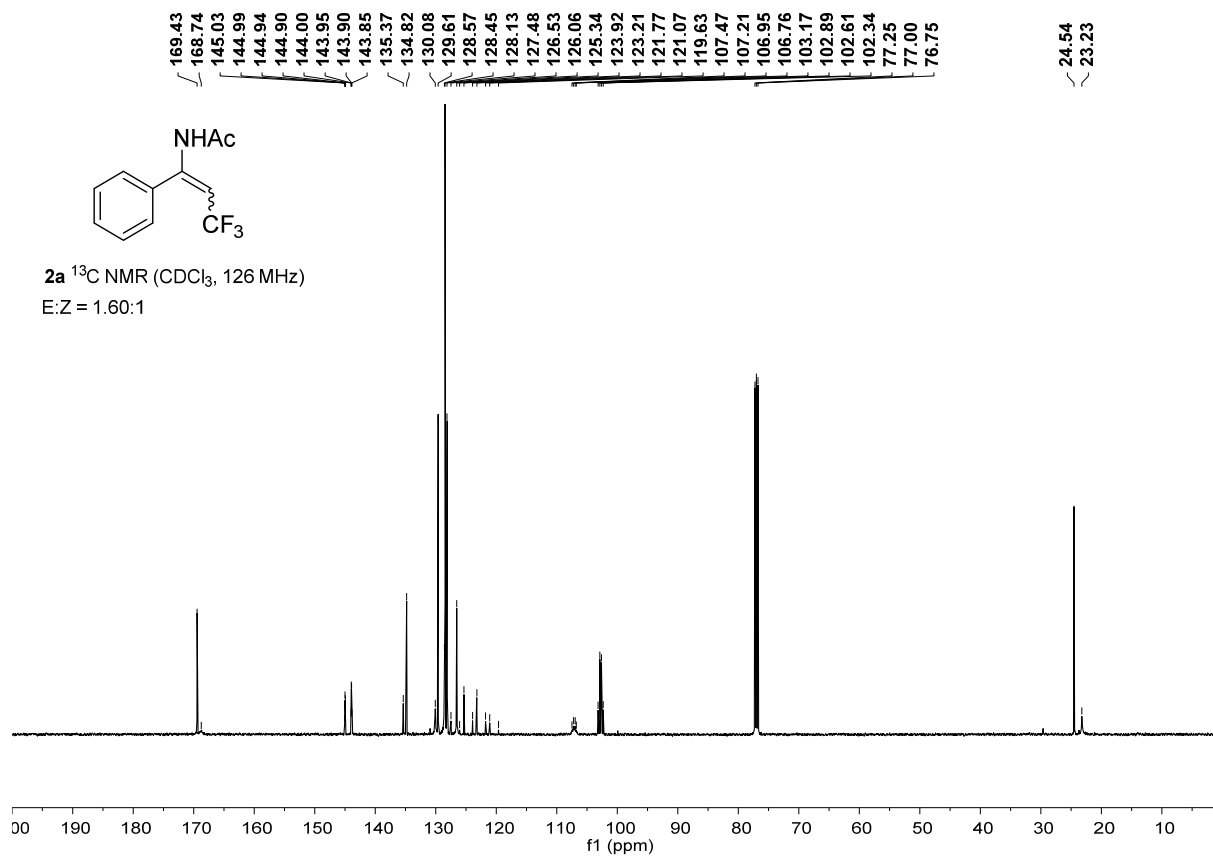

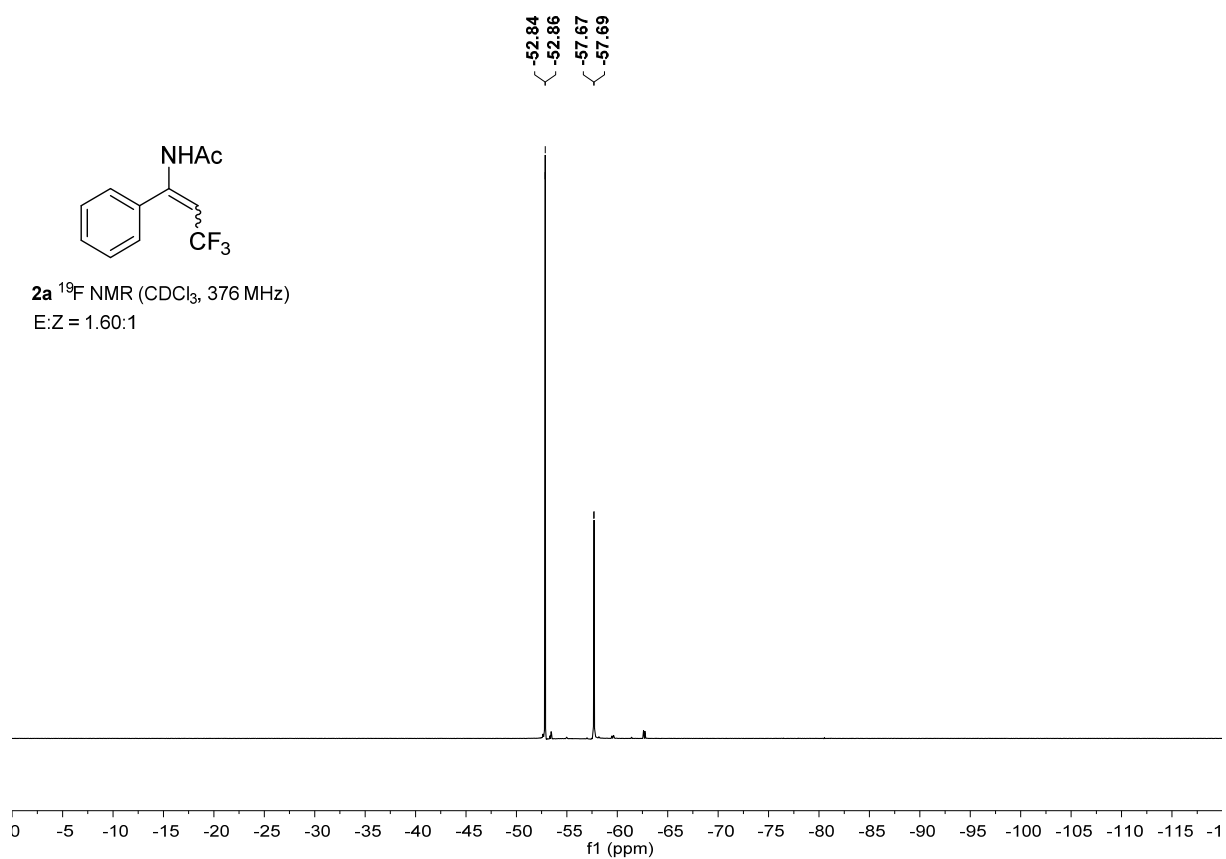

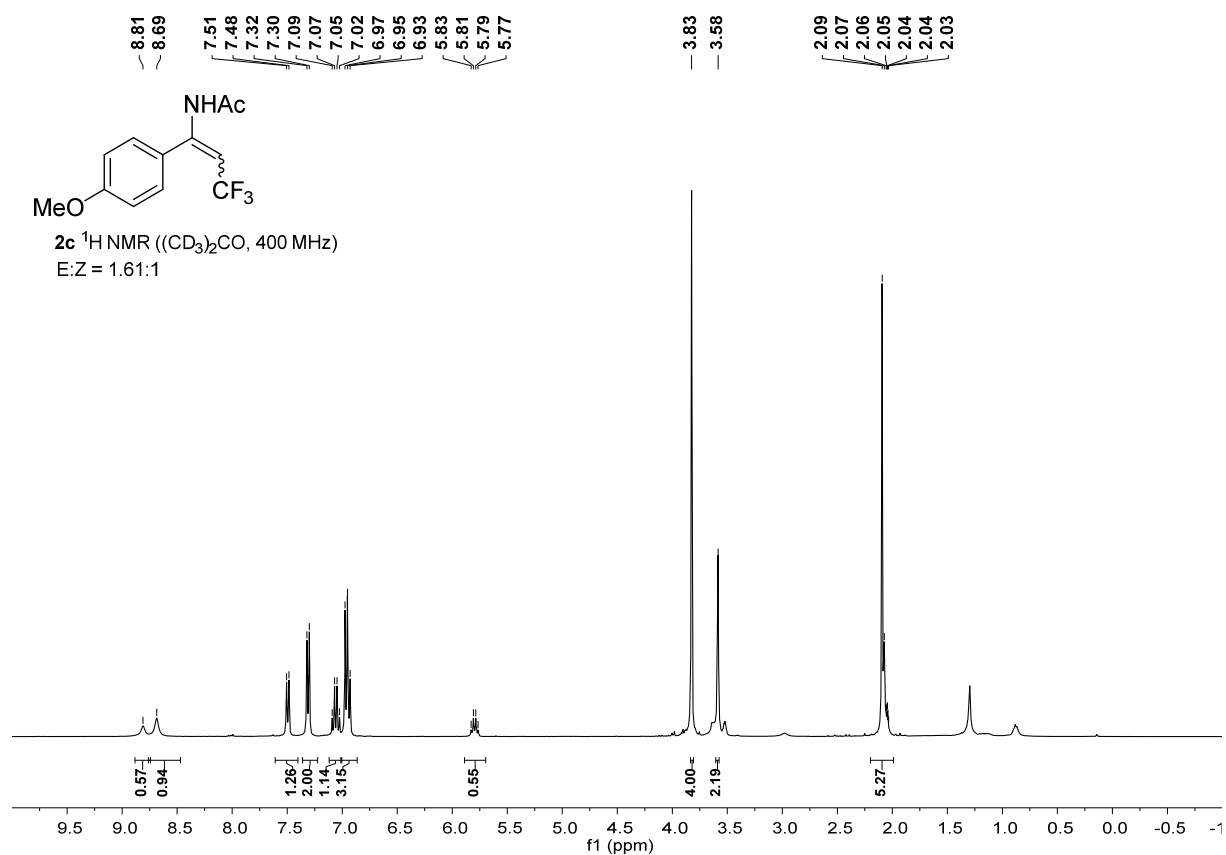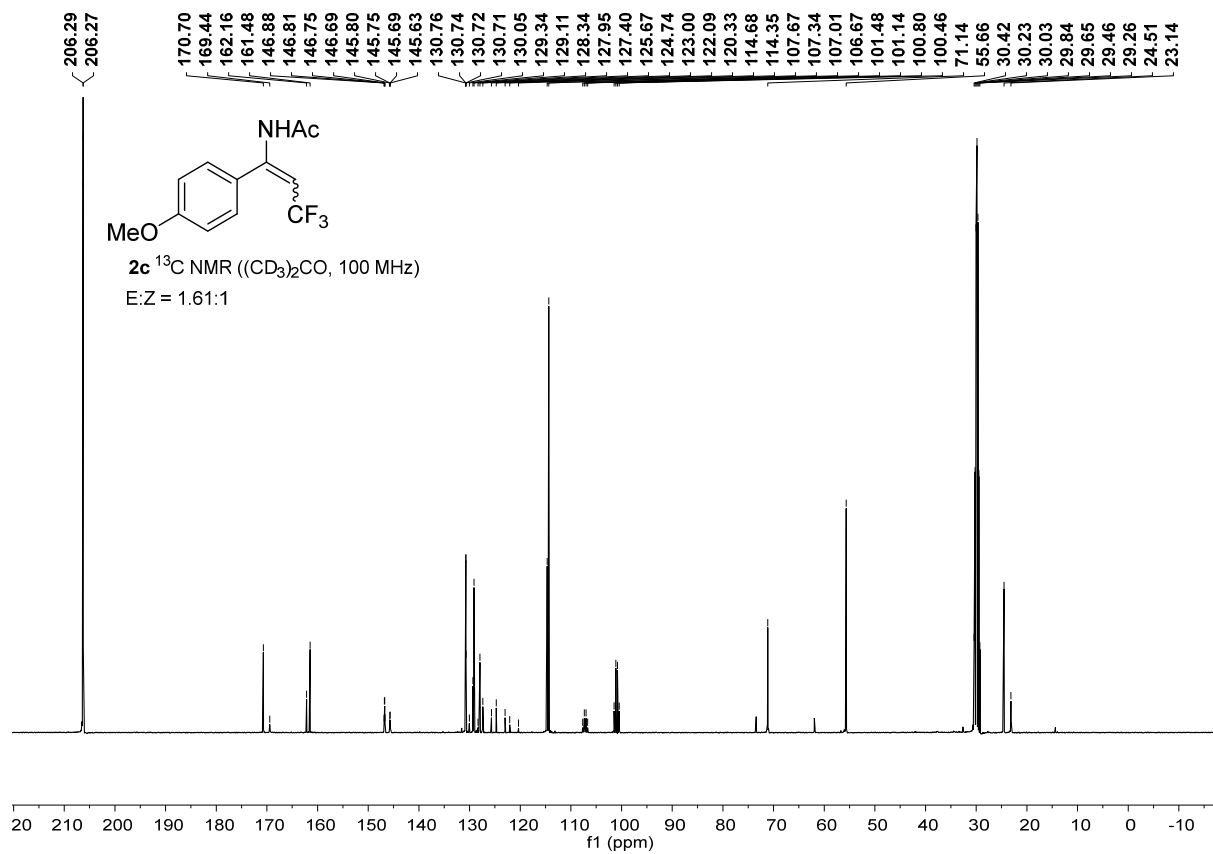

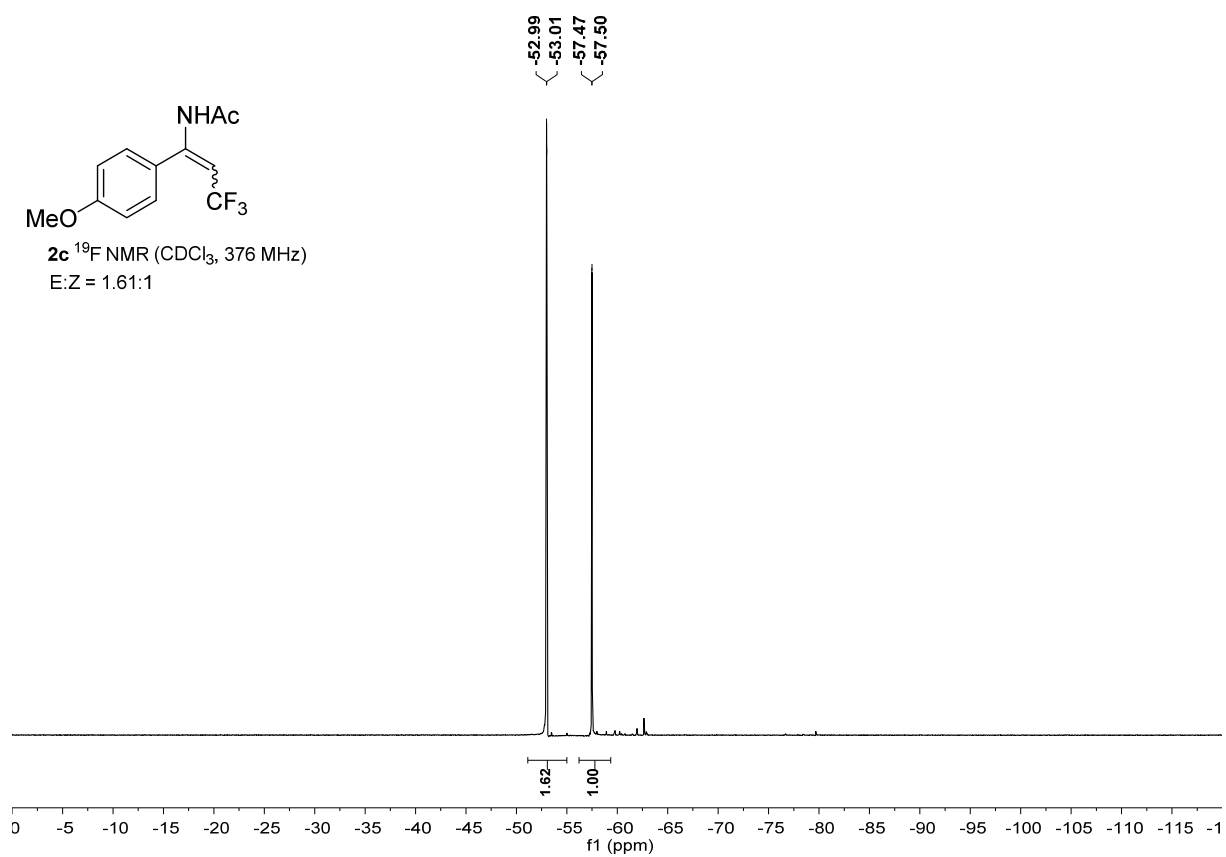

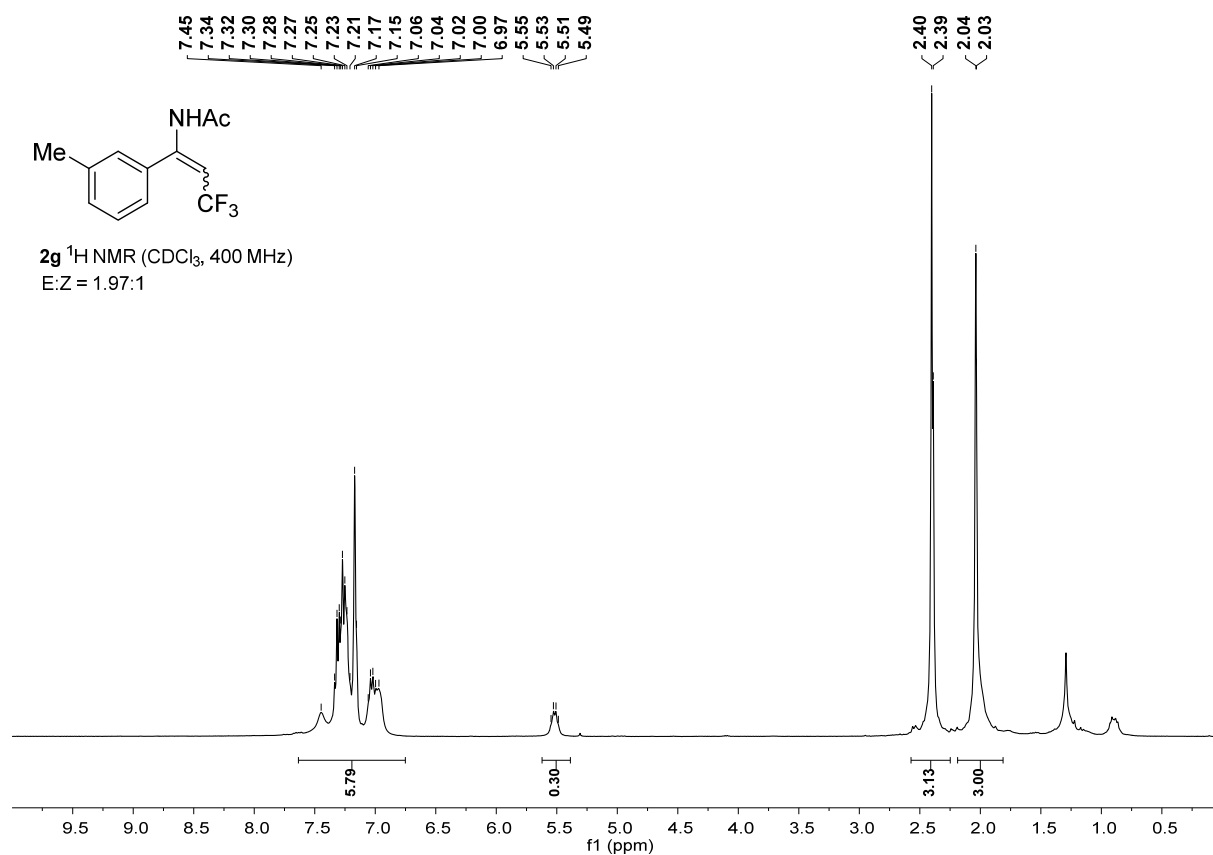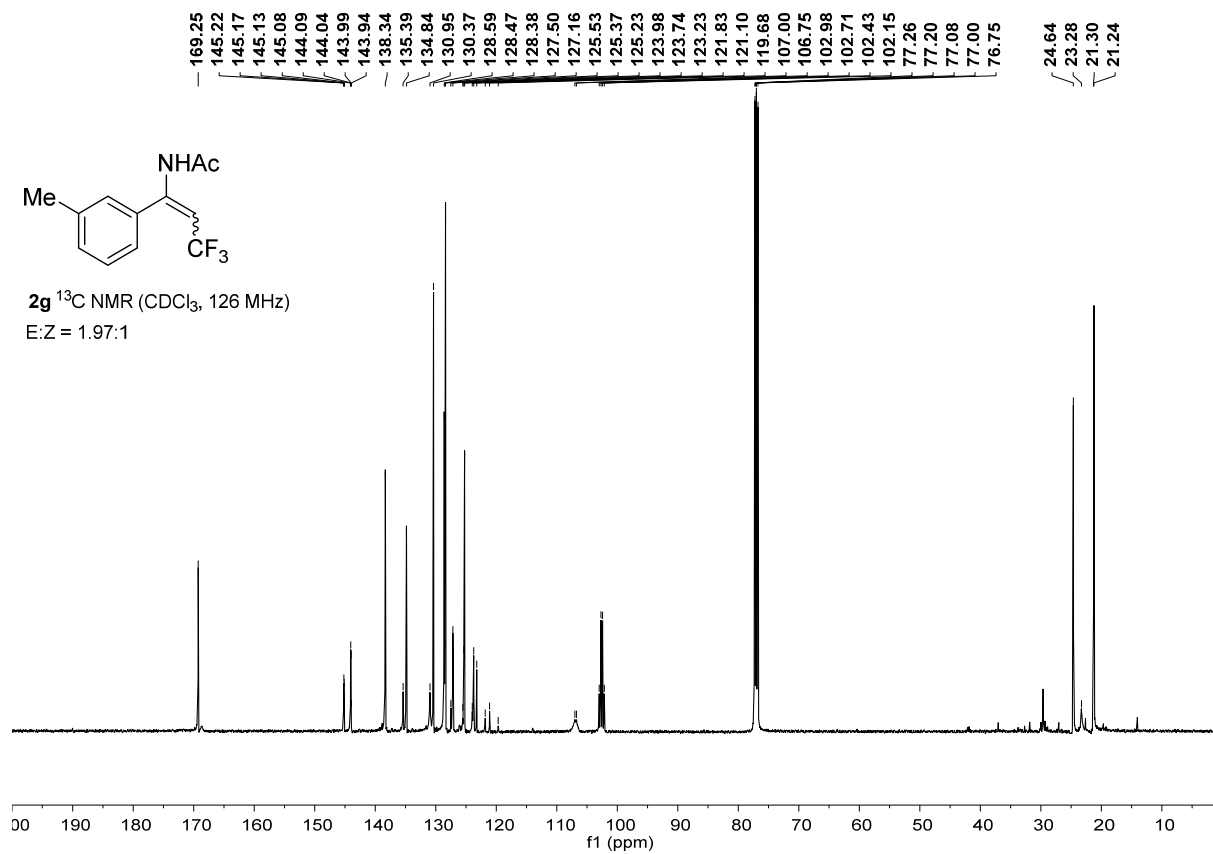

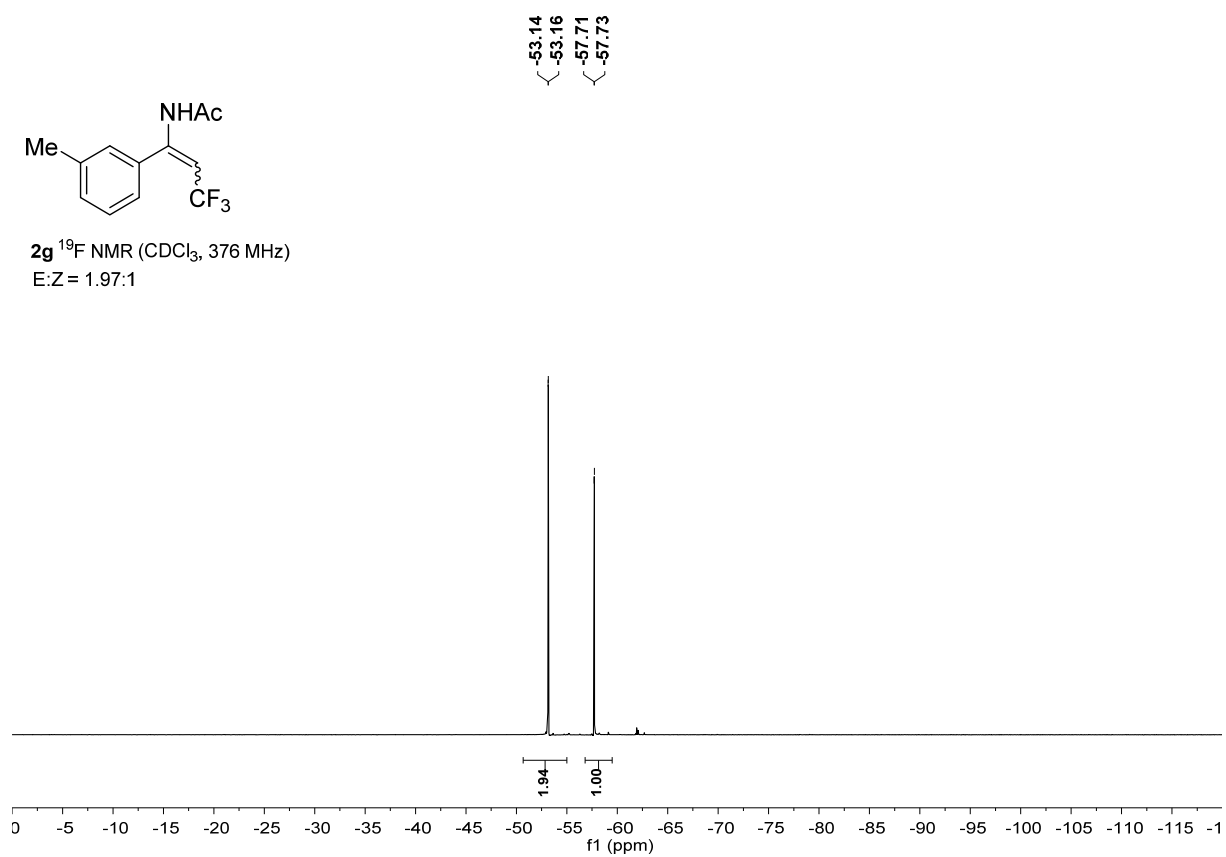

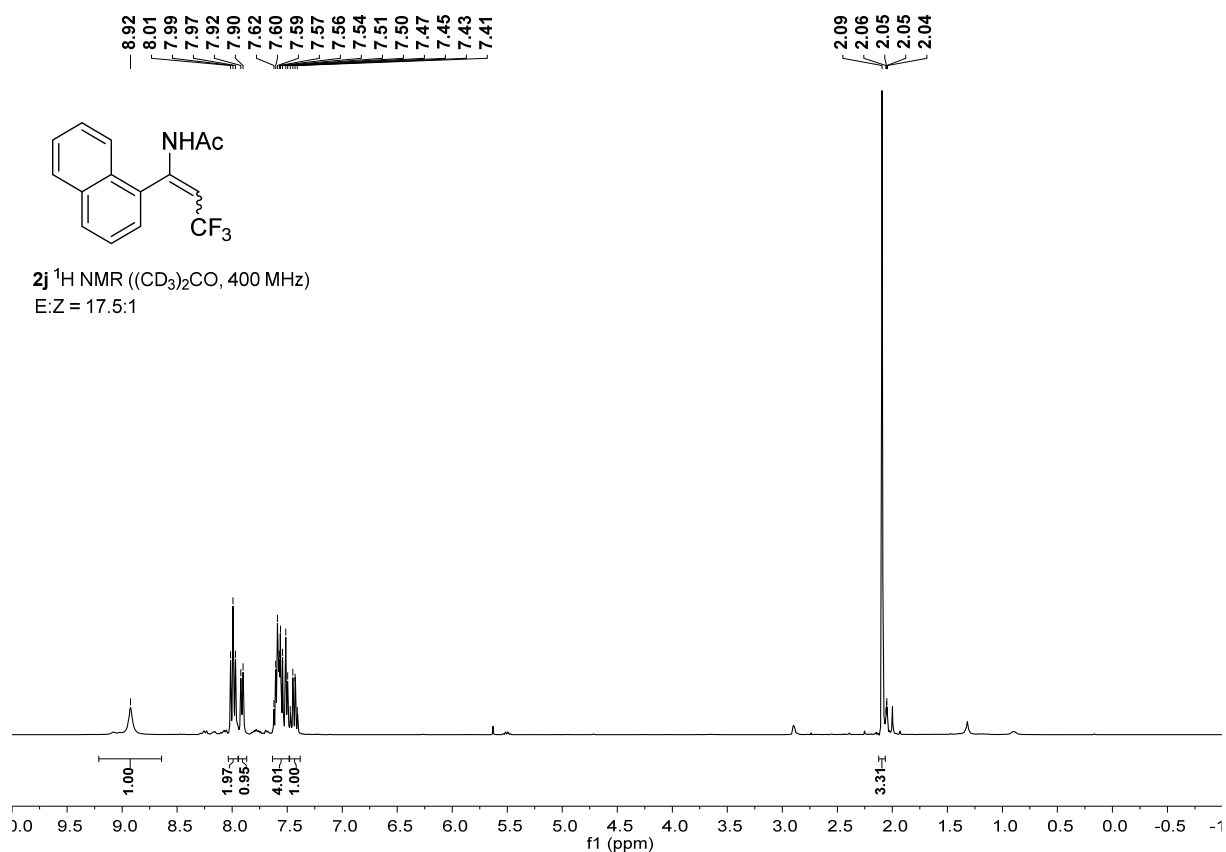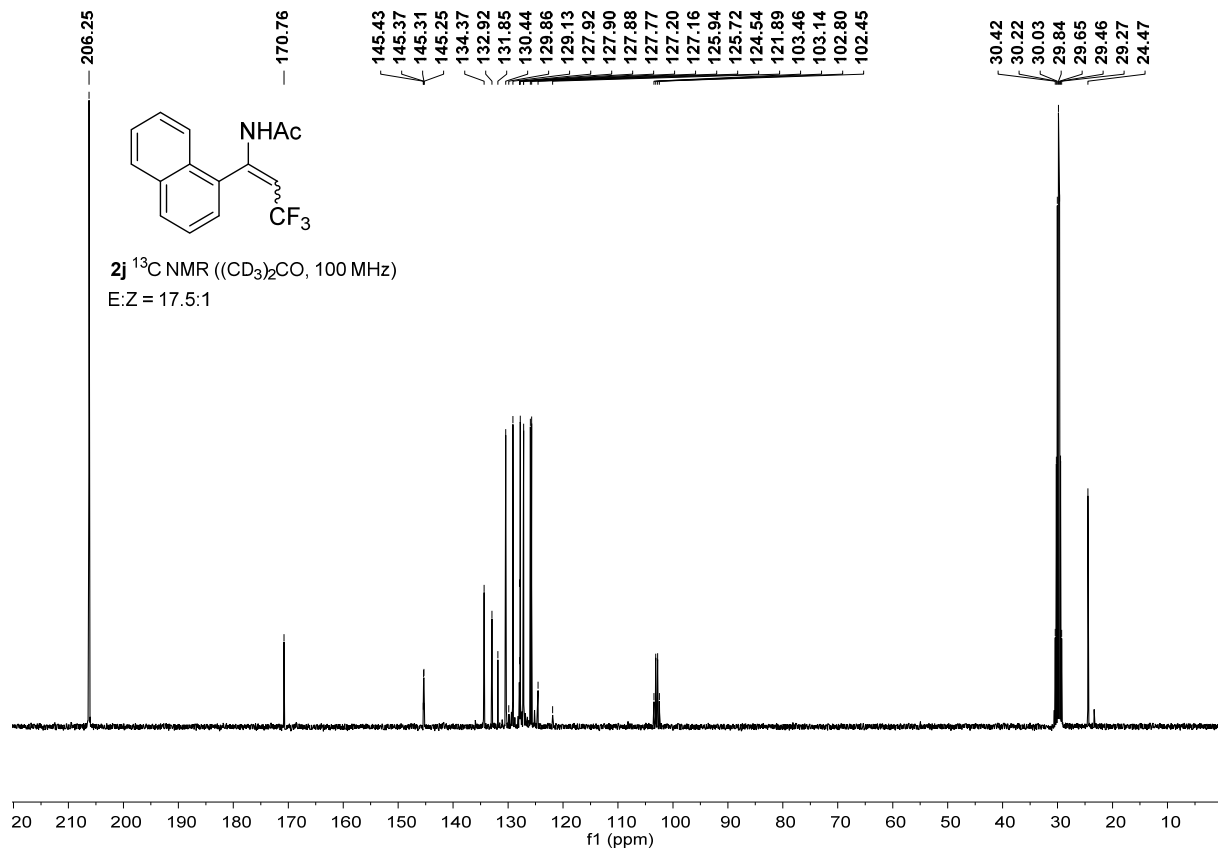



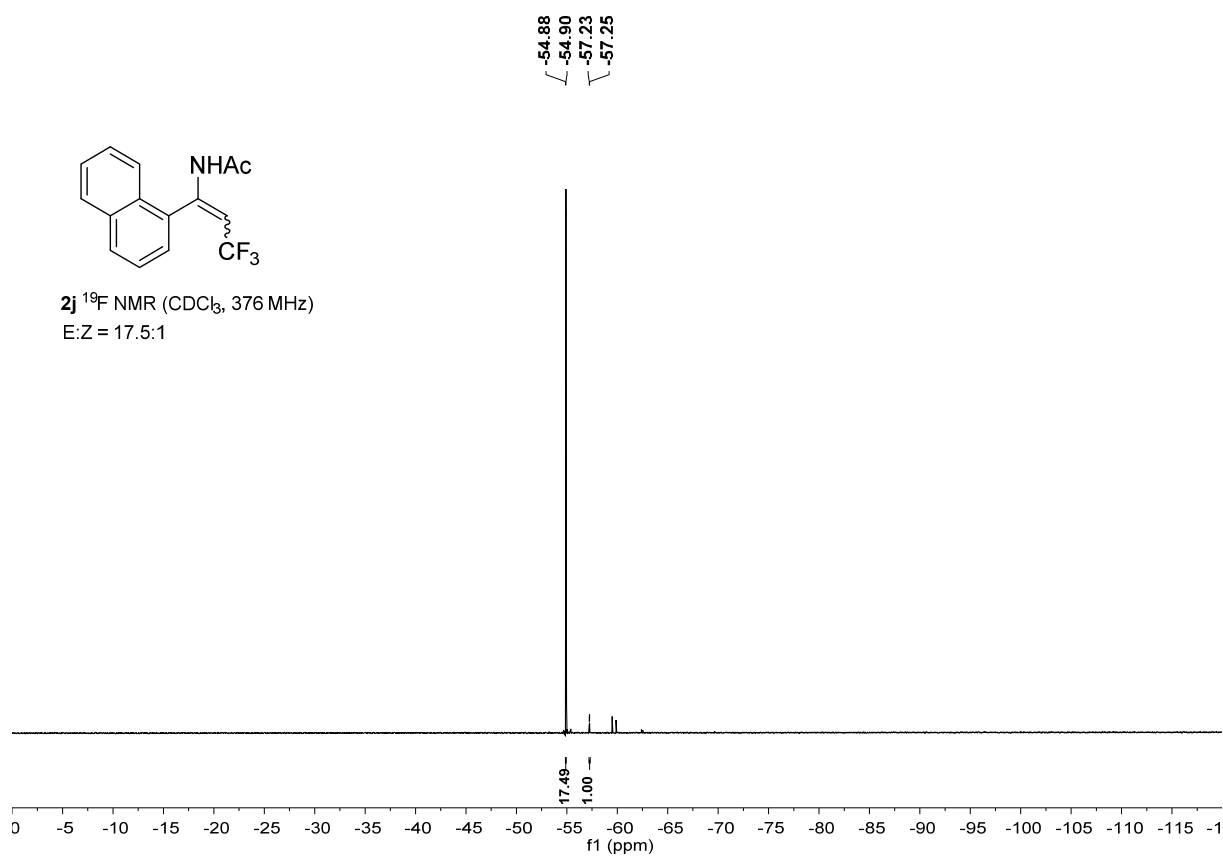

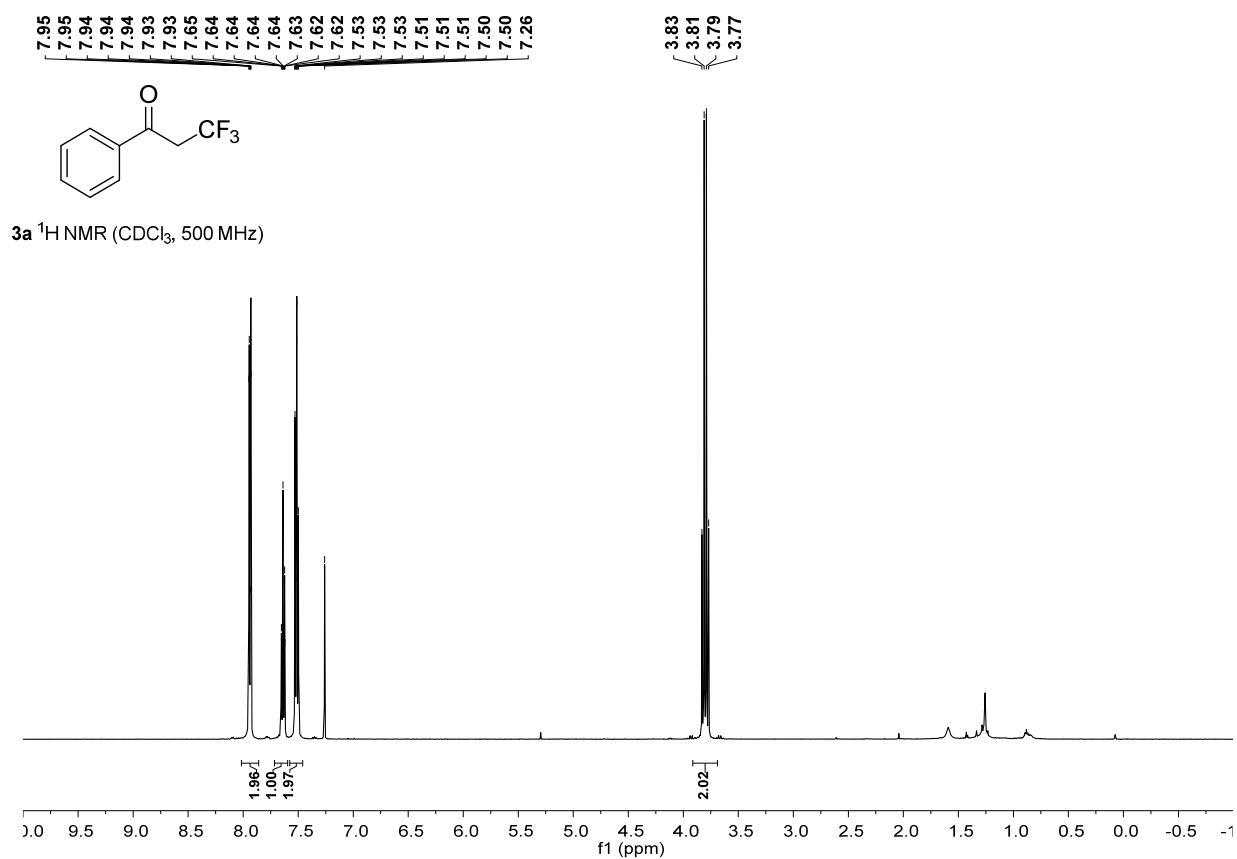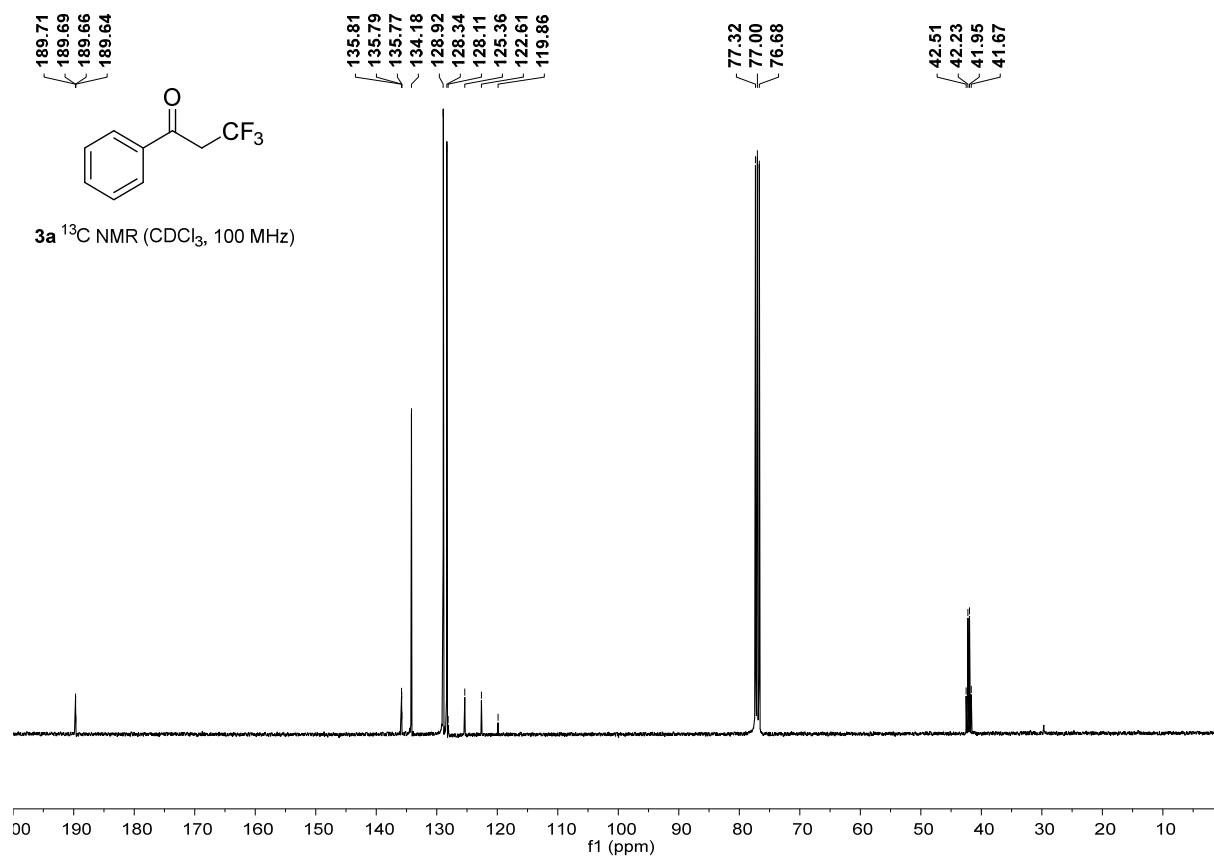

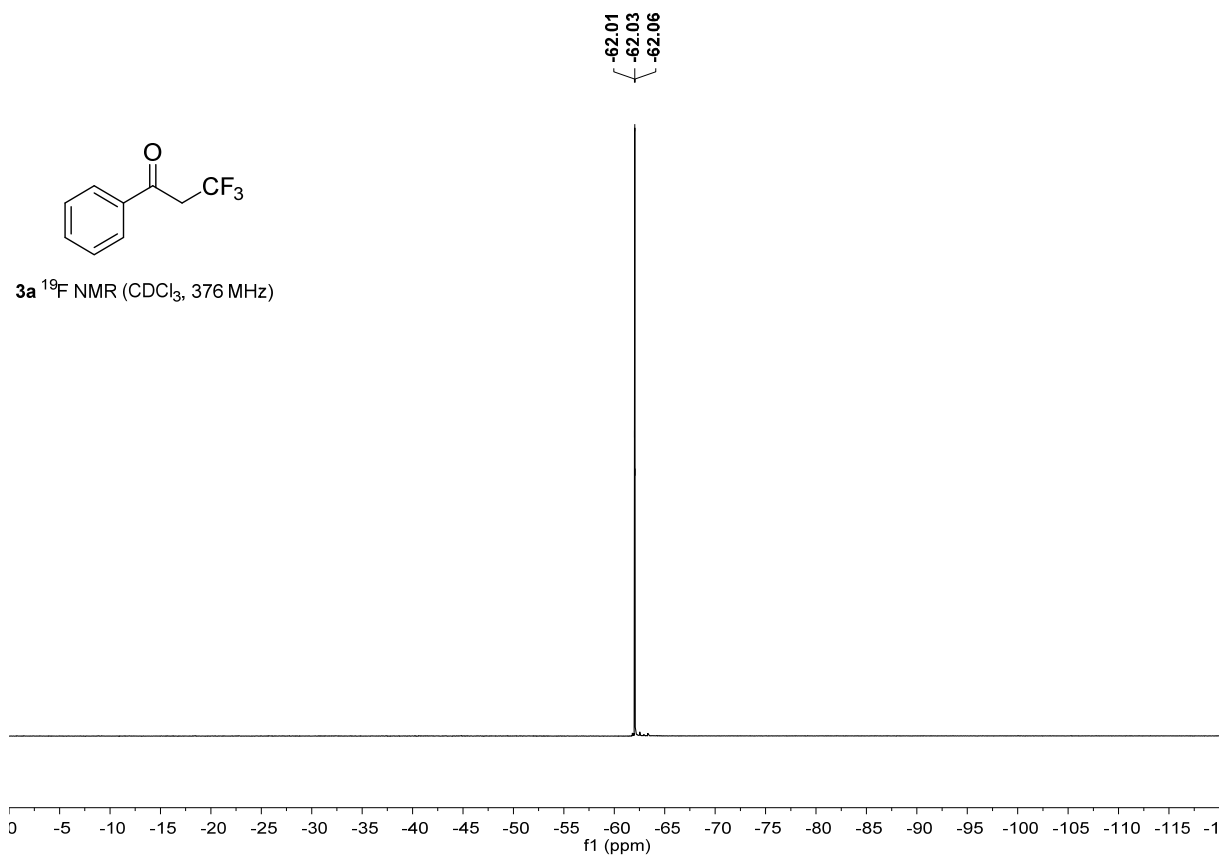

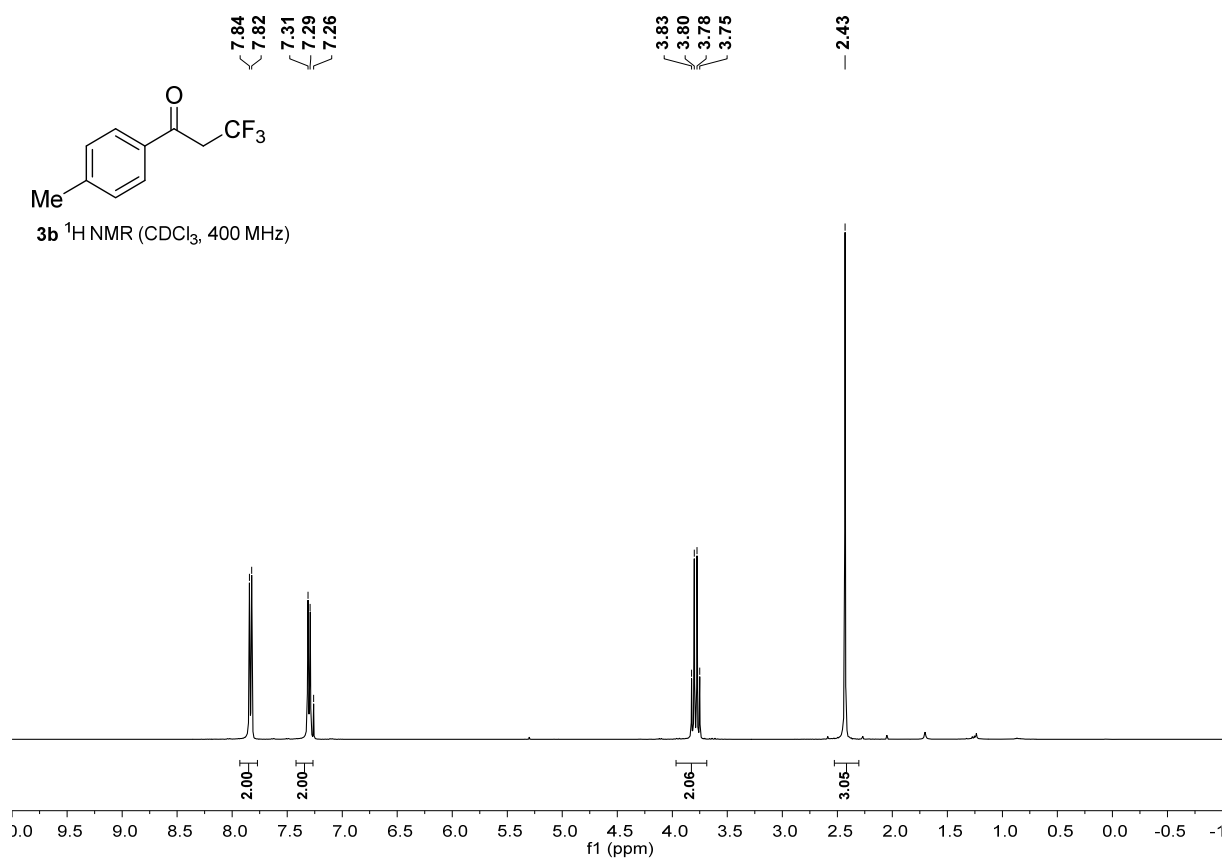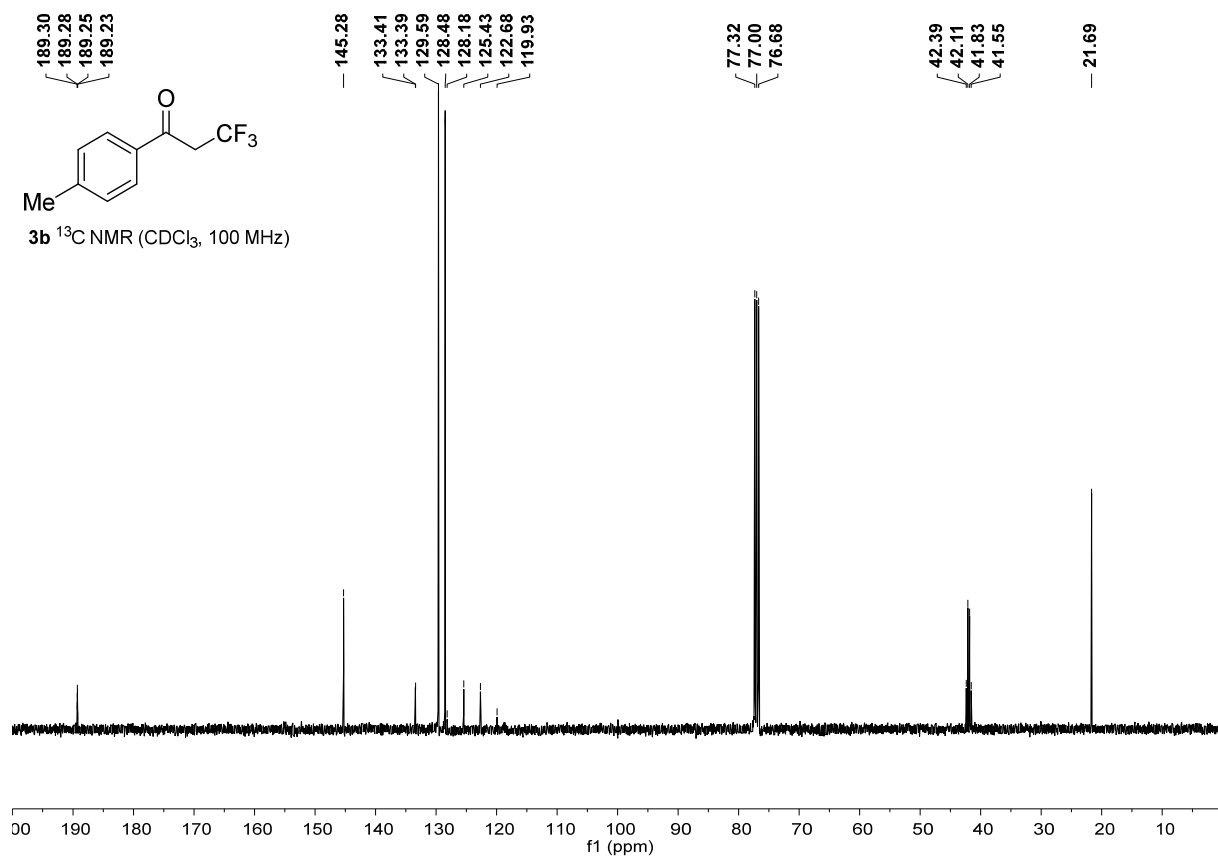

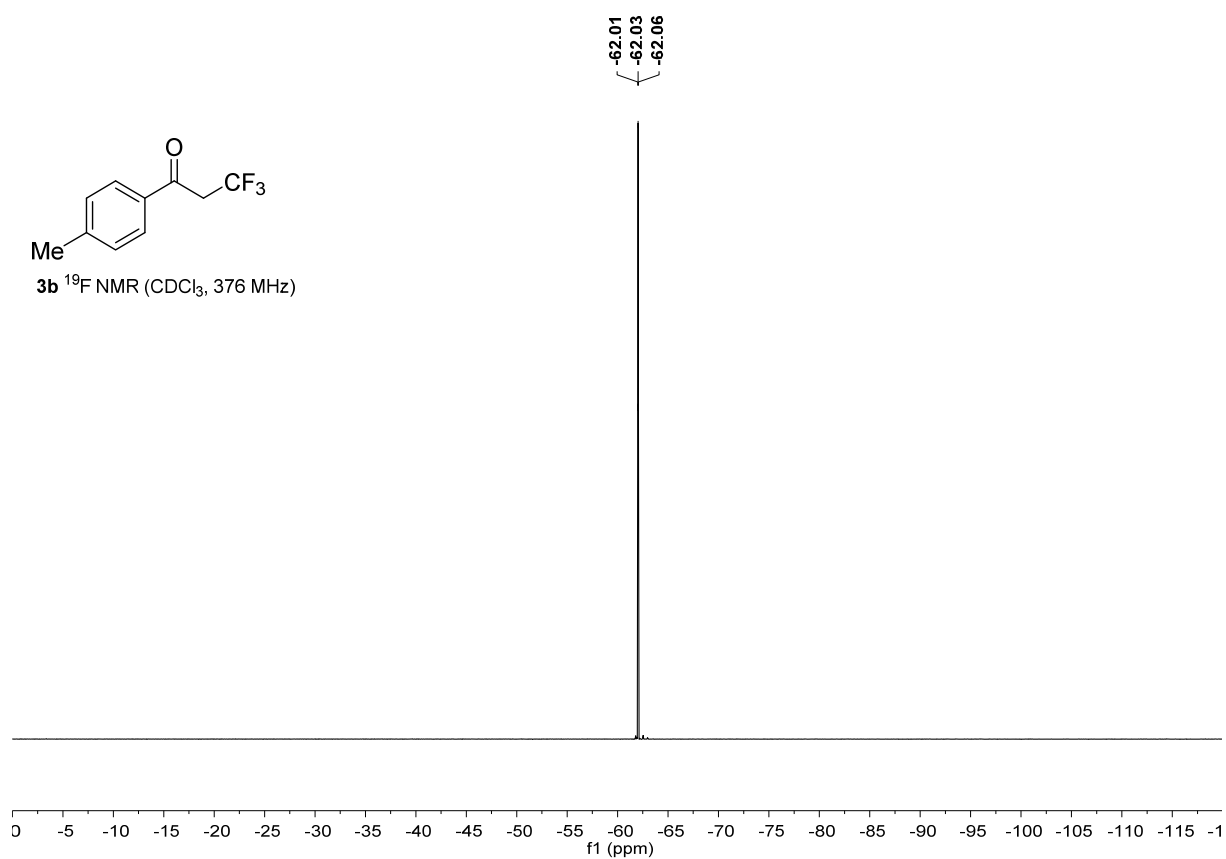

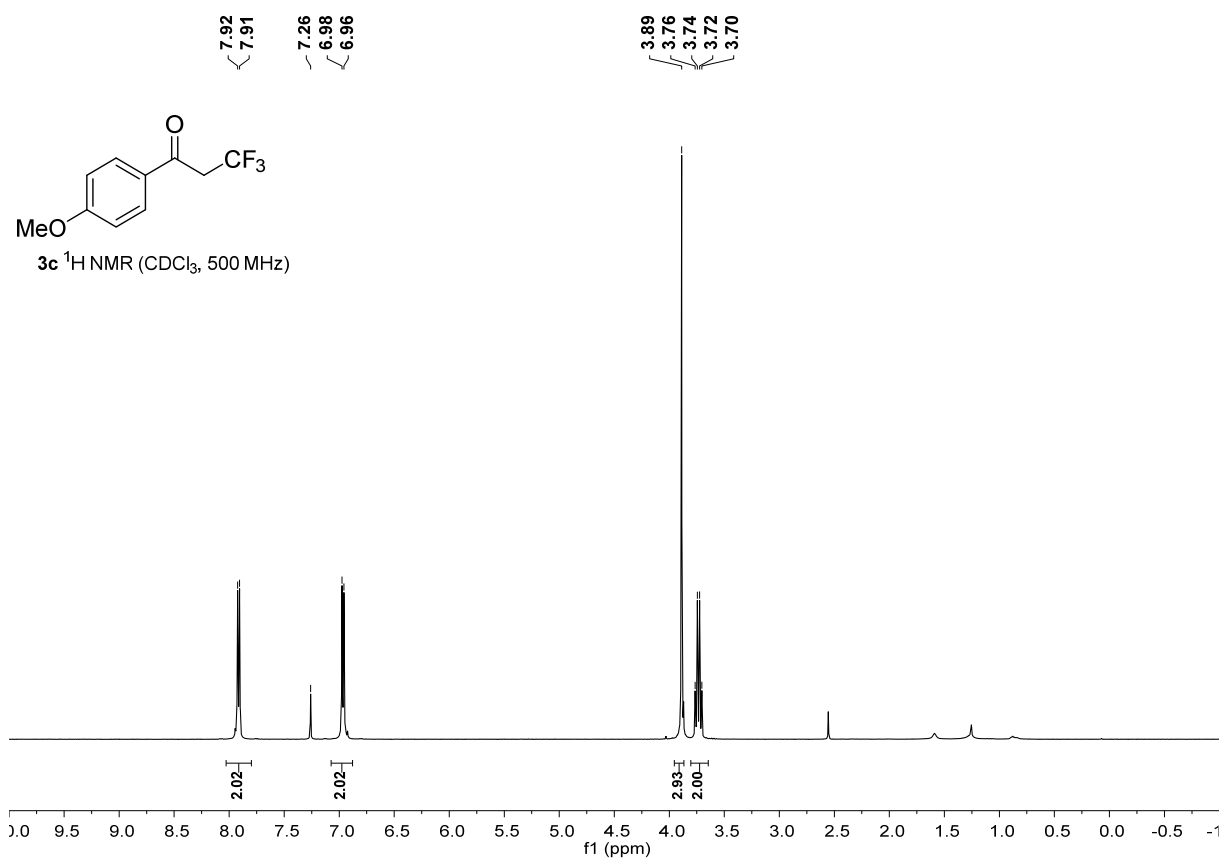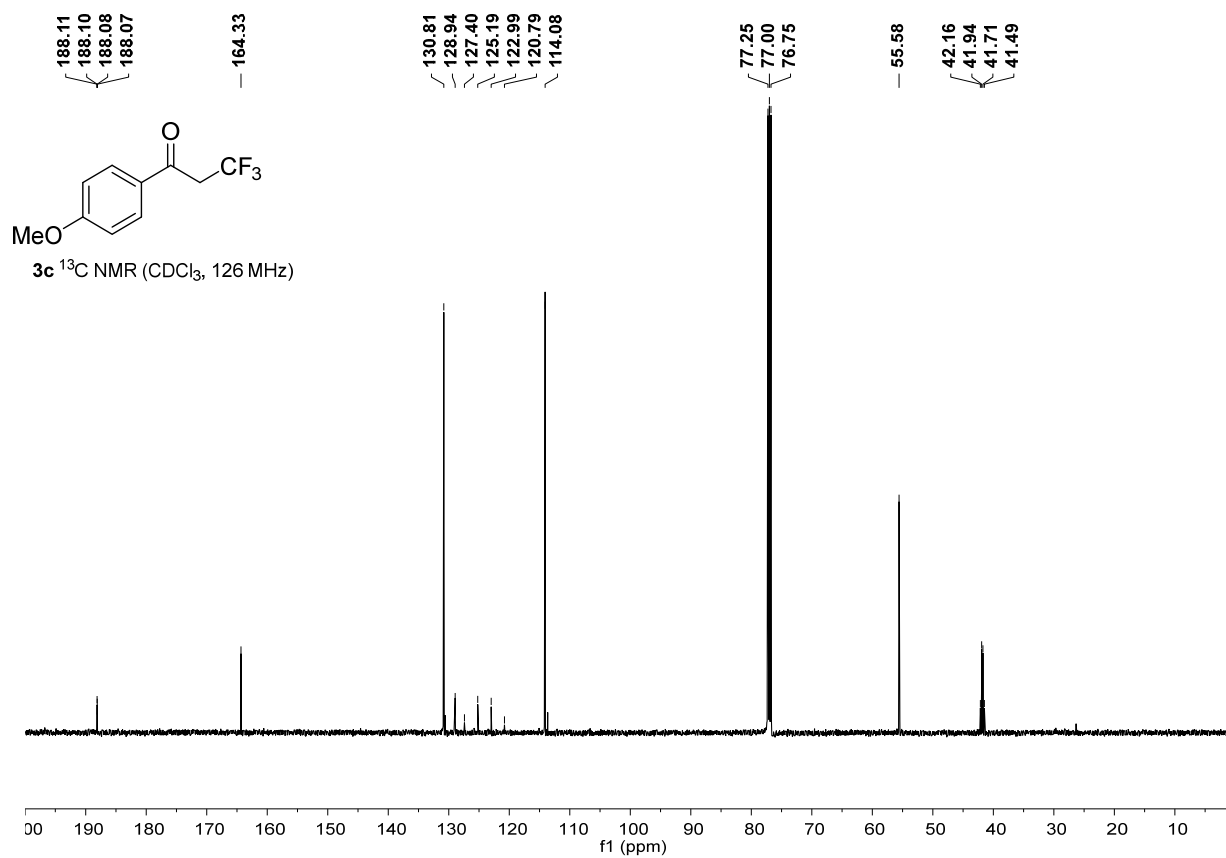

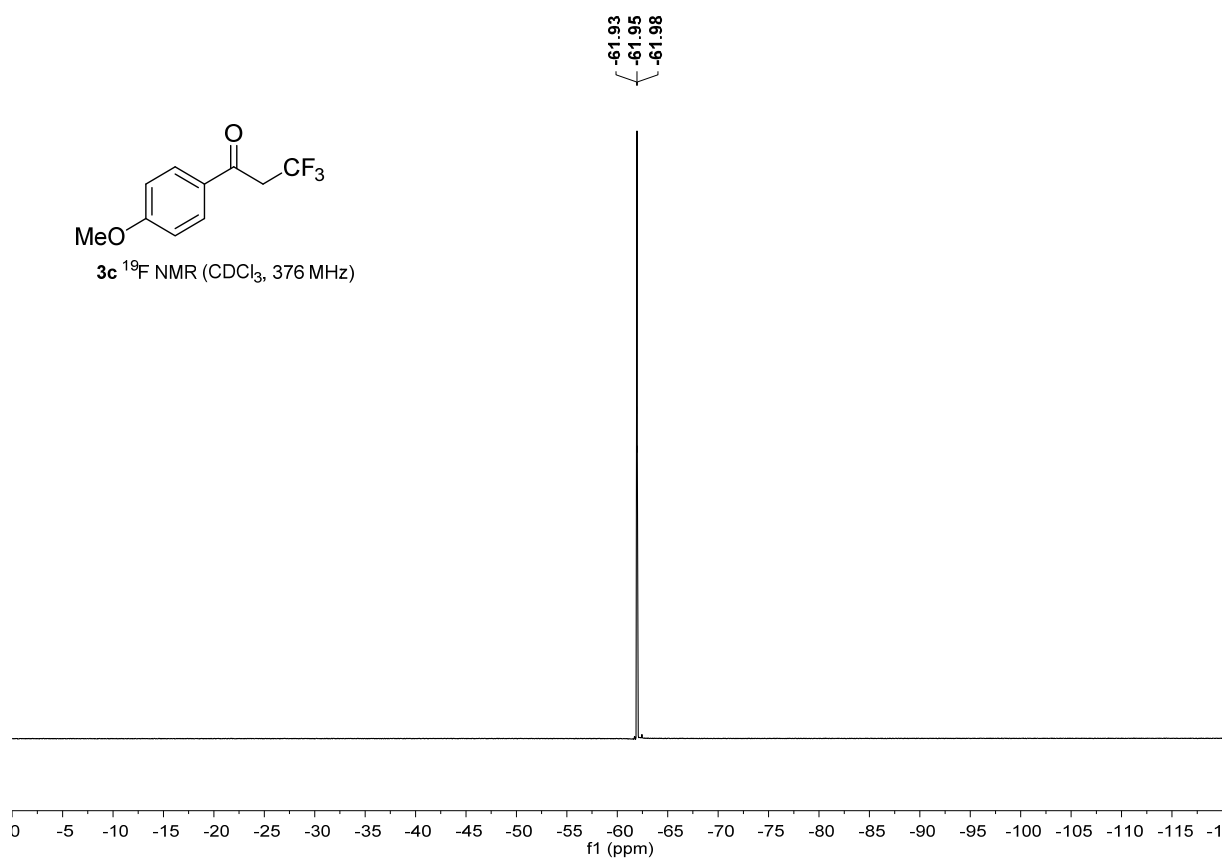

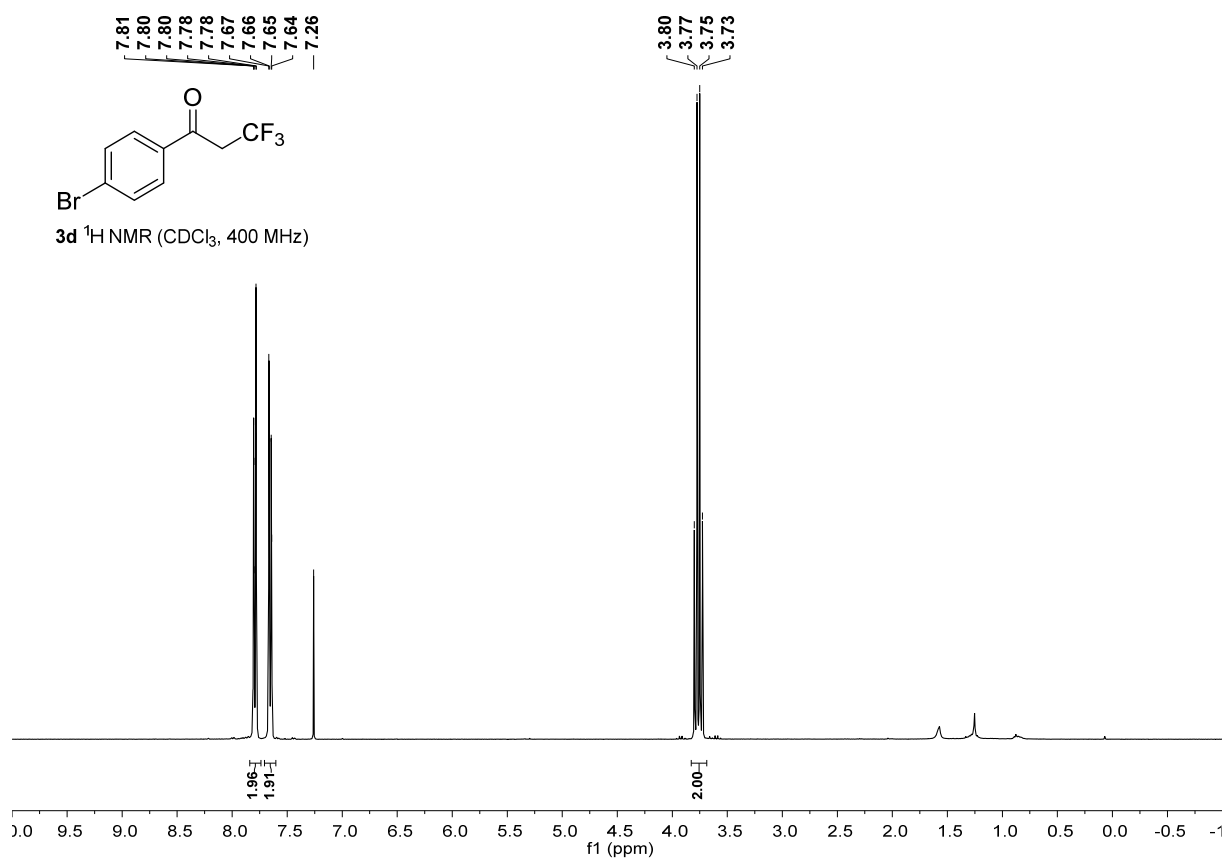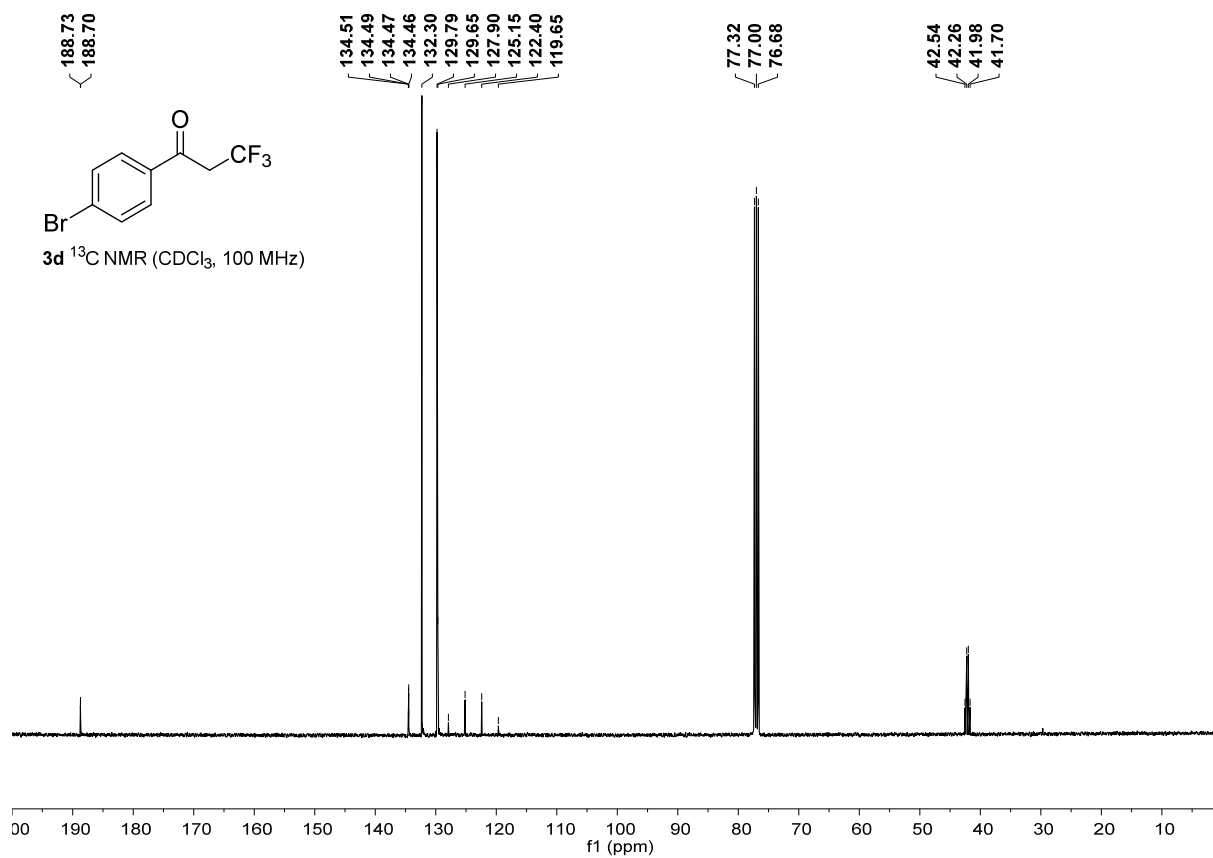



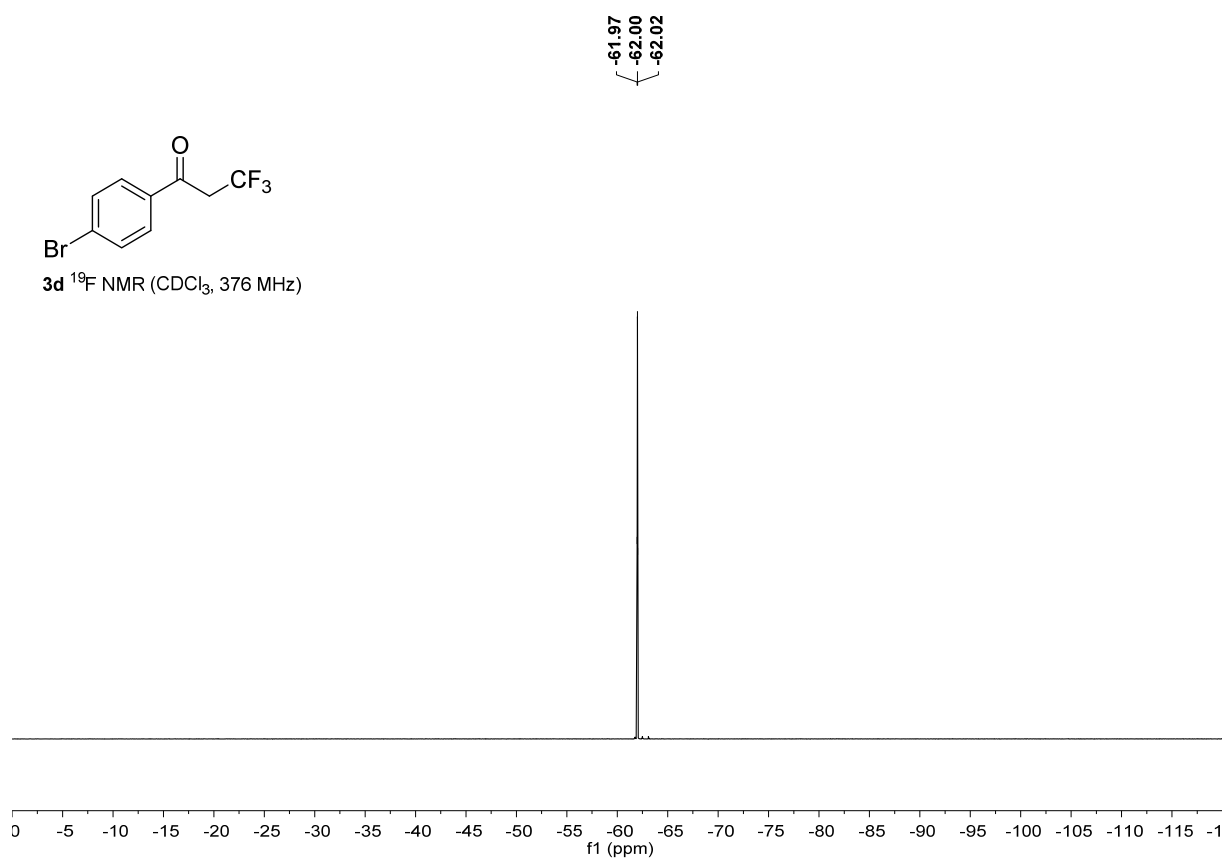

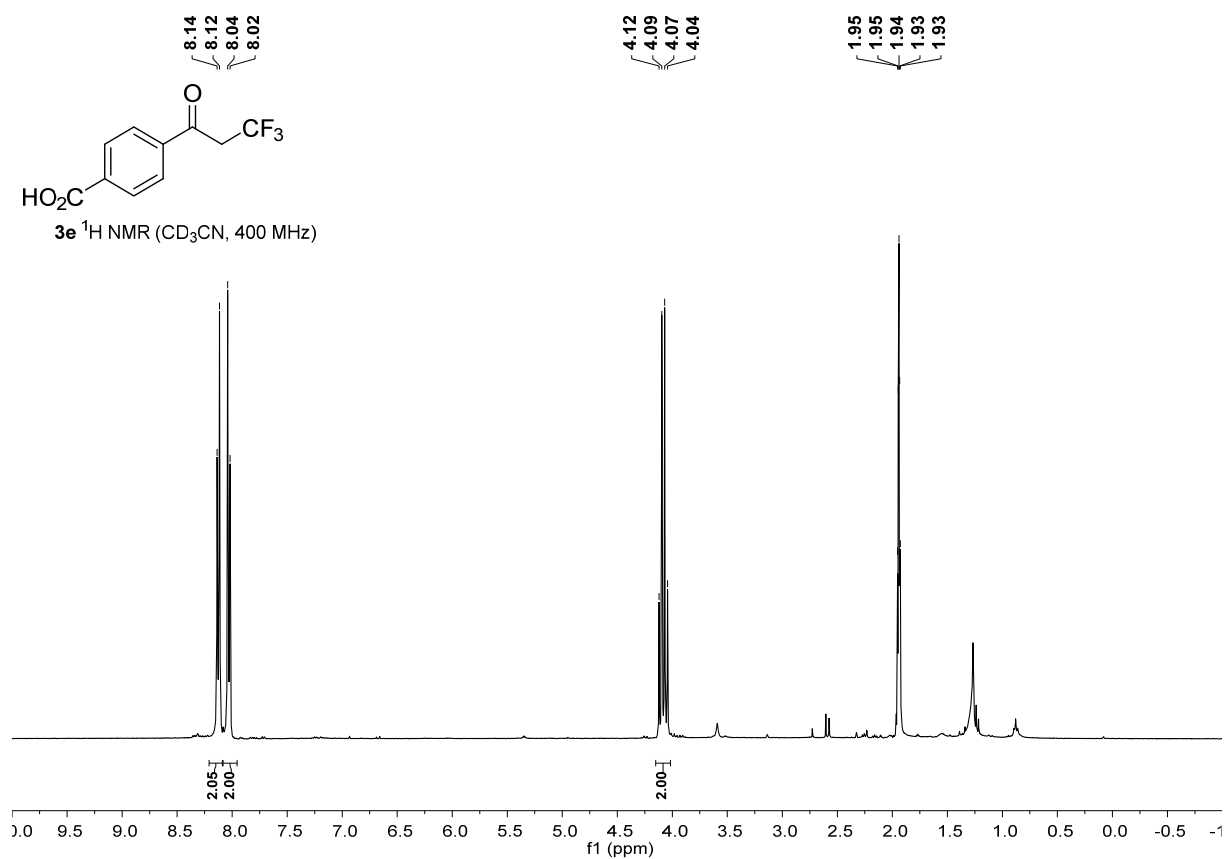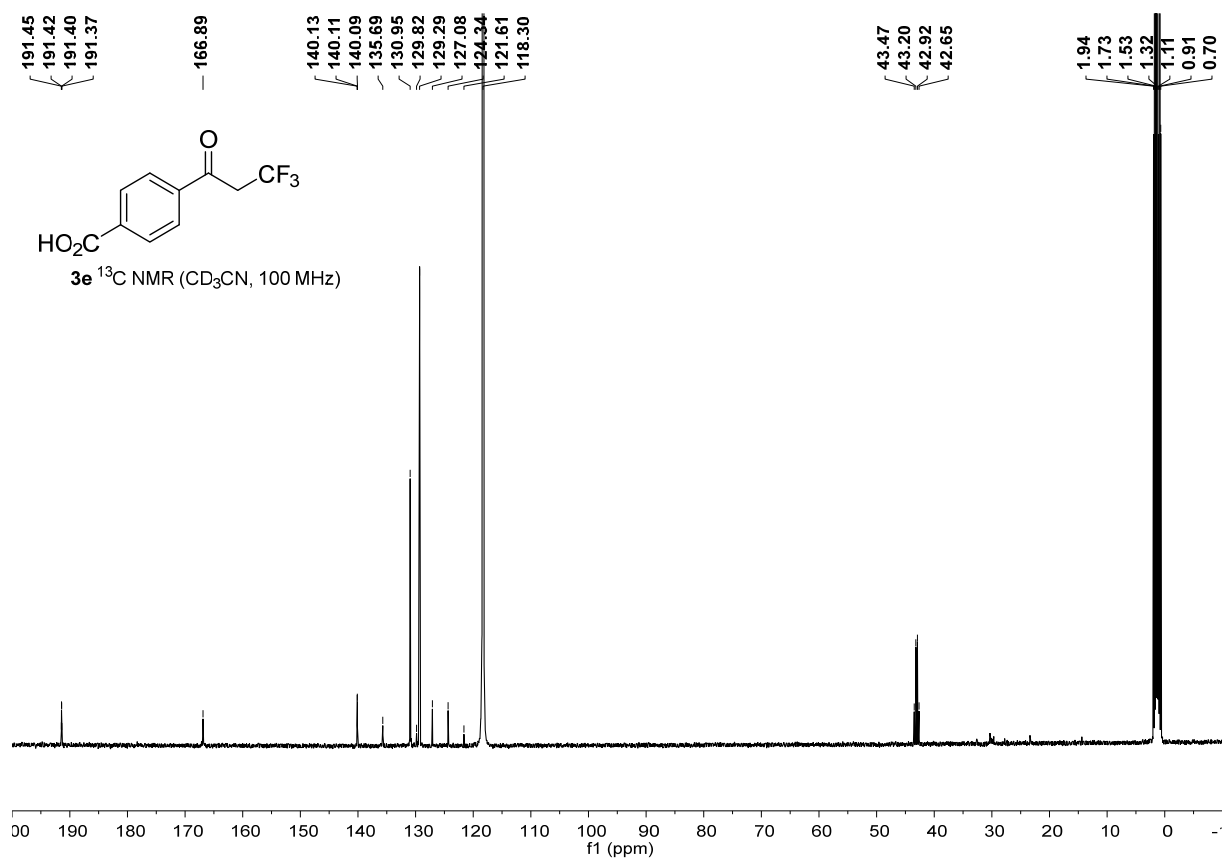

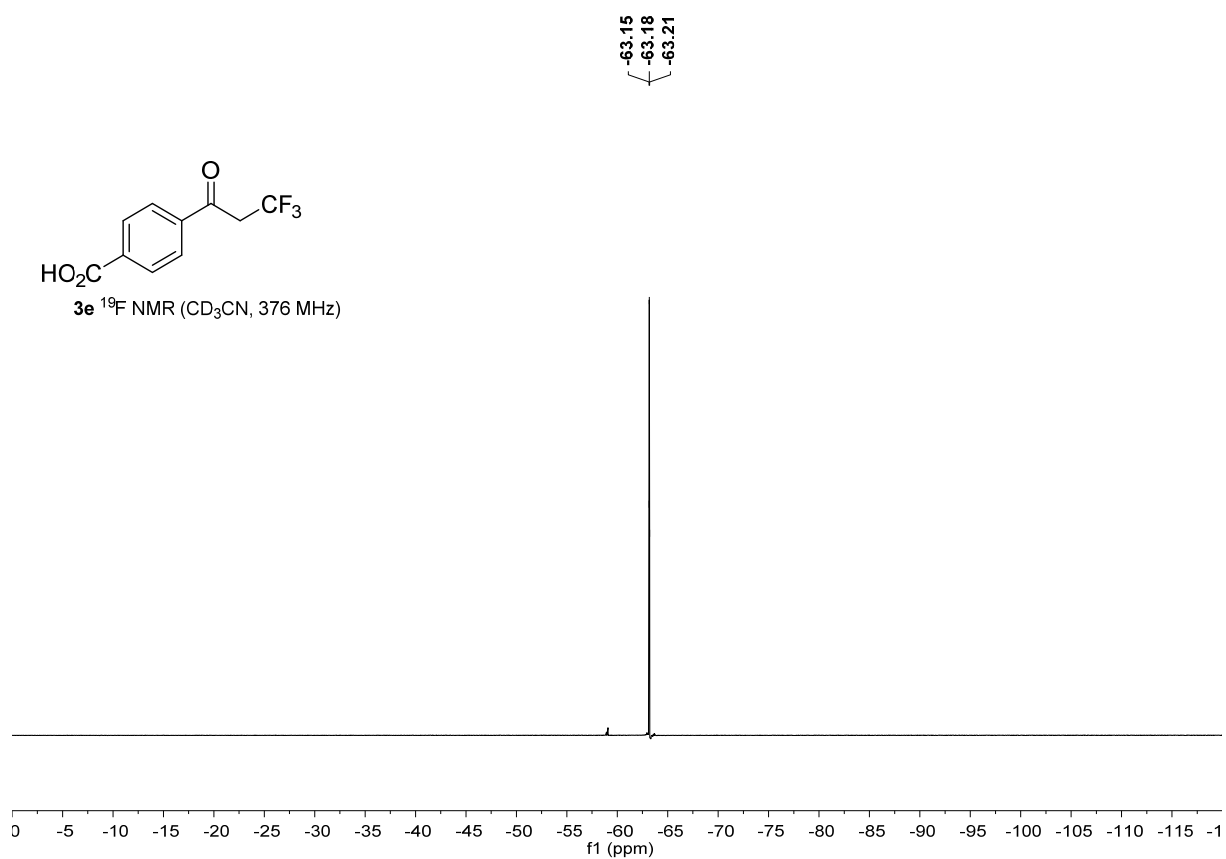

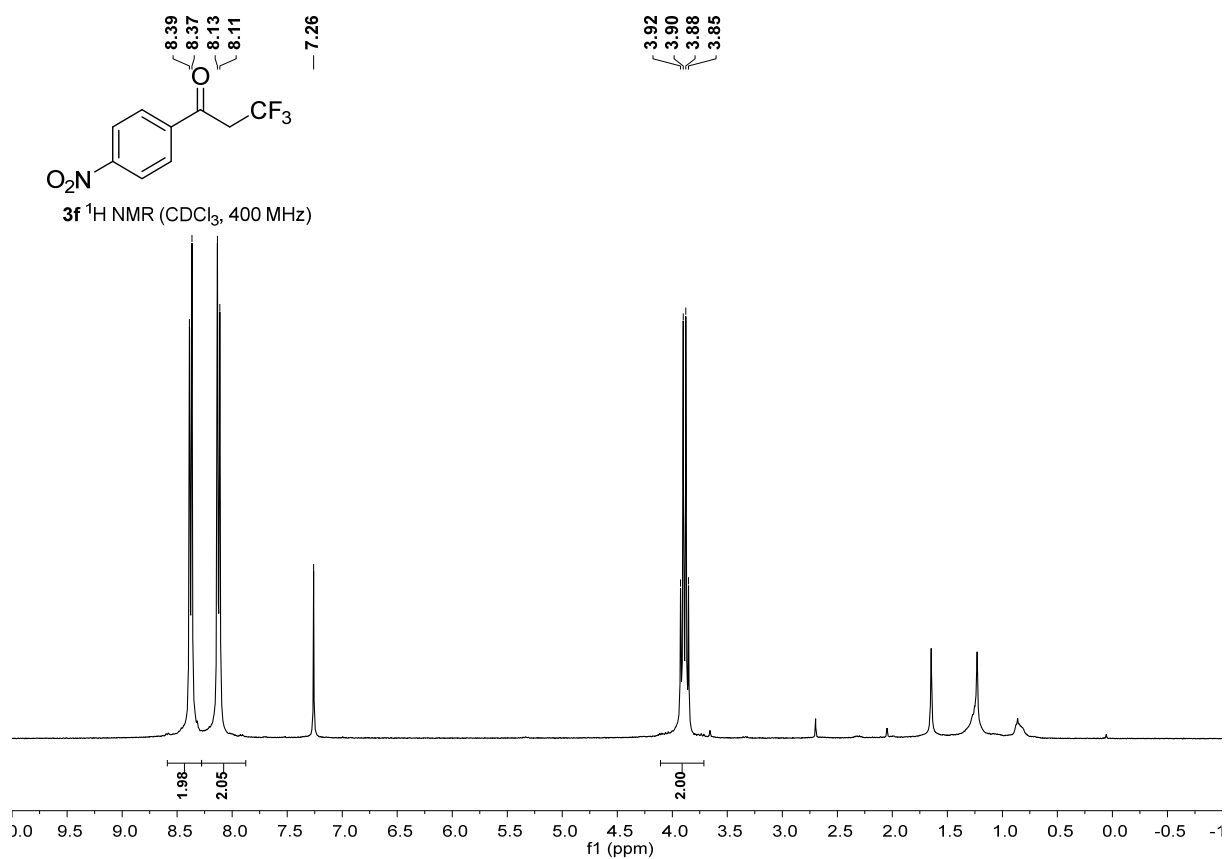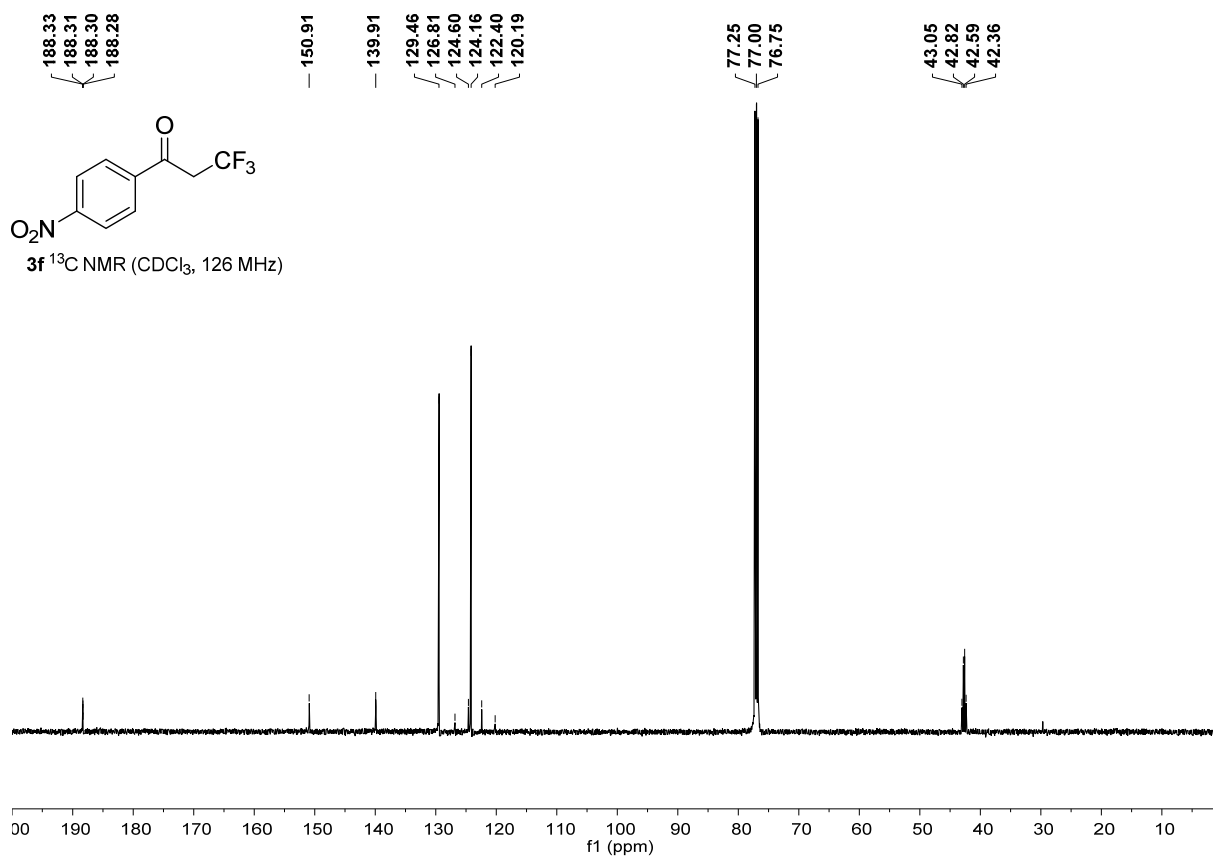

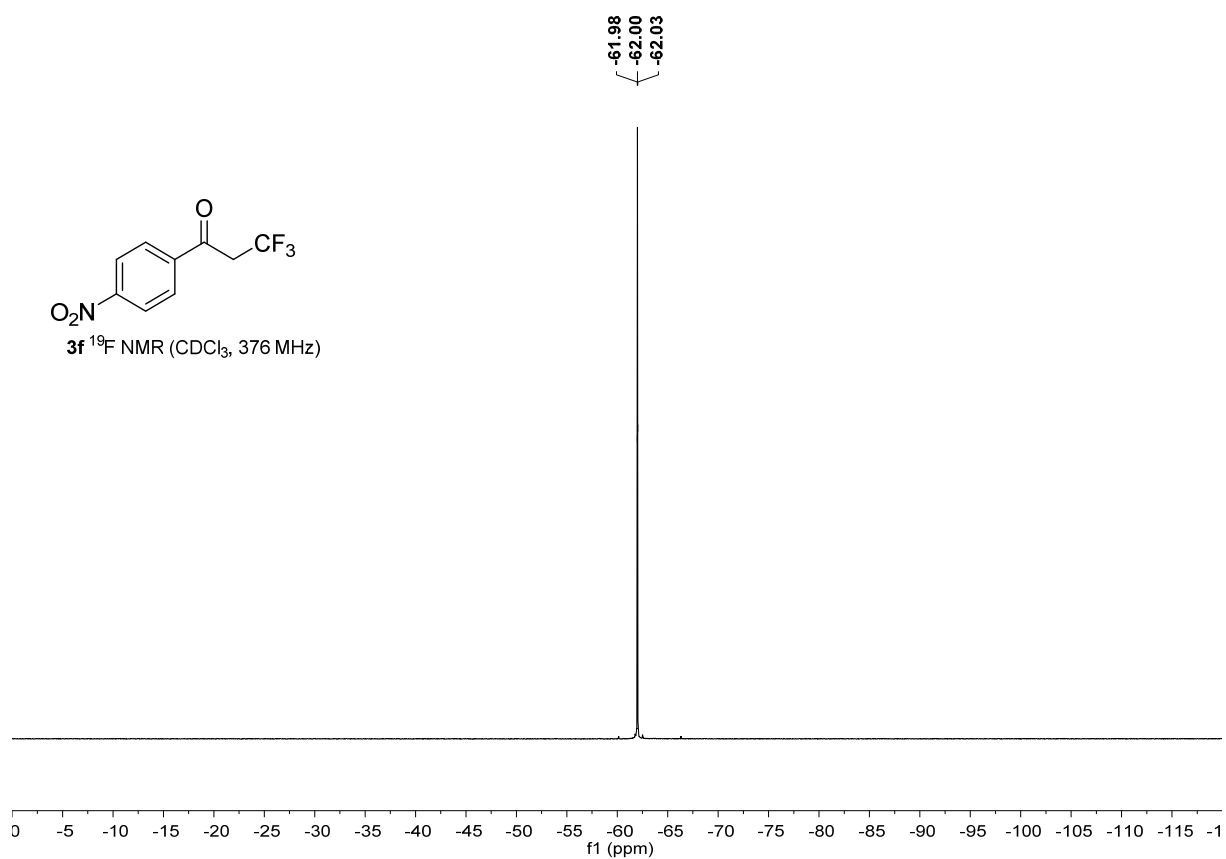

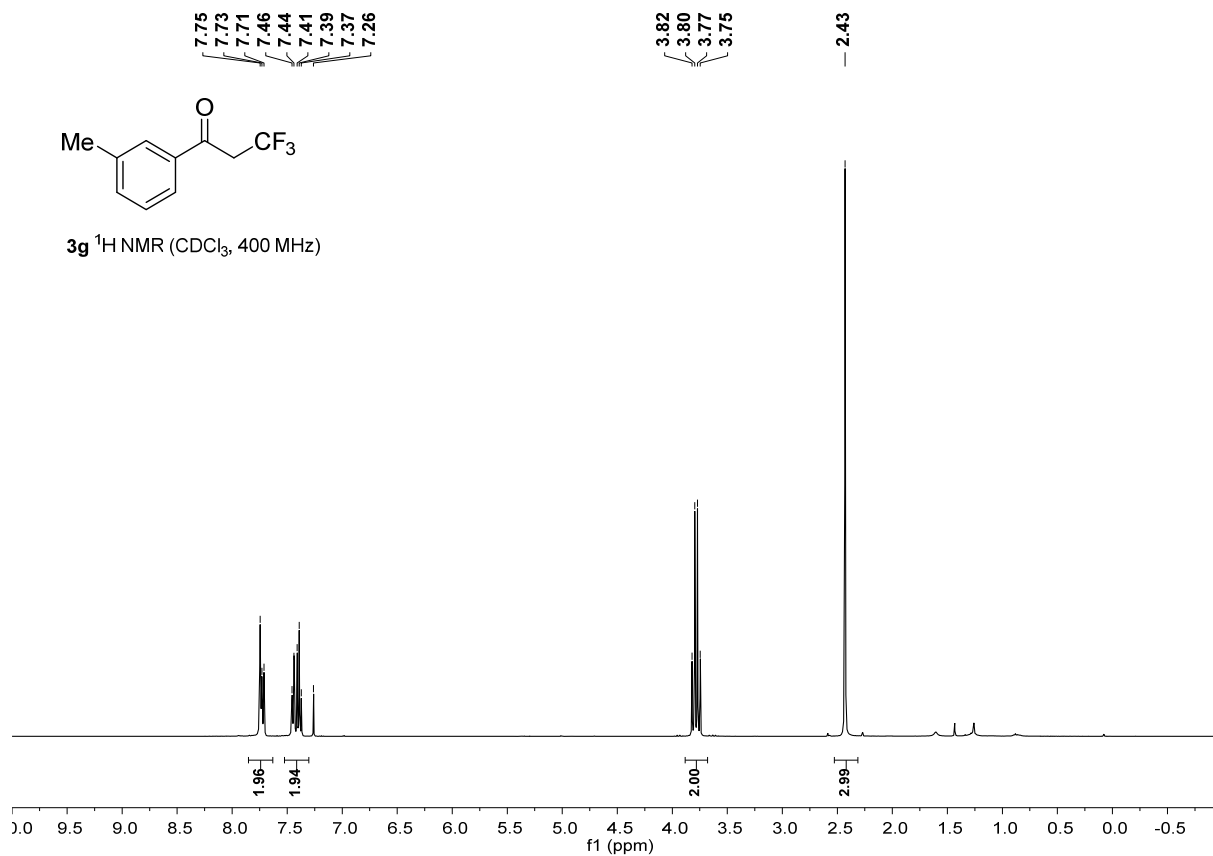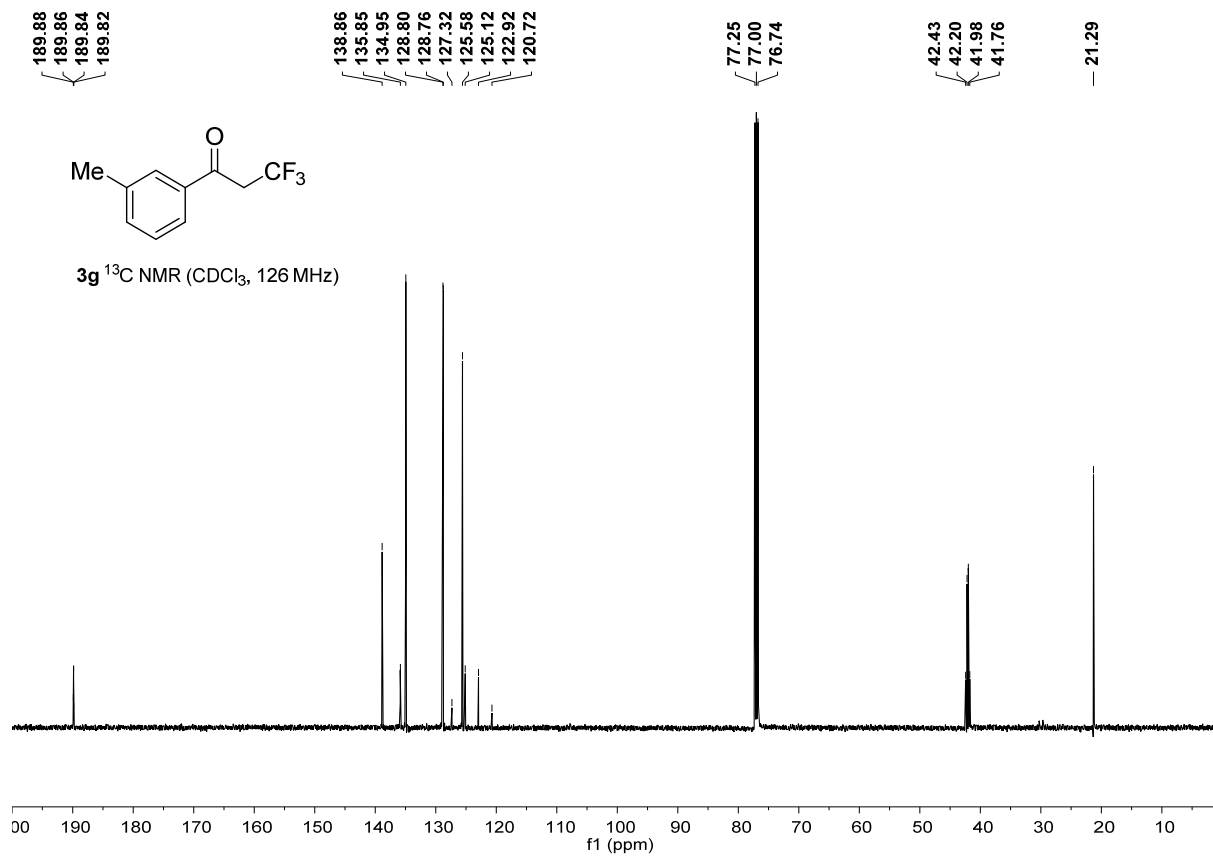

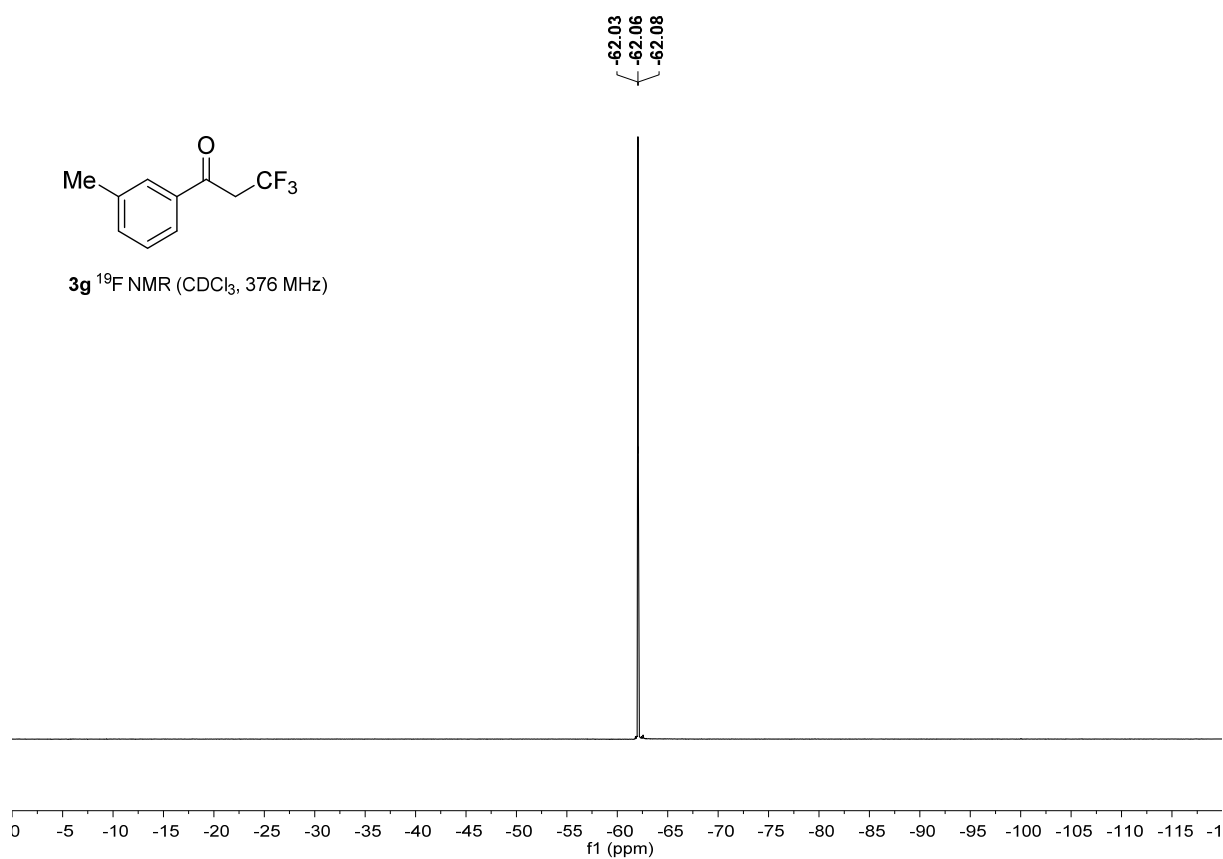

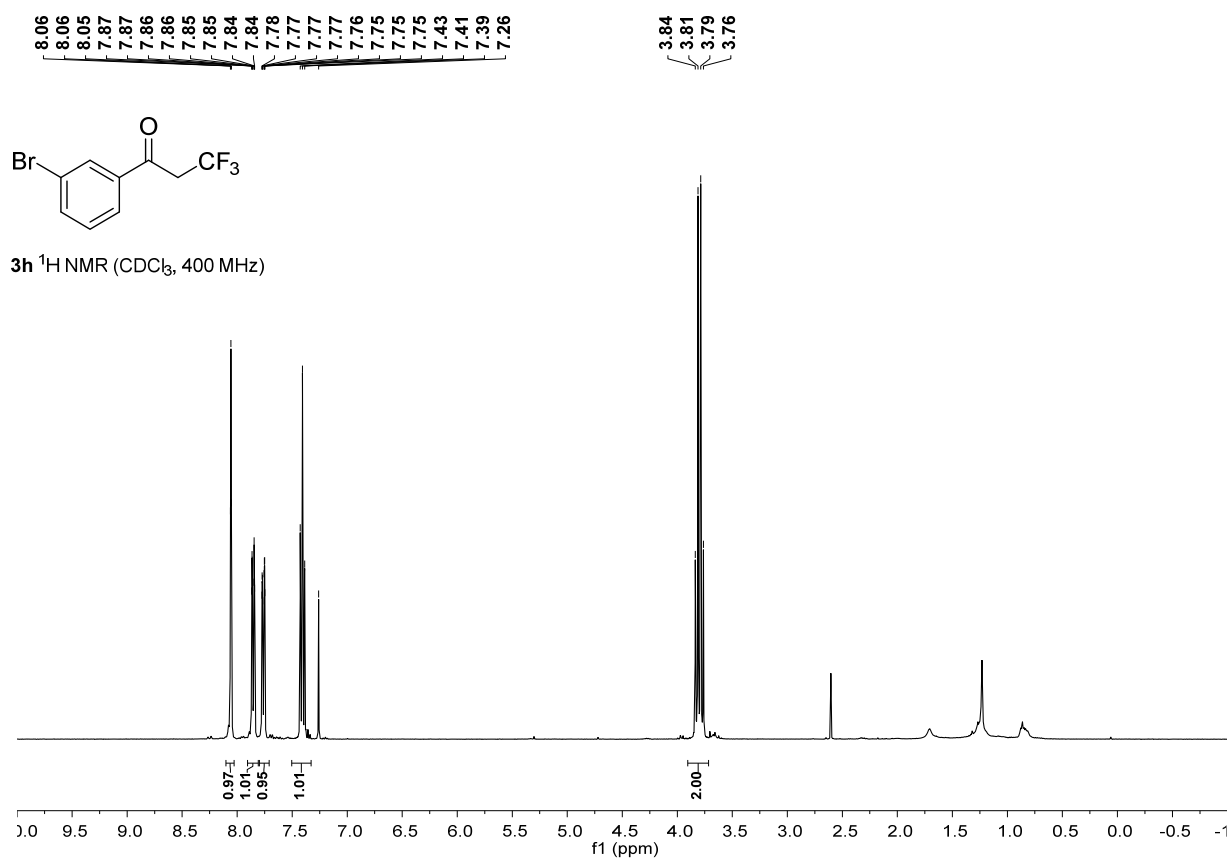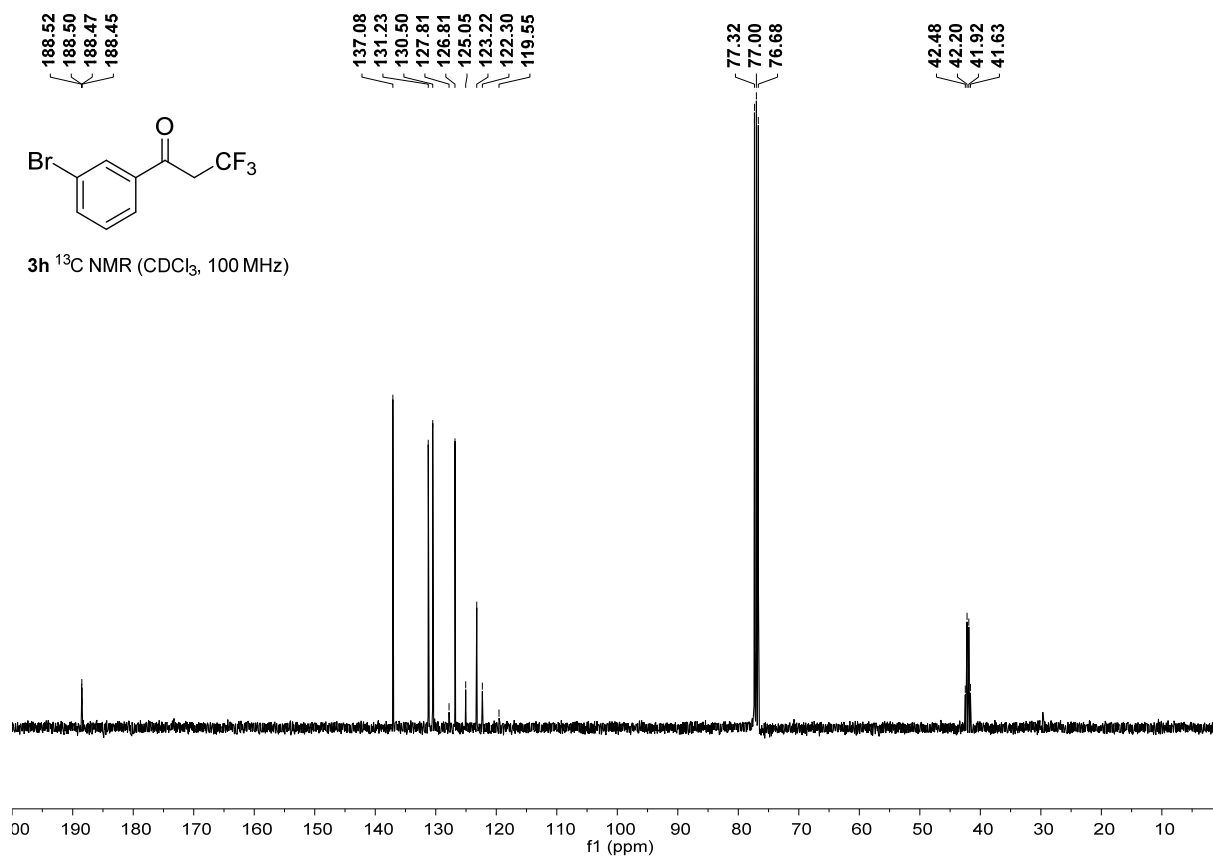



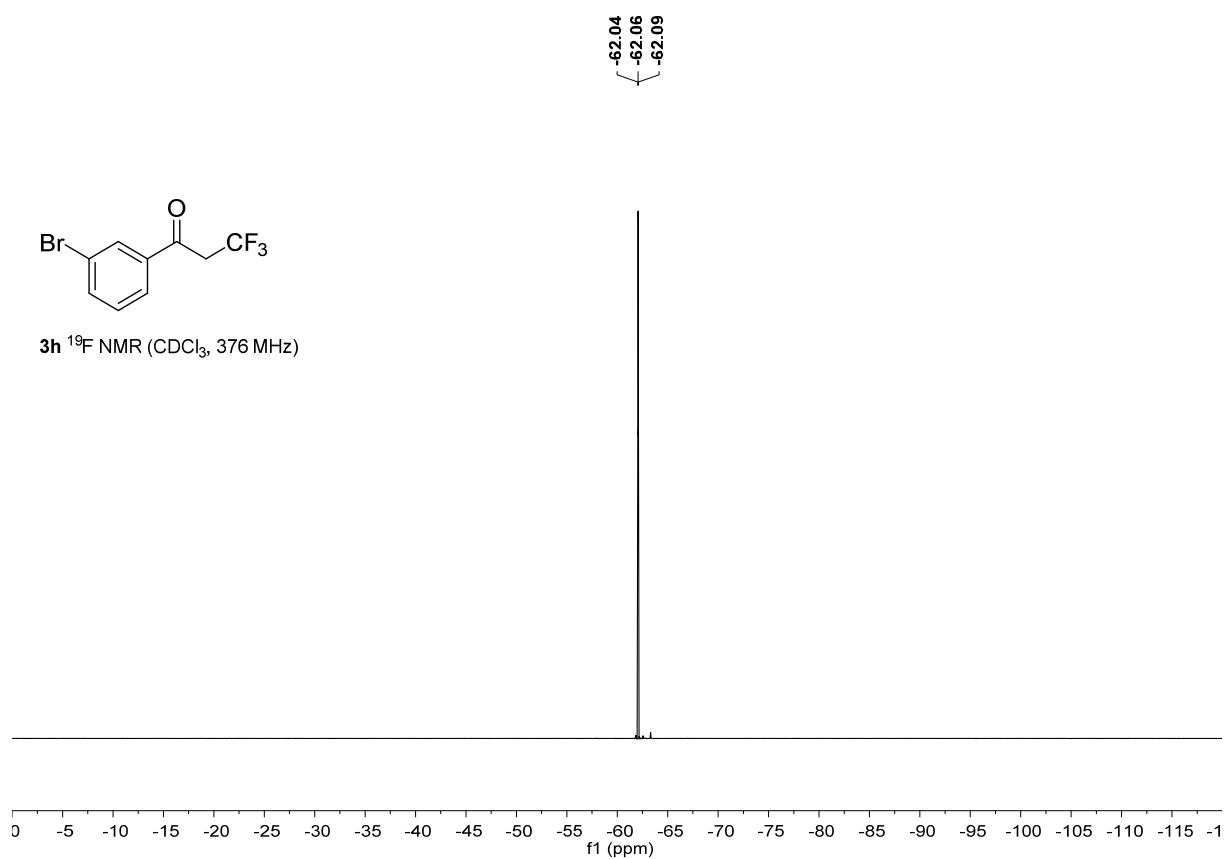

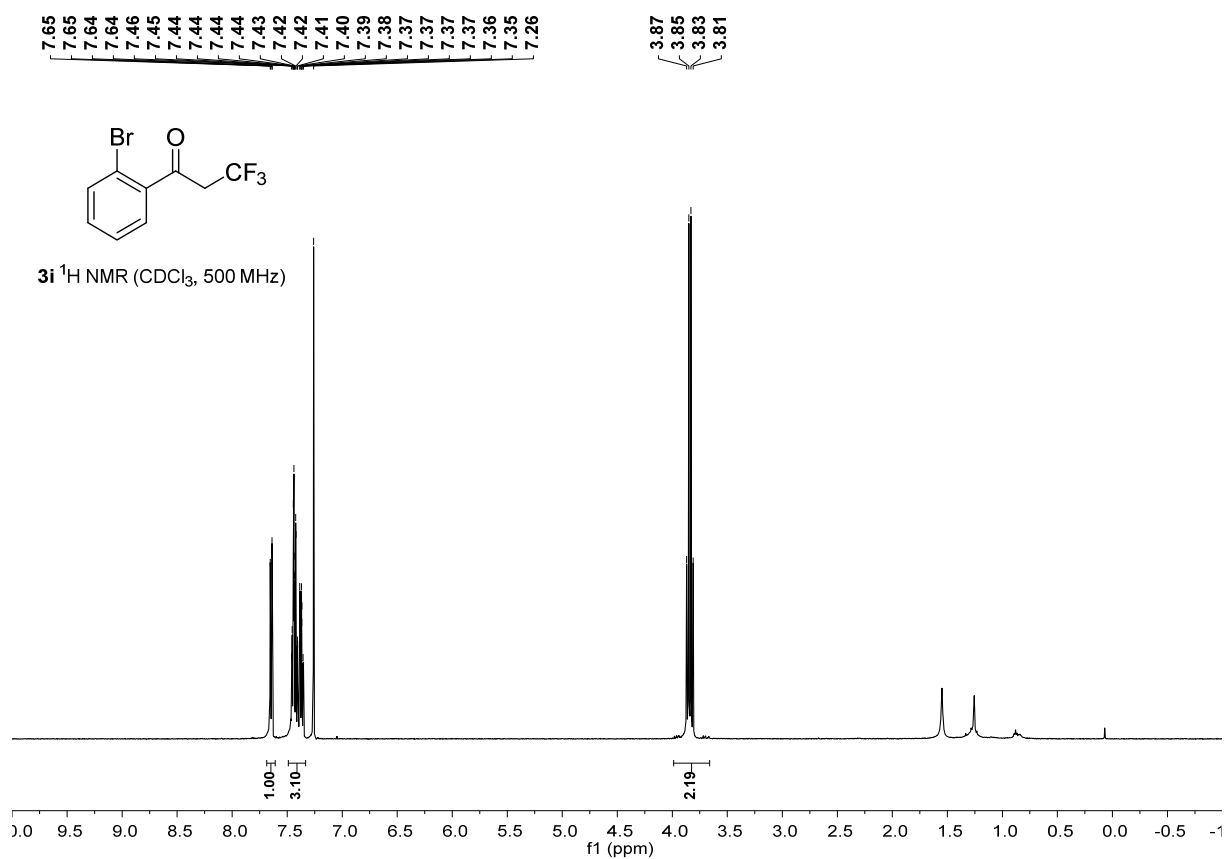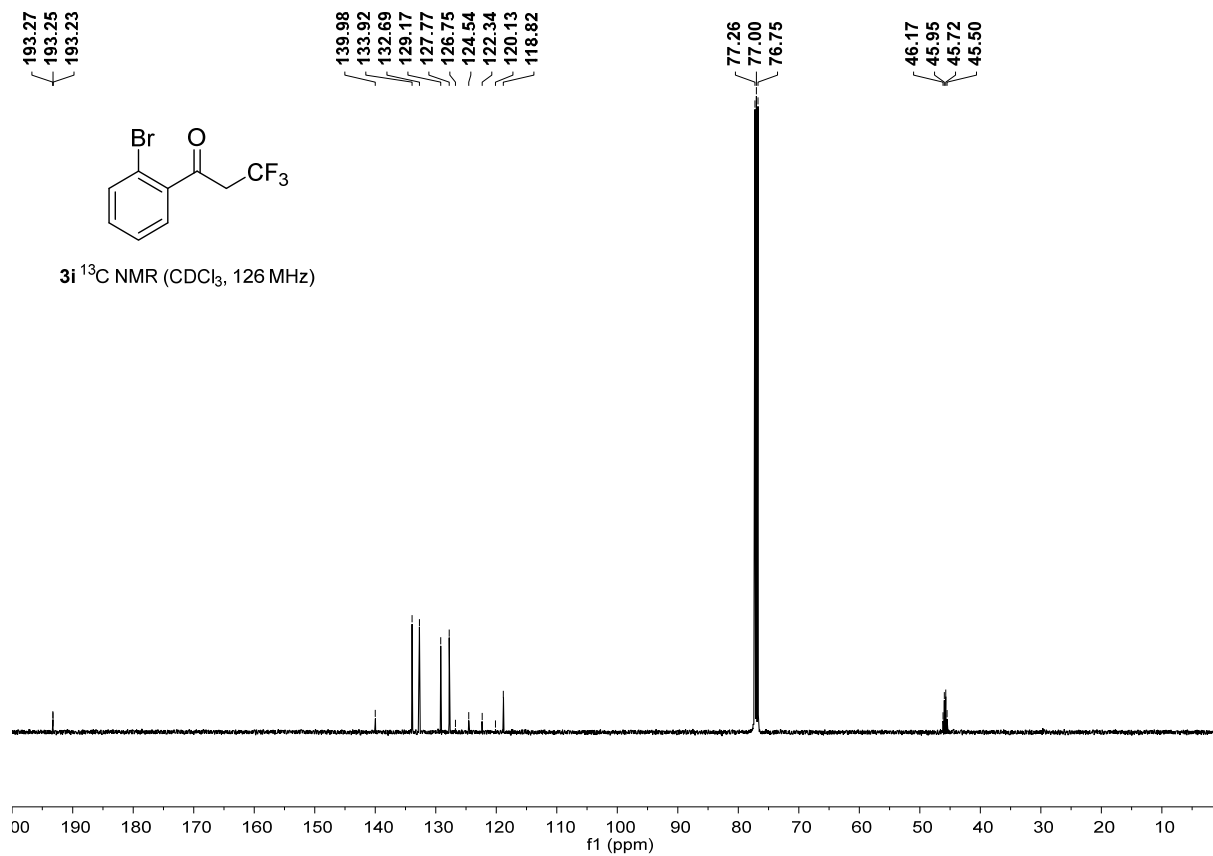

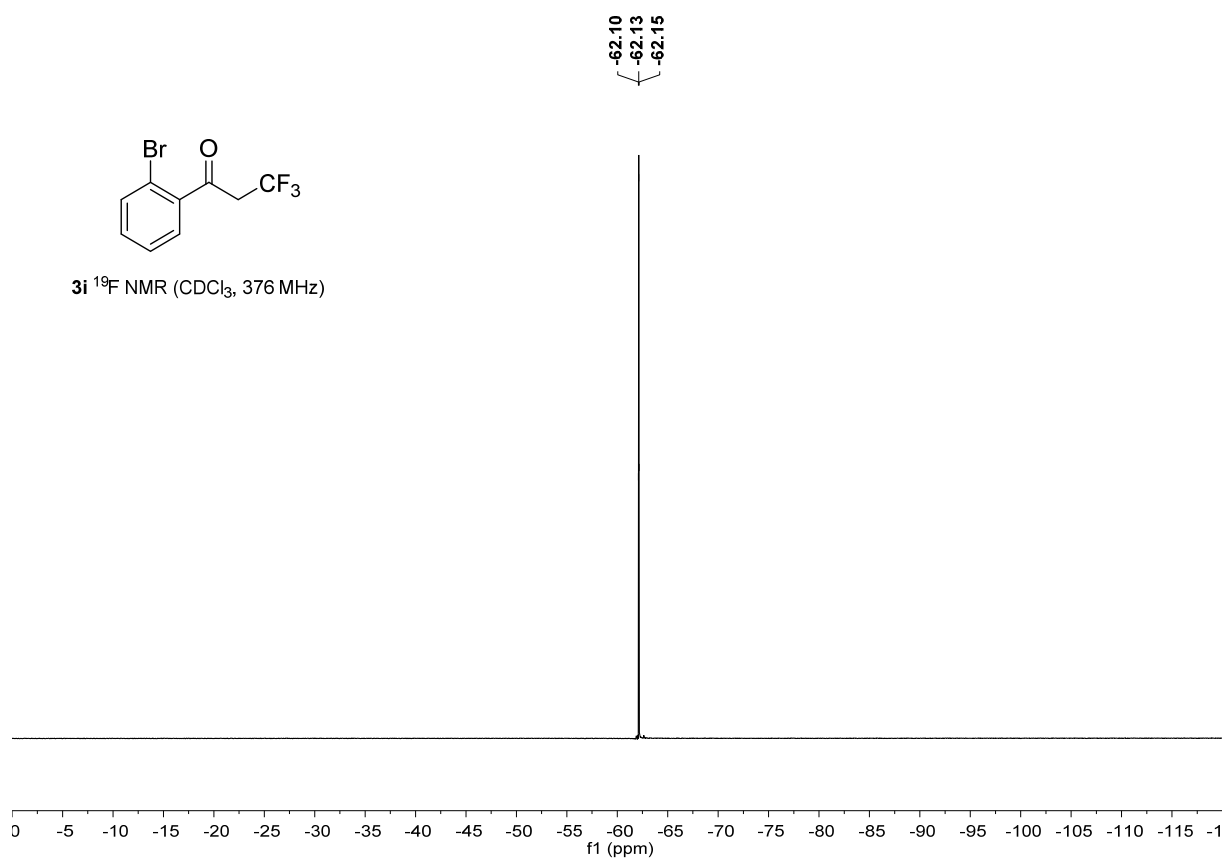

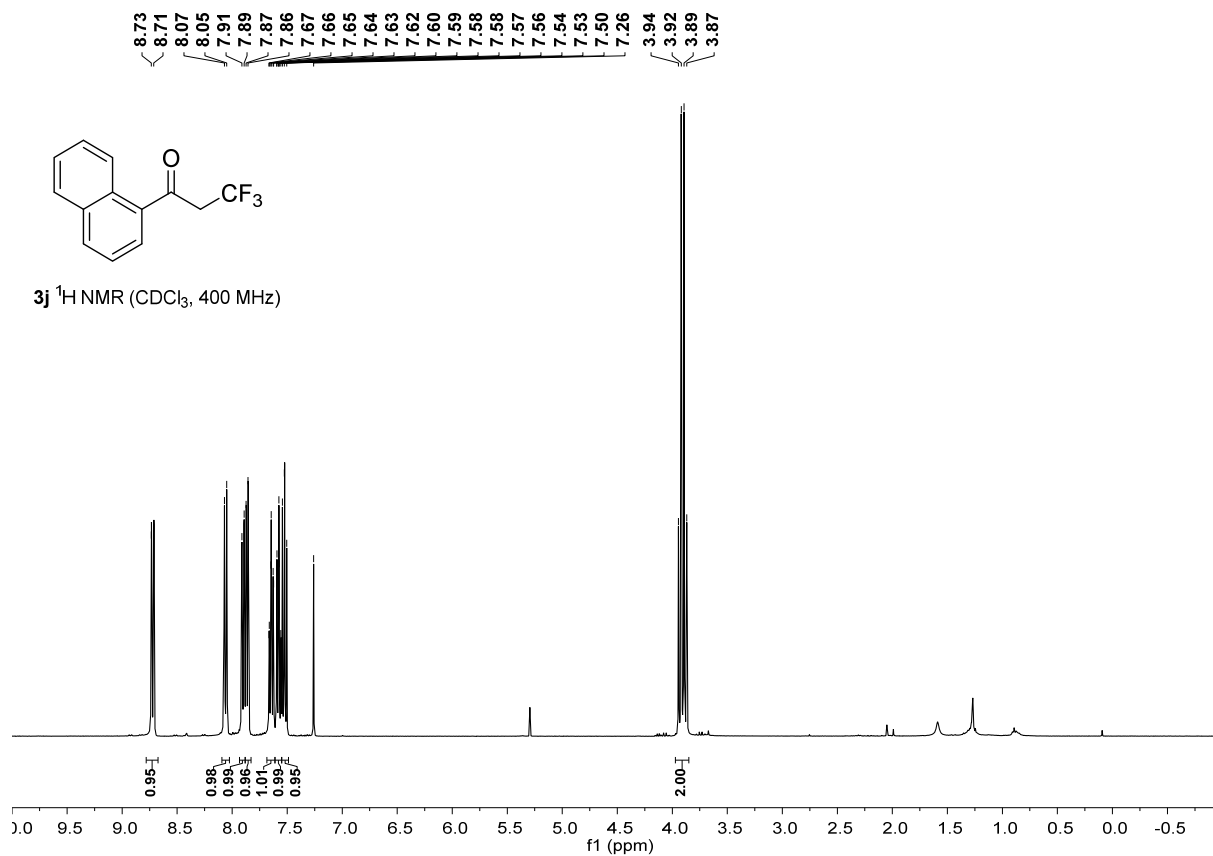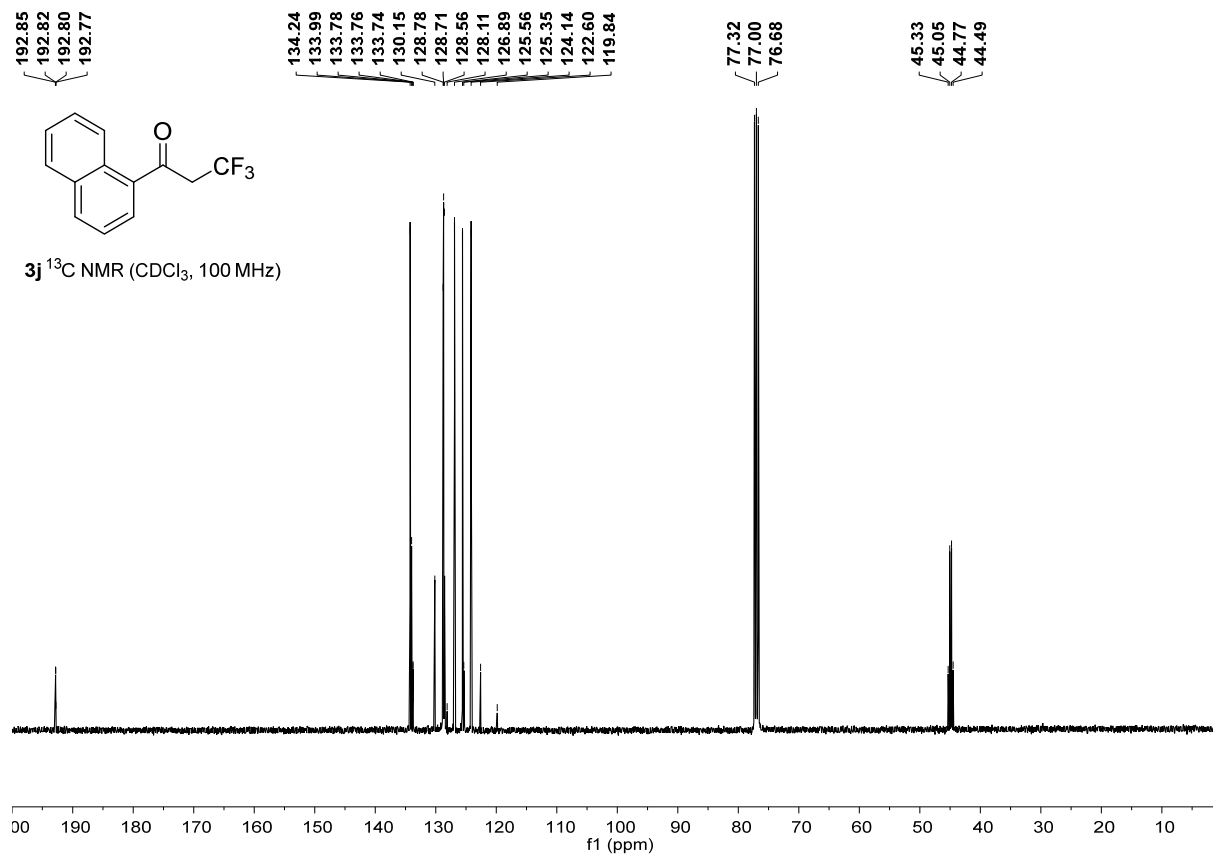

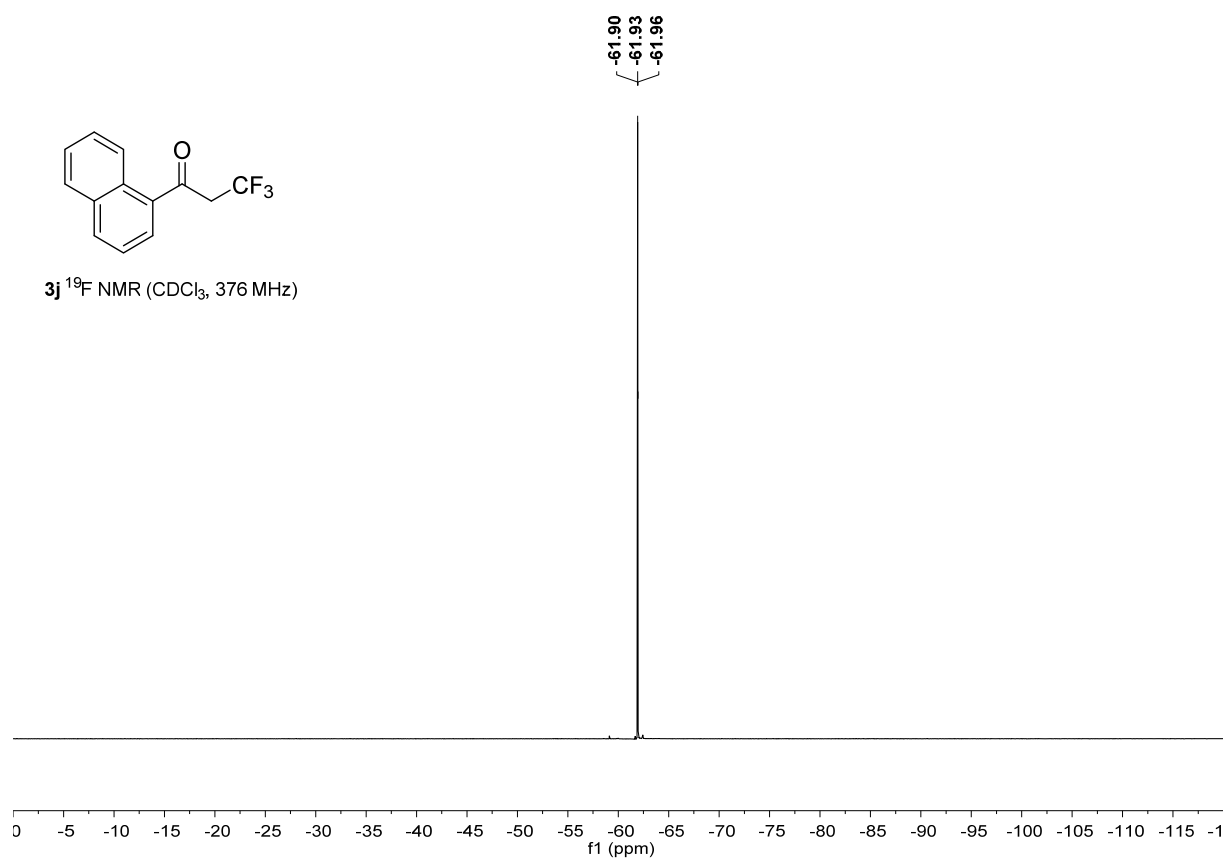

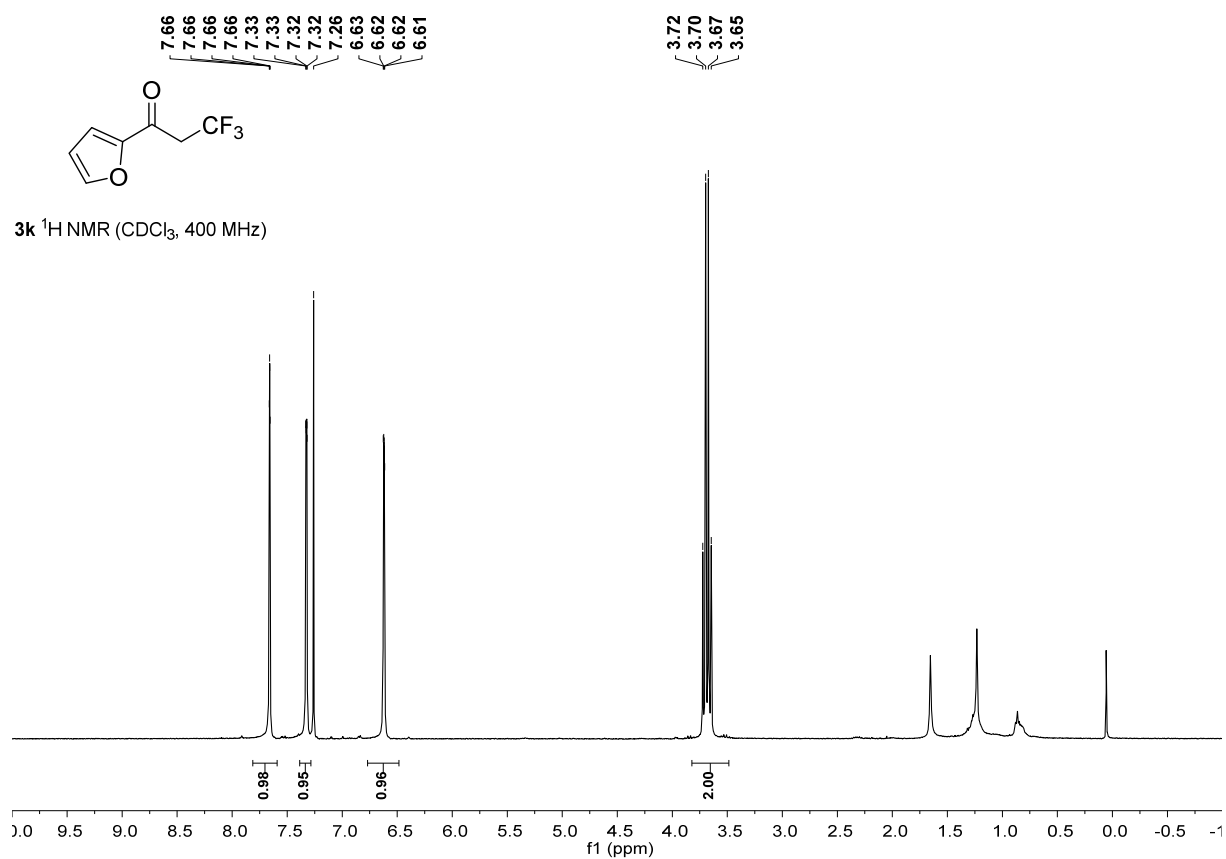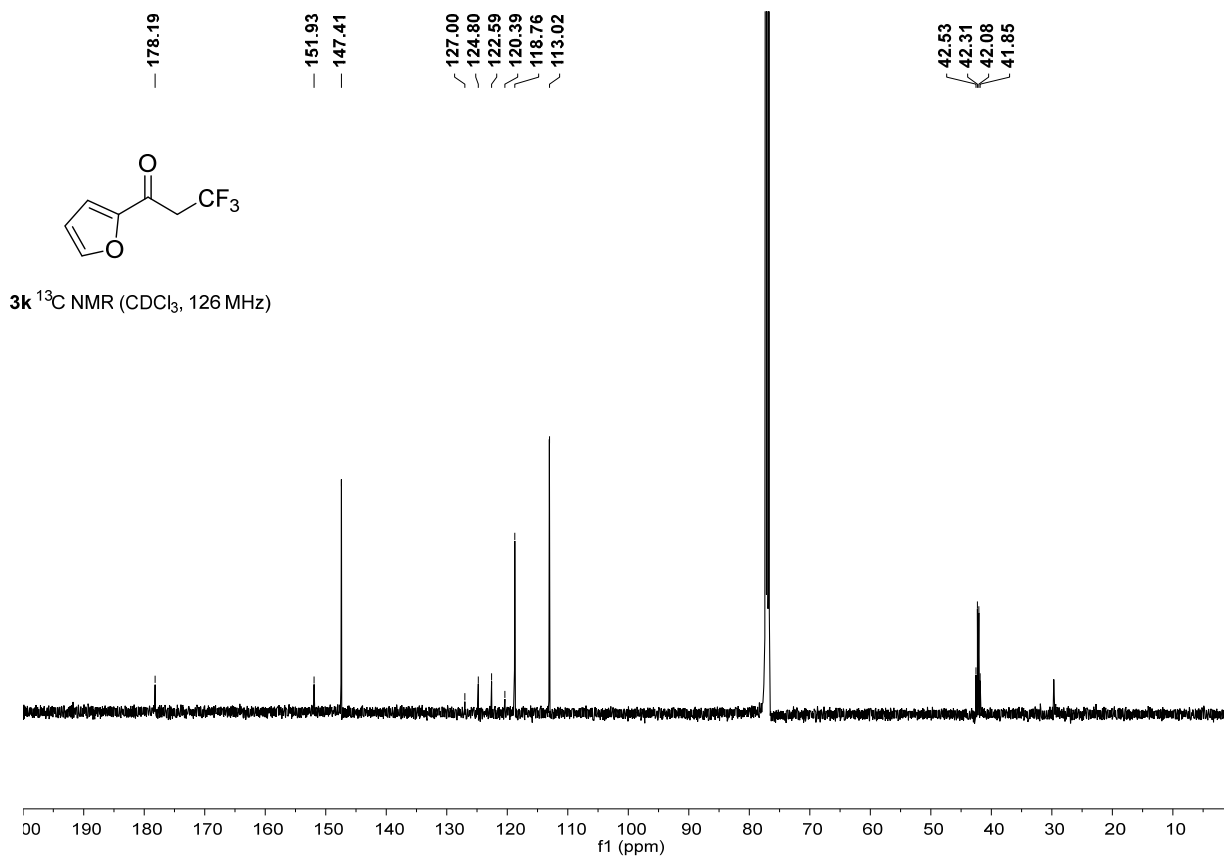

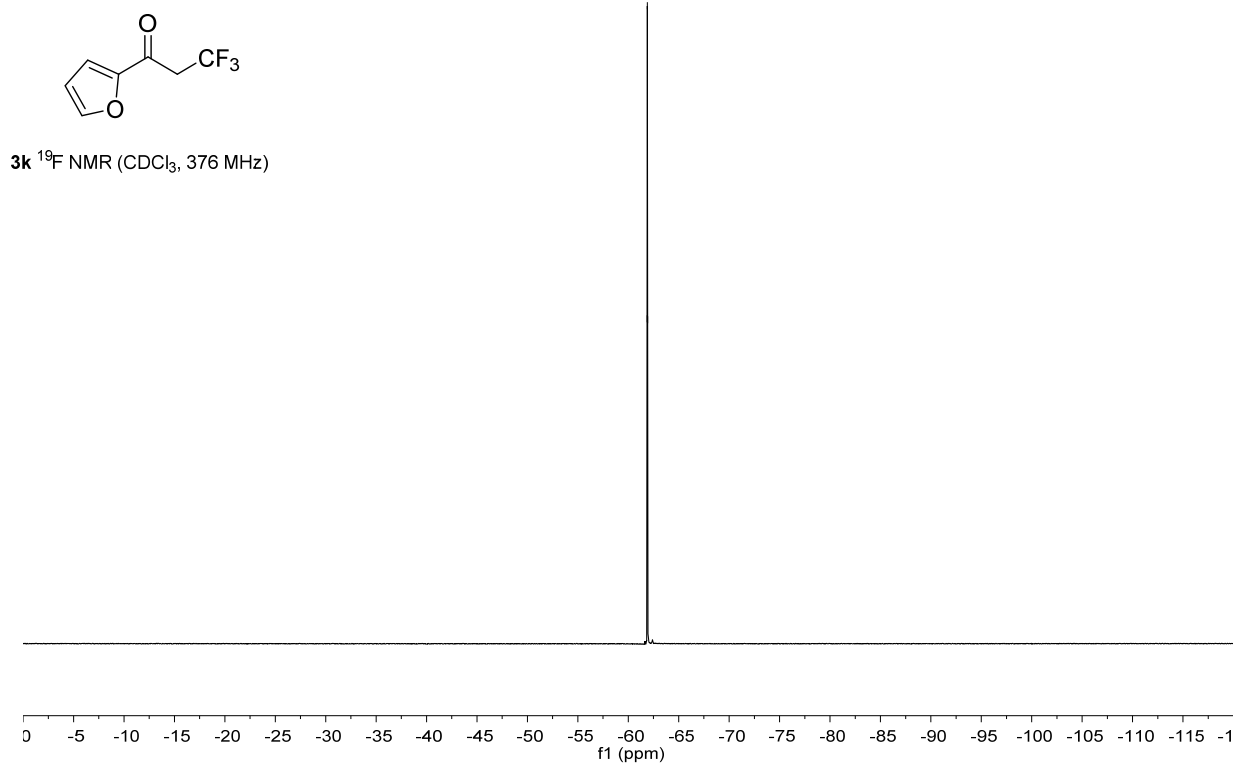

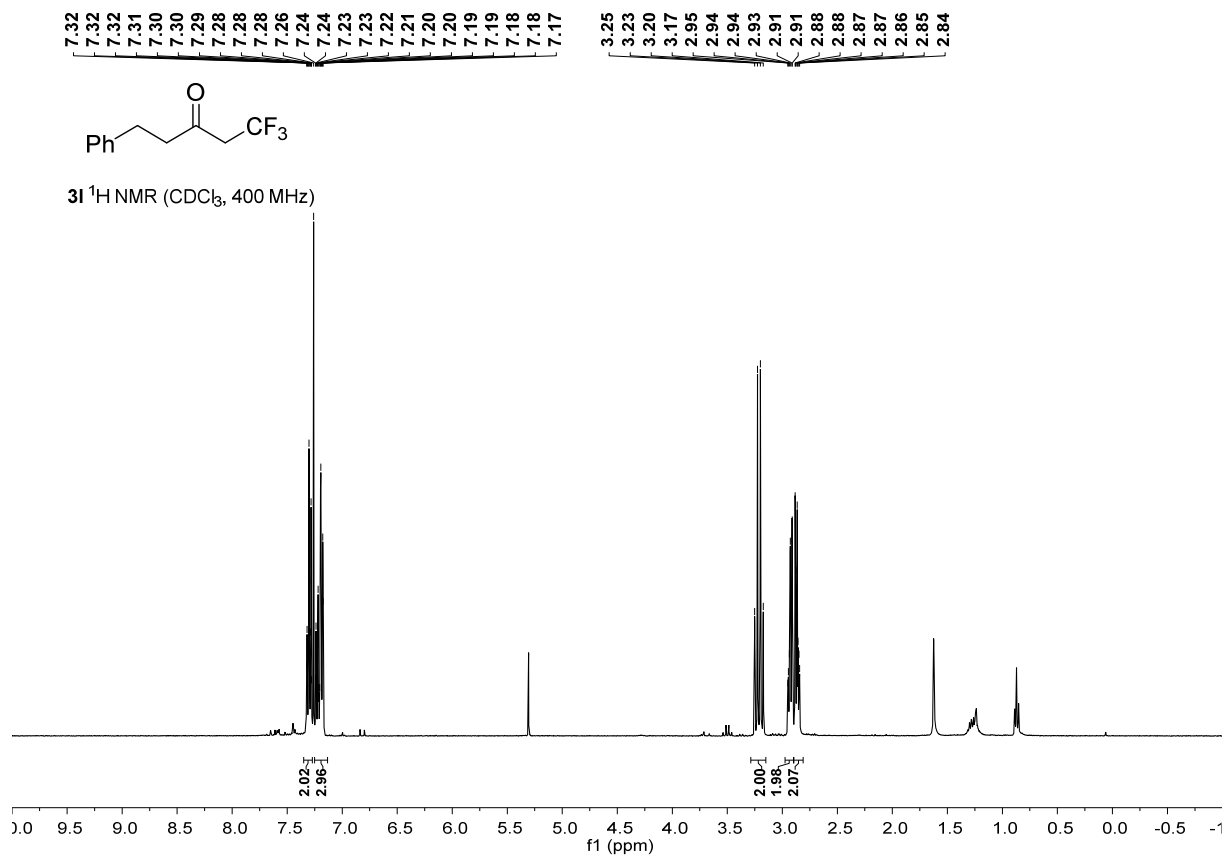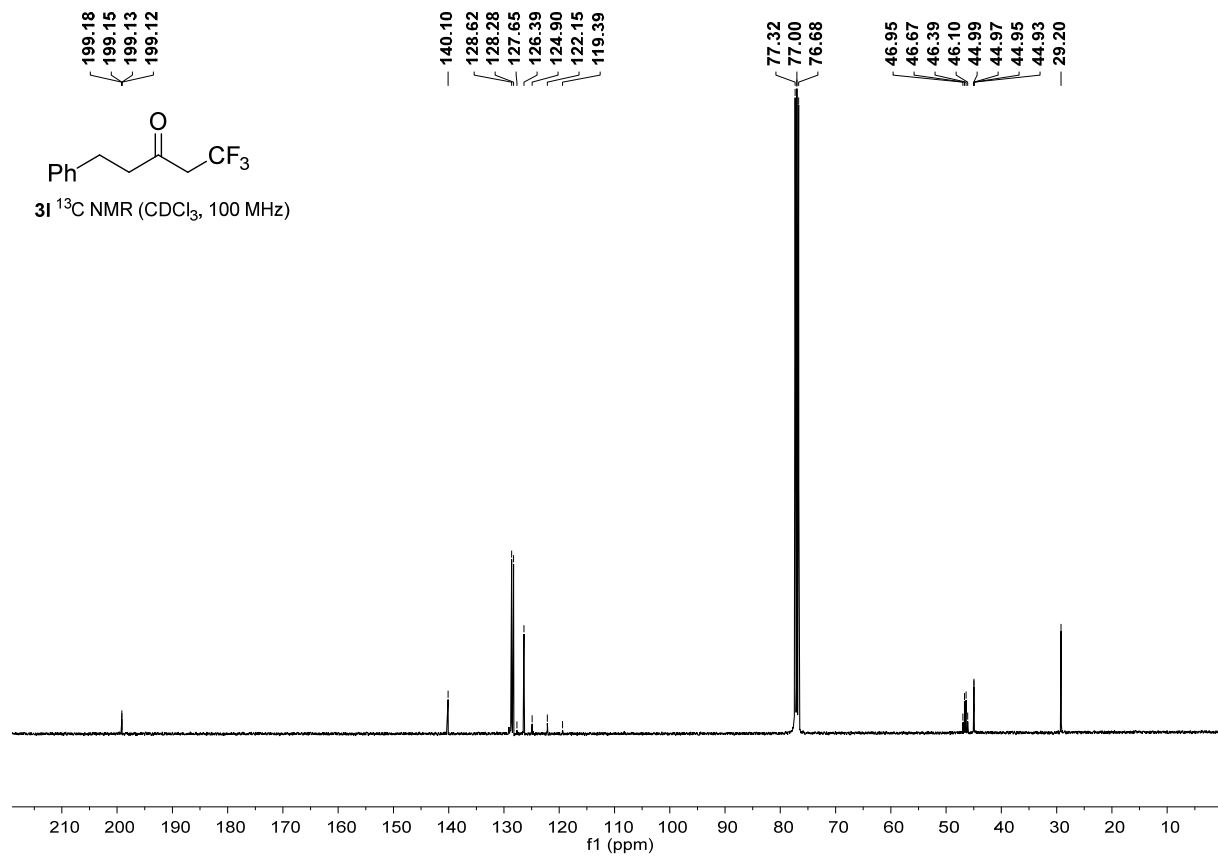



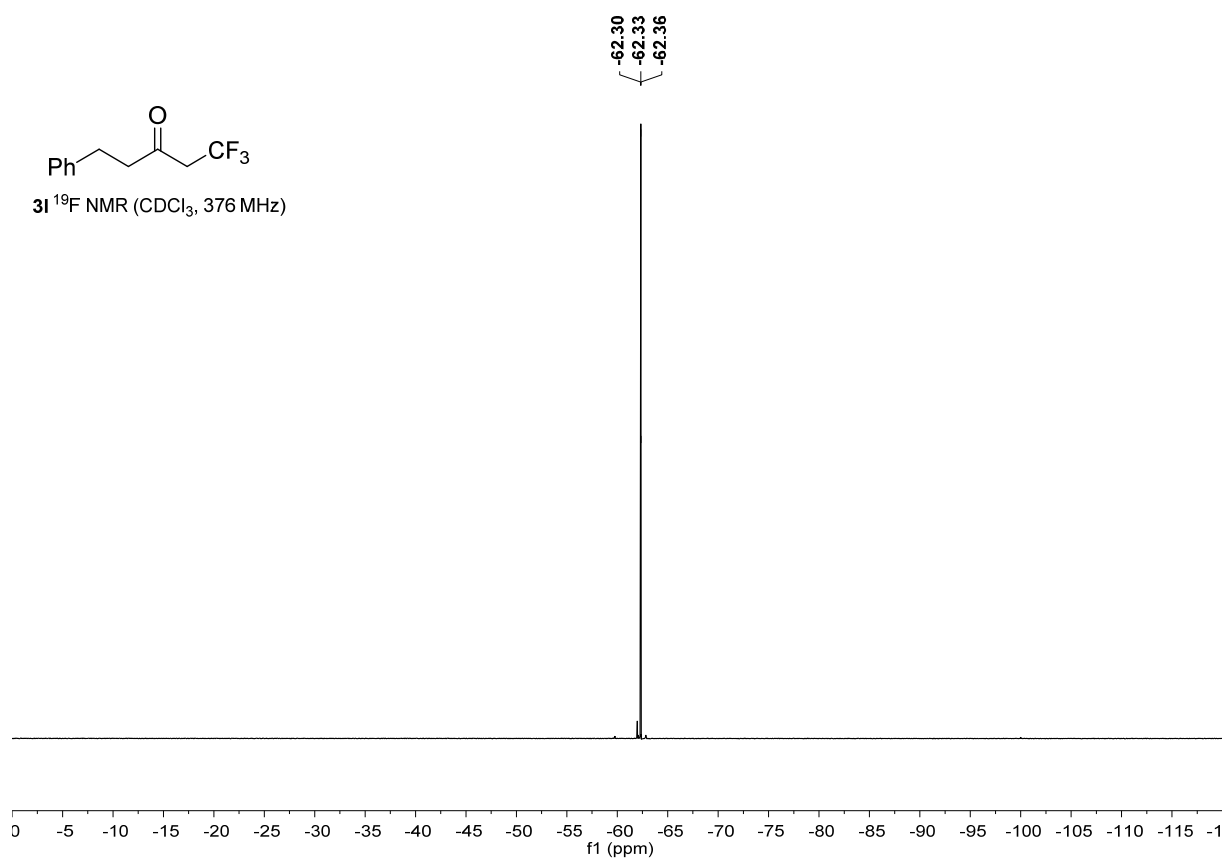

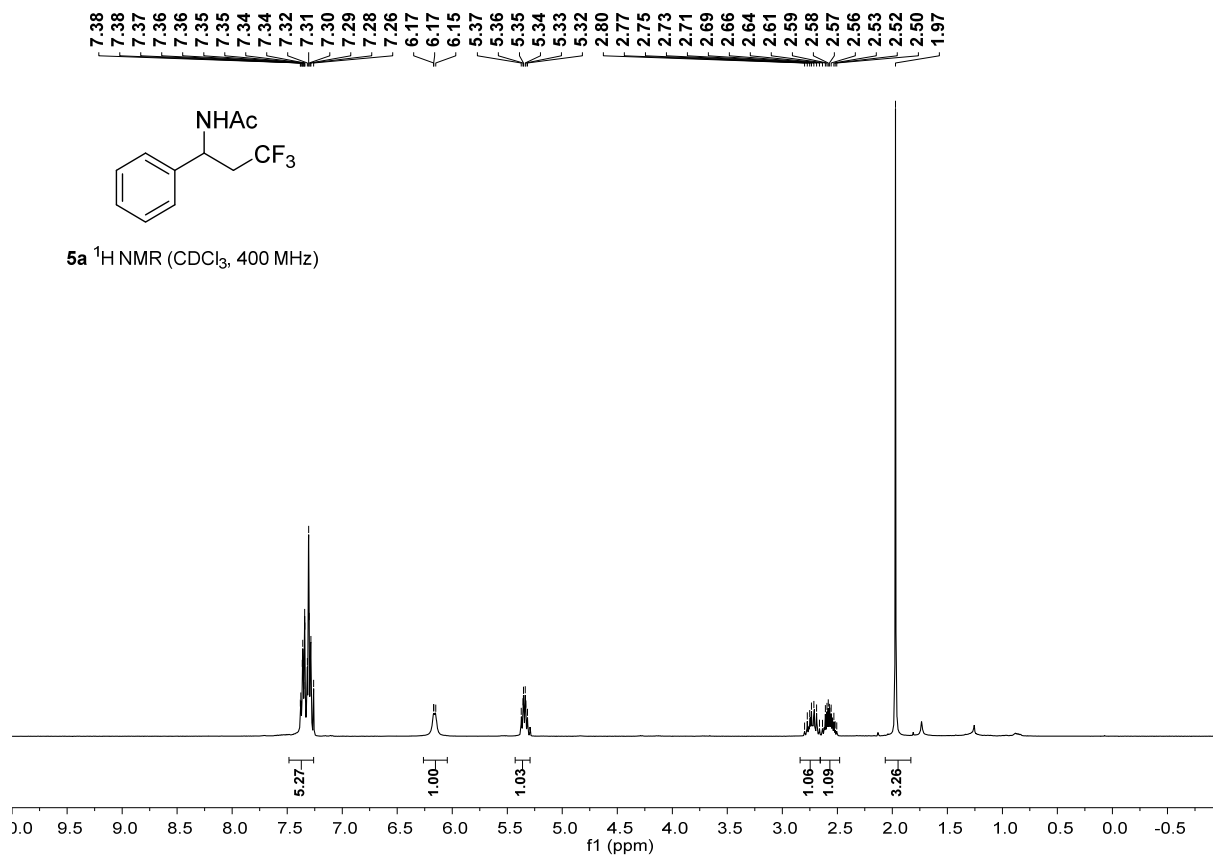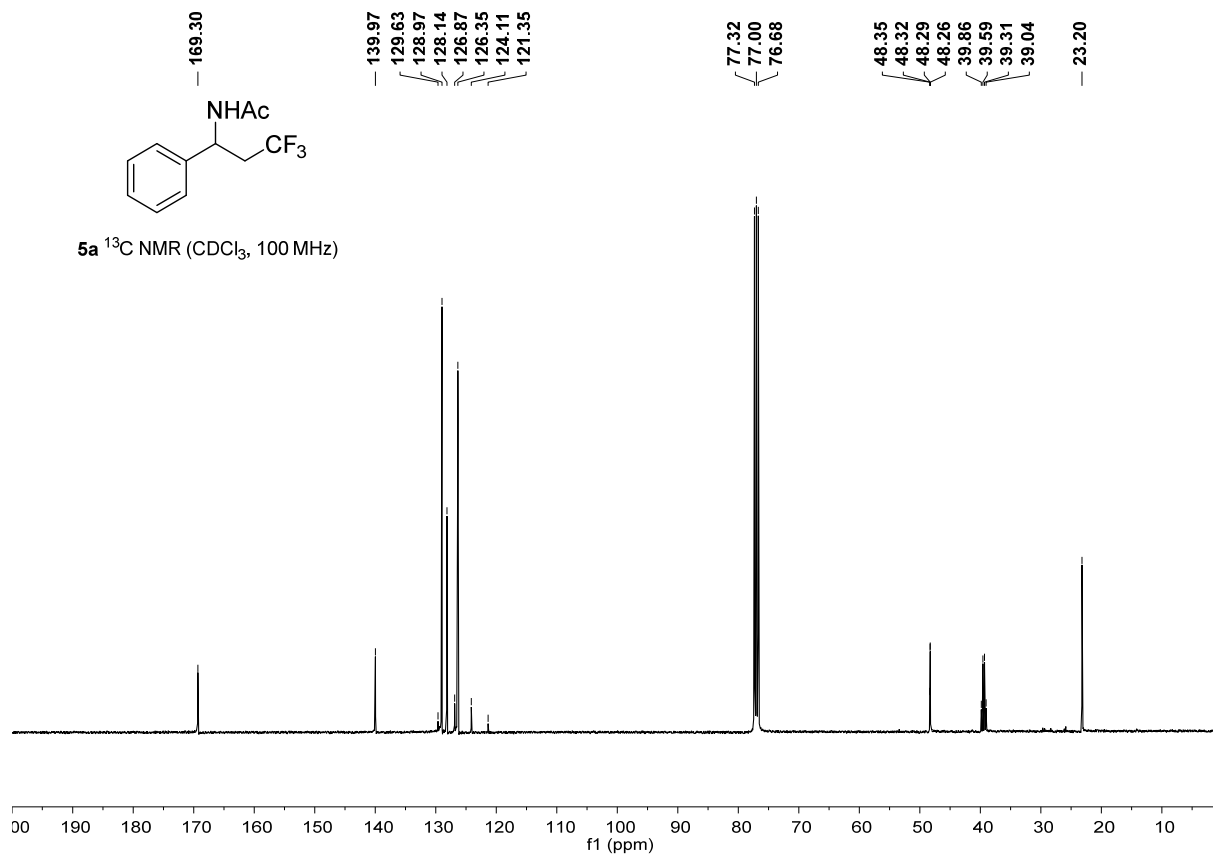

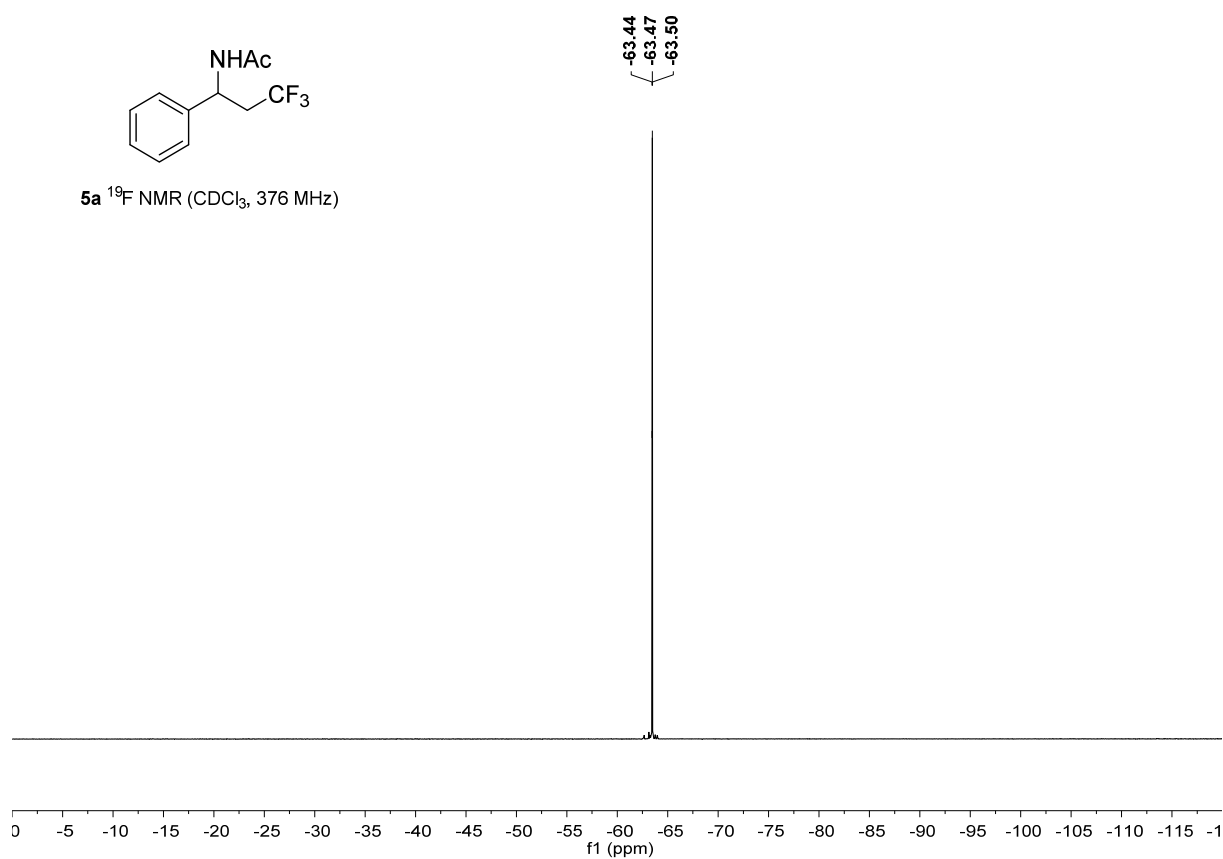

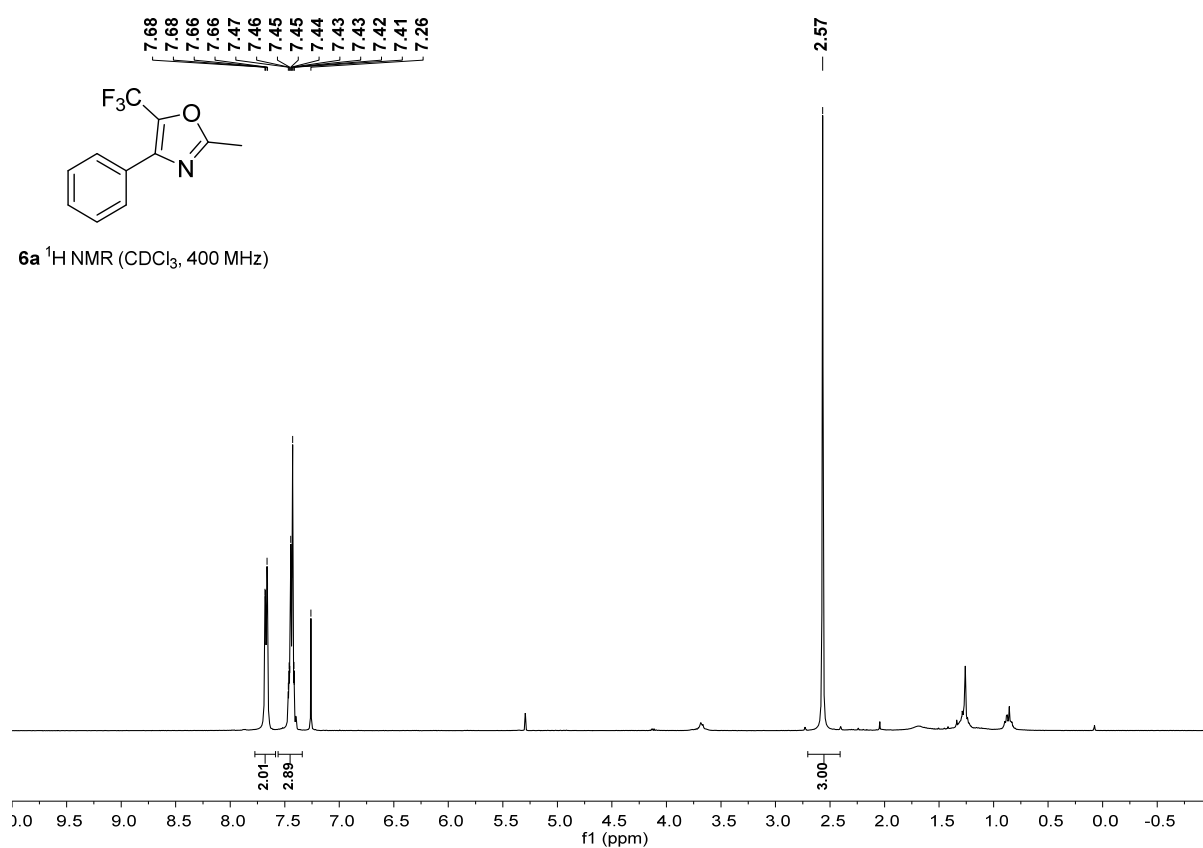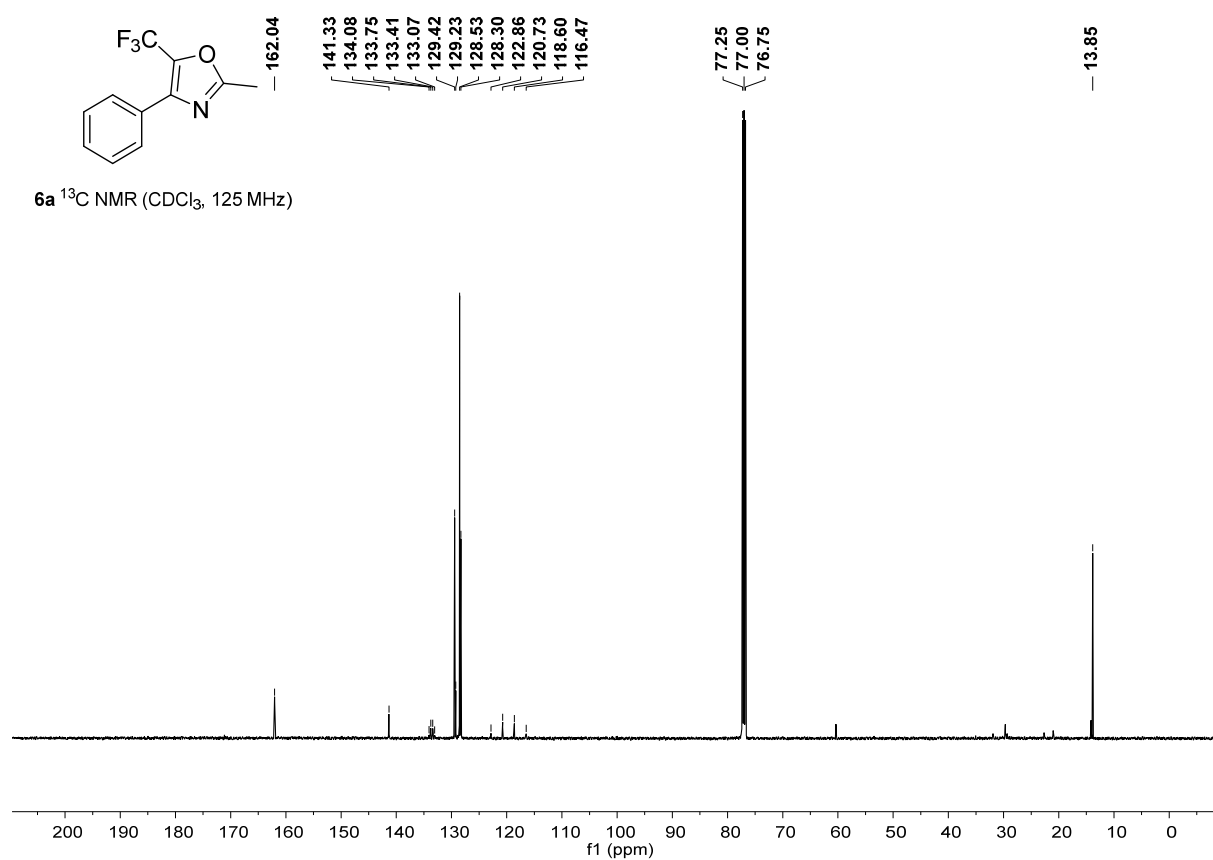

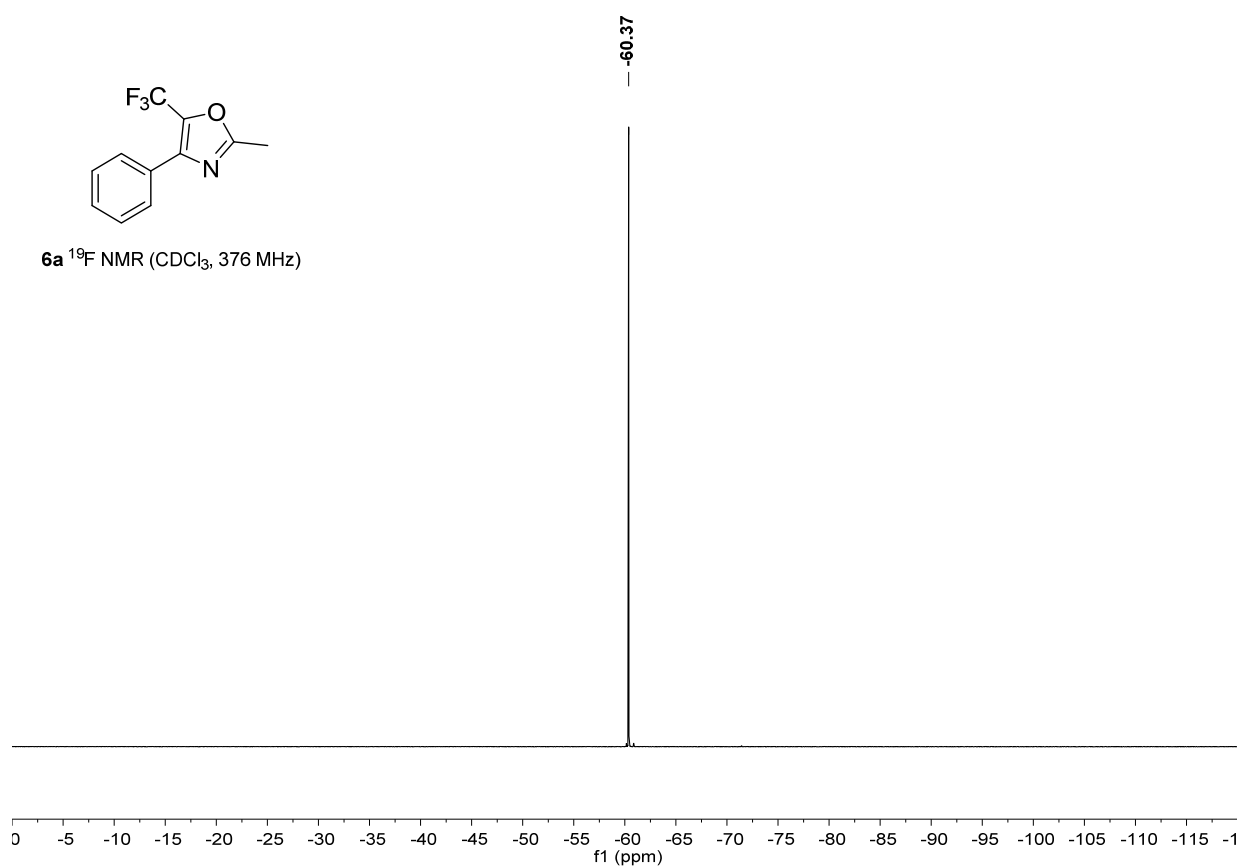

#### 4. References

1. Ke, J.; Tang, Y.; Yi, H.; Li, Y.; Cheng, Y.; Liu, C.; Lei, A., *Angew. Chem. Int. Ed.* **2015**, *54*, 6604.
2. Too, P. C.; Wang, Y.-F.; Chiba, S., *Org. Lett.* **2010**, *12*, 5688.
3. Novák, P.; Lishchynskyi, A.; Grushin, V. V., *J. Am. Chem. Soc.* **2012**, *134*, 16167.
4. Wang, Y.-F.; Lonca, G. H.; Chiba, S., *Angew. Chem. Int. Ed.* **2014**, *53*, 1067.
5. Deb, A.; Manna, S.; Modak, A.; Patra, T.; Maity, S.; Maiti, D., *Angew. Chem. Int. Ed.* **2013**, *52*, 9747.
6. Feng, C.; Loh, T.-P., *Chem. Sci.* **2012**, *3*, 3458.
7. Tanaka, K.; Ishiguro, Y.; Mitsunashi, K., *Bull. Chem. Soc. Jpn.* **1993**, *66*, 661.
